# Supplementary material for: Genome-Wide Association Study of Root System Architecture in Maize
Source: MDPI journal article supplement (doi:10.3390/genes13020181), 2022-01-20
Supplement: s1 [file s1]

## Figure legends of Supplementary Figures

### Figure S1. Histogram of distribution of eight root traits.

The X axis represents the value of root traits and the Y axis represents density. The red line is the normal distribution fitting line.

### Figure S2. Principal component analysis of root and aboveground traits.

(a) AREA and RTP\_COUNT fall outside the confidence interval. (b) Principal component analysis of root and aboveground traits excludes AREA and RTP\_COUNT. The X and Y axes represent the values of PCA1 and PCA2 in the transformed eigenvectors, respectively. The dotted ellipse represents a 95% confidence interval.

### Figure S3. Manhattan plot of eight root traits analyzed by GWAS.

The red dotted line shows the threshold (LOD = 5), points above the threshold are marked red.

### Figure S4. Manhattan map of aboveground traits analyzed by GWAS.

The red dotted line shows the threshold (LOD = 5), points above the threshold are marked red.

### Figure S5. Co-expression network analysis of root candidate genes.

Each node represents a candidate gene, lines between nodes indicate the co-expression between two genes. The red hexagons highlight four high-priority candidate genes that are predicted to be strongly related to maize root development.

### Figure S6. GWAS identification of high-priority genes for variation in maize root traits.

(a) GWAS identification of *GRMZM2G354338* and *GRMZM2G085042* as candidate genes for RSA variation. A partial Manhattan plot (upper) and an LD heat map (lower) are arranged. (b) The root trait of different haplotypes (chr6.S\_142873590). (c) The expression levels of *GRMZM2G354338* and *GRMZM2G085042* between different haplotypes (box plot). (d) GWAS identification of *GRMZM5G812926* as candidate gene for RSA variation. A partial Manhattan plot (upper) and an LD heat map (lower) are arranged. (e) The root trait of different haplotypes (chr1.S\_251385242). (f) The expression level of *GRMZM5G812926* between different haplotypes (box plot). Manhattan plot shows SNP associated with genes, star indicates significant SNPs loci. \* used to mark significance: \* represents  $P < 0.05$  and \*\* represents  $P < 0.01$ . When no significant, the  $P$  value is displayed.
