# Supplementary material for: Genome-Wide Association Study of Root System Architecture in Maize
Source: Genes (Basel). 2022 Jan 28;13(2):181. doi: 10.3390/genes13020181 (PMC8872597; doi:10.3390/genes13020181)
Supplement: Supplementary file 1 [file genes-13-00181-s001.zip]

Archive with 8 entries (8 files):
- Figure S1.tif
- Figure S2.tif
- Figure S3.tif
- Figure S4.tif
- Figure S5.tif
- Figure S6.tif
- Supplementary Figure Legends.pdf
- Supplementary Table.xlsx
