# Supplementary material for: Genome-Wide Association Study of Root System Architecture in Maize
Source: Genes (Basel). 2022 Jan 28;13(2):181. doi: 10.3390/genes13020181 (PMC8872597; doi:10.3390/genes13020181)
Supplement: Supplementary file 1 [file genes-13-00181-s001.zip › Supplementary Table.xlsx]

## Sheet: List
	Table S1. Information from the maize lines in the panel, including the pedigree and subpopulation.
	Table S2. The phenotypic data of eight root traits.
	Table S3. Description of eight aboveground traits.
	Table S4. The phenotypic data of aboveground traits used in this study.
	Table S5. The number of significant SNPs and candidate genes associated with eight root traits.
	Table S6. SNPs significantly associated with eight root traits and the candidate genes within 50 kb up- and downstream of each unique significant association SNPs.
	Table S7. The number of significant SNPs and candidate genes associated with eight aboveground traits.
	Table S8. SNPs significantly associated with eight aboveground traits and the candidate genes within 50 kb up- and downstream of each unique significant association SNPs.
	Table S9. List of high-priority candidate genes generated from co-expression network analysis.

## Sheet: Table S1
Table S1. Information from the maize lines in the panel, including the pedigree and subpopulation.
Lines	Pedigree	Origin	Subpopulations	Adaptation	SS	NSS	TST
150	150	China	Mixed	temperate	0.4745	0.441	0.0845
177	177	China	Mixed	temperate	0.1695	0.7	0.1305
238	238	China	NSS	temperate	0.001	0.885	0.114
268	(shen5003×U8112) F3×32	China	NSS	temperate	0.114	0.5495	0.3365
501	501	China	NSS	temperate	0.049	0.6235	0.3275
647	Landrace	China	Mixed	tropical/subtropical	0.048	0.465	0.487
812	Improved from U8112	China	SS	temperate	0.9155	0.084	0.0005
1462	1462	China	NSS	temperate	0.0975	0.5205	0.382
3411	3411	China	Mixed	temperate	0.031	0.9685	0.0005
4019	G108×G172	China	NSS	temperate	0.4633	0.4313	0.1054
5213	Improved from Mo17	China	Mixed	temperate	0.4738	0.4028	0.1234
5311	GuiZhouQingLongWuSuiBai	China	NSS	temperate	0.0235	0.591	0.3855
7327	S37×3H-2	China	NSS	temperate	0.0935	0.6665	0.24
7381	7381	China	NSS	temperate	0.0555	0.4845	0.46
8902	Ye107×81162	China	Mixed	temperate	0.6397	0.3583	0.002
9642	9642	China	Mixed	temperate	0.266	0.386	0.348
9782	American Hybrid	China	NSS	temperate	0.173	0.7255	0.1015
81162	(AiJin525×Ye107)×106	China	Mixed	temperate	0.1997	0.5861	0.2142
04K5702	Landrace	China	NSS	temperate	0.0335	0.4605	0.506
05W002	05W002-1	China	Mixed	temperate	0.3545	0.5045	0.141
05WN230	05WN230-1	China	Mixed	temperate	0.2209	0.4573	0.3218
07KS4	Unknown	China	NSS	temperate	0.3015	0.625	0.0735
18-599	American Hybrid P78599	China	NSS	temperate	0.083	0.541	0.376
3H-2	(WeiDa202×Zi330)×H84	China	Mixed	temperate	0.0005	0.4973	0.5022
4F1	Improved from Mo17 by radiation	China	NSS	temperate	0.001	0.9985	0.0005
7884-4Ht	78-6×H84	China	Mixed	temperate	0.166	0.5685	0.2655
835a	U8112×Ye515	China	NSS	temperate	0.1415	0.6335	0.225
975-12	78698×Dan9046	China	Mixed	temperate	0.471	0.3835	0.1455
A619	The University of Illinois, USA	USA	NSS	temperate	0.0395	0.96	0.0005
B11	Landrace	China	TST	tropical/subtropical	0.0085	0.16	0.8315
B111	BSSS(R)C9	China	Mixed	temperate	0.3695	0.4575	0.173
B113	BS11(FR)C9	China	Mixed	temperate	0.1785	0.551	0.2705
B114	Pool 41	China	NSS	temperate	0.246	0.6935	0.0605
B151	B151	China	Mixed	temperate	0.0025	0.436	0.5615
B73	BSSS	China-V	SS	temperate	1	0	0
B77	B77-3	China	Mixed	temperate	0.102	0.4025	0.4955
BEM	Landrace	China	NSS	temperate	0.2395	0.664	0.0965
BS16	Population BS16	China	Mixed	temperate	0.0025	0.562	0.4355
By4839	BHO	China	NSS	temperate	0.0035	0.9685	0.028
By4944	BHO	China	NSS	temperate	0.017	0.9805	0.0025
By804	BHO*	China	NSS	temperate	0.0005	0.999	0.0005
By807	BHO	China	NSS	temperate	0.0005	0.999	0.0005
By809	BHO	China	NSS	temperate	0.0005	0.999	0.0005
By813	BHO	China	NSS	temperate	0.0005	0.999	0.0005
By843	BHO	China	NSS	temperate	0.0025	0.9965	0.001
BZN	Landrace	China	NSS	temperate	0.14	0.725	0.135
C8605	Tie7922×Shen5003	China-V	NSS	temperate	0.4942	0.5058	0
CF3	CF3	China	Mixed	temperate	0.5148	0.4402	0.045
chuan48-2	Synthetic	China	Mixed	temperate	0.1746	0.5533	0.2721
CI7	The University of Illinois, USA	USA	Mixed	temperate	0.148	0.5855	0.2665
CIMBL1	derived from BSCB1(R)C9	USA	NSS	tropical/subtropical	0.1855	0.5885	0.226
CIMBL10	(((CML 408 / B104) x (CML 411/ B104))-1-1-BB)-B	CIMMYT	TST	tropical/subtropical	0.3638	0.1709	0.4653
CIMBL101	(LAMA2002-46-2-B)-B	CIMMYT	TST	tropical/subtropical	0.0005	0.1621	0.8374
CIMBL102	(LAMA2002-53-5-B)-B	CIMMYT	TST	tropical/subtropical	0.0925	0.0155	0.8921
CIMBL105	(LAMA2002-61-1-B)-B	CIMMYT	TST	tropical/subtropical	0.0045	0.073	0.9225
CIMBL106	(MAS[206/312]-23-2-1-1-BBB/[BETASYN]BC1-10-2-1-#-B)-B	CIMMYT	TST	tropical/subtropical	0.0035	0.019	0.9775
CIMBL107	(MAS[206/312]-23-2-1-1-BBB/[BETASYN]BC1-11-3-1-1-1)-B	CIMMYT	TST	tropical/subtropical	0.0015	0.034	0.9645
CIMBL108	(MAS[206/312]-23-2-1-1-BBB/[BETASYN]BC1-3-7-1-1-1)-B	CIMMYT	TST	tropical/subtropical	0.002	0.009	0.989
CIMBL109	(MAS[206/312]-23-2-1-1-BBB/[BETASYN]BC1-6-1-1-1-1)-B	CIMMYT	TST	tropical/subtropical	0.018	0.001	0.981
CIMBL11	(((CML150xCML451)-B-33-3-1-BBx(CML176 x CL-G2501)-B-43-1)-B-38-1-2-1-1-B)-B	CIMMYT	TST	tropical/subtropical	0.001	0.001	0.998
CIMBL110	(MAS[206/312]-23-2-1-1-BBB/[BETASYN]BC1-9-3-1-1-1)-B	CIMMYT	TST	tropical/subtropical	0.013	0.001	0.986
CIMBL111	(MAS[MSR/312]-117-2-2-1-BBB/[BETASYN]BC1-11-5-2-1-1)-B	CIMMYT	TST	tropical/subtropical	0.0035	0.01	0.9865
CIMBL112	(MBR C6 AmF9-2-B-#-3-1-BBBBB)-B	CIMMYT	TST	tropical/subtropical	0.0295	0.0425	0.928
CIMBL114	(Nei 402025-BBB)-B	CIMMYT	TST	tropical/subtropical	0.0115	0.114	0.8745
CIMBL115	(Nei 9008-BBB)-B	CIMMYT	TST	tropical/subtropical	0.0055	0.002	0.9925
CIMBL117	(OBATANPA-SRc1F3(balbulk1)-#bal/[BETASYN]BC1-65-2-1-BB)-B	CIMMYT	TST	tropical/subtropical	0.0295	0.0745	0.896
CIMBL118	(OBATANPA-SRc1F3(balbulk1)-#bal/[BETASYN]BC1-67-1-2-BBB)-B	CIMMYT	TST	tropical/subtropical	0.0235	0.051	0.9255
CIMBL119	(P390Am/CMLc4F253-B-2-2-4-1-BB)-B	CIMMYT	TST	tropical/subtropical	0.0075	0.049	0.9435
CIMBL12	(((CML150xCML451)-B-33-3-1-BBx(CML176 x CL-G2501)-B-43-1)-B-38-1-2-2-1-B)-B	CIMMYT	TST	tropical/subtropical	0.0045	0.001	0.9945
CIMBL120	(P391c2 F22-1-1-2-1-BBB)-B	CIMMYT	TST	tropical/subtropical	0.065	0.1621	0.7729
CIMBL121	(P591c4 1 y 2 GEN F205-1-1-1-BBB)-B	CIMMYT	TST	tropical/subtropical	0.0005	0.045	0.9545
CIMBL122	(P591c4 1 y 2 GEN F3-1-1-2-B-B-B)-B	CIMMYT	TST	tropical/subtropical	0.016	0.036	0.948
CIMBL123	(P72c1xCML-297 x CL-02410-3-1-1-BBB)-B	CIMMYT	TST	tropical/subtropical	0.0135	0.0605	0.926
CIMBL124	(P84c3BcxLine recycle LL TpreAsiaxMIRT F59-2-1-1-1-BB)-B	CIMMYT	TST	tropical/subtropical	0.001	0	0.999
CIMBL125	(P84c3BcxLLTtardAsiaxMIRTF41-2-1-2-2-BB)-B	CIMMYT	TST	tropical/subtropical	0.131	0	0.869
CIMBL126	(Pob . 391 C4 F91-1-2-1-BB)-B	CIMMYT	TST	tropical/subtropical	0.0095	0.001	0.9895
CIMBL127	(Pop.147-F2#132-1-1-B-2-BBBB)-B	CIMMYT	TST	tropical/subtropical	0.024	0.0905	0.8855
CIMBL128	(Pop.28C9HC113-3-1-4-B*-8-BBB)-B	CIMMYT	TST	tropical/subtropical	0.0005	0.0575	0.942
CIMBL129	(pop.69 Templado Amarillo QPM -BBB1-6-BBB)-B	CIMMYT	Mixed	tropical/subtropical	0.022	0.3445	0.6335
CIMBL13	(((CML285/B104)x(CML288/NC300))-2-1-BB)-B	CIMMYT	TST	tropical/subtropical	0.3183	0.1321	0.5495
CIMBL133	(SAM4(Angola)/[BETASYN]BC1-66-1-3-BBB)-B	CIMMYT	TST	tropical/subtropical	0.0015	0.063	0.9355
CIMBL136	(SRR-C1 SA3MH32-4-3-B-1-1-2-BB)-B	CIMMYT	TST	tropical/subtropical	0.0285	0.054	0.9175
CIMBL137	(TX02-1008-3-B)-B	CIMMYT	Mixed	tropical/subtropical	0.1085	0.4835	0.408
CIMBL138	(TX03-1004-168-B)-B	CIMMYT	TST	tropical/subtropical	0.288	0.211	0.501
CIMBL139	(TX03-1004-179-B)-B	CIMMYT	TST	tropical/subtropical	0.262	0.21	0.528
CIMBL14	(((Ko326y x Tx806)-6-1-1-1-BB/CML161) x (Tx802/CML161))-1-BBB)-B	CIMMYT	TST	tropical/subtropical	0.0435	0.2765	0.68
CIMBL140	(TX03-1004-20-B)-B	CIMMYT	TST	tropical/subtropical	0.0255	0.5482	0.4263
CIMBL142	(TX03-1005-15-B)-B	CIMMYT	TST	tropical/subtropical	0.3423	0.1782	0.4795
CIMBL144	(TX03-1007-18-B)-B	CIMMYT	SS	tropical/subtropical	0.6227	0.3223	0.055
CIMBL147	(TX03-1013-186-B)-B	CIMMYT	TST	tropical/subtropical	0.002	0	0.998
CIMBL148	(TX03-1013-198-B)-B	CIMMYT	TST	tropical/subtropical	0.083	0.091	0.826
CIMBL149	(TX03-1013-1-B)-B	CIMMYT	TST	tropical/subtropical	0.001	0.0655	0.9335
CIMBL15	((CL-RCY020 x CL-02450)-B-40-1-1-BB)-B	CIMMYT	TST	tropical/subtropical	0.0005	0.1235	0.876
CIMBL150	(TX03-1034-46-B)-B	CIMMYT	TST	tropical/subtropical	0.039	0.2736	0.6873
CIMBL151	(TX03-1034-63-B)-B	CIMMYT	TST	tropical/subtropical	0.056	0.3025	0.6415
CIMBL152	(TX03-1035-55-B)-B	CIMMYT	TST	tropical/subtropical	0.059	0.313	0.628
CIMBL153	(TX03-1037-3-B)-B	CIMMYT	TST	tropical/subtropical	0.0025	0.2405	0.757
CIMBL154	(TZI18-BBBB)-B	CIMMYT	Mixed	tropical/subtropical	0.045	0.464	0.491
CIMBL155	(ZM305/[BETASYN]BC1-29-1-1-B)-B	CIMMYT	TST	tropical/subtropical	0.053	0.1485	0.7985
CIMBL157	(ZM305/[BETASYN]BC1-59-1-2-BBB)-B	CIMMYT	TST	tropical/subtropical	0.021	0.103	0.876
CIMBL16	((CML 288/NC300)-B-9-B-1-BBB)-B	CIMMYT	TST	tropical/subtropical	0.006	0.0715	0.9225
CIMBL17	((CML 326/B104)-B-9-BBBB)-B	CIMMYT	TST	tropical/subtropical	0.2174	0.3143	0.4683
CIMBL18	((CML161 x CL-02603)-B-22-2-2-1-BBBB)-B	CIMMYT	TST	tropical/subtropical	0.001	0.013	0.986
CIMBL19	((CML161xCML413)-Bx(CML172 x CML451)-BB-25-1-1-2-2-B)-B	CIMMYT	TST	tropical/subtropical	0.0025	0.0515	0.946
CIMBL20	((CML161xCML413)-Bx(CML172 x CML451)-B-B-25-1-1-3-2-B)-B	CIMMYT	TST	tropical/subtropical	0.009	0.026	0.965
CIMBL21	((CML285/NC300)-B-6-BBBB)-B	CIMMYT	TST	tropical/subtropical	0.0005	0.0305	0.969
CIMBL22	((CML454 x CL-02603)-B-20-1-2-BB)-B	CIMMYT	TST	tropical/subtropical	0.0005	0.0005	0.999
CIMBL24	((CML454 x CML451)-B-7-3-2-BB)-B	CIMMYT	TST	tropical/subtropical	0.0005	0.002	0.9975
CIMBL25	((CML479/CLQ-RCYQ41)-B-2-1-2-2-1-B)-B	CIMMYT	TST	tropical/subtropical	0.0005	0	0.9995
CIMBL26	((CML479/CLQ-RCYQ41)-B-2-1-2-2-2-B)-B	CIMMYT	TST	tropical/subtropical	0.0005	0	0.9995
CIMBL27	((CML479/CLQ-RCYQ41)-B-3-2-3-4-2-B)-B	CIMMYT	TST	tropical/subtropical	0	0	1
CIMBL28	((CML479/CLQ-RCYQ41)-B-53-1-1-2-1-B)-B	CIMMYT	TST	tropical/subtropical	0.0005	0	0.9995
CIMBL3	Suwan 1	Thailand	TST	tropical/subtropical	0	0	1
CIMBL30	((KU1409/DE3/KU1409)S2-18-2-BB)-B	CIMMYT	Mixed	tropical/subtropical	0.1155	0.4125	0.472
CIMBL32	((KU1409/KU1414-SR/KUI2007)-S2-2-1-BB)-B	CIMMYT	TST	tropical/subtropical	0.0005	0	0.9995
CIMBL33	((KU1409/KU1414-SR/KVI11)-S2-10-2-BB)-B	CIMMYT	TST	tropical/subtropical	0.0015	0.01	0.9885
CIMBL34	((KU1409/KU1414-SR/KVI3)-S2-3-2-BB)-B	CIMMYT	TST	tropical/subtropical	0.003	0.0455	0.9515
CIMBL38	((KU1409/KU1414-SR/SC213)-S2-10-1-BB)-B	CIMMYT	TST	tropical/subtropical	0.0185	0.0165	0.965
CIMBL40	((KU1409/SC55/KU1409)-S2-12-1-BB)-B	CIMMYT	TST	tropical/subtropical	0.007	0.077	0.916
CIMBL42	((NC300/Tx772)-B-1-B2-BB)-B	CIMMYT	TST	tropical/subtropical	0.009	0.1499	0.8411
CIMBL43	((P69Qc3HC107-1-1#-4-2#-4-B-B-1-4-B-B-B-B-BXCML193)-B-B-2-B-B-B)-B	CIMMYT	TST	tropical/subtropical	0.0625	0.3015	0.636
CIMBL44	((SYN-Y-STR-34-1-1-1-1-2-1-BBBBB/NC354/SYN-Y-STR-34-1-1-1-1-2-1-BBBBB)-S2-13-1-BB)-B	CIMMYT	TST	tropical/subtropical	0.02	0.0835	0.8966
CIMBL45	((Tx601XB104-B/B110XFR2128-B)-BB-4-BBB)-B	CIMMYT	Mixed	tropical/subtropical	0.0005	0	0.9995
CIMBL46	([[[NAW5867/P30SR]-43-2/[NAW5867/P30SR]-114-1]-9-3-3-B-1-B/CML395-1]-B-13-1-B-4-#/[BETASYN]BC1-8-1-1-1-1)-B	CIMMYT	TST	tropical/subtropical	0.006	0.1154	0.8786
CIMBL47	([DTPYC9-F11-2-3-1-1-BB x DTPYC9-F46-1-2-1-1-B]-B-1-1-B)-B	CIMMYT	Mixed	tropical/subtropical	0.011	0.183	0.806
CIMBL48	([DTPYC9-F46-1-2-1-1-B x DTPYC9-F74-1-1-1-1-BB]-B-4-1-B)-B	CIMMYT	TST	tropical/subtropical	0.004	0.0695	0.9265
CIMBL5	H5*PX105A/H101	USA	TST	tropical/subtropical	0.0035	0.074	0.9225
CIMBL50	([DTPYC9-F74-1-1-1-1-BB x DTPYC9-F65-2-2-1-1-BB]-B-3-2-B)-B	CIMMYT	TST	tropical/subtropical	0.001	0.0745	0.9245
CIMBL51	([GQL5/[GQL5/[MSRXPOOL9]C1F2-205-1(OSU23i)-5-3-X-X-1-B-B]F2-4sx]-8-6-BB/[BETASYN]BC1-6-5-1-1-1)-B	CIMMYT	TST	tropical/subtropical	0	0	1
CIMBL52	([GQL5/[GQL5/CML202]F2-1sx]-3-1-2-B/[BETASYN]BC1-2-5-1-1-1)-B	CIMMYT	TST	tropical/subtropical	0.006	0	0.994
CIMBL53	([SAM4/BETASYN]BC2FS1-1-1-1-BB)-B	CIMMYT	TST	tropical/subtropical	0.0025	0.0995	0.898
CIMBL55	([SAM4/BETASYN]BC2FS36-4-1-2-BB)-B	CIMMYT	TST	tropical/subtropical	0.0025	0.1094	0.8881
CIMBL56	([SAM4/BETASYN]BC2FS9-2-2-1-BB)-B	CIMMYT	TST	tropical/subtropical	0.0065	0.0315	0.962
CIMBL57	([ZM305/BETASYN]BC2-133-1-1-BB)-B	CIMMYT	TST	tropical/subtropical	0.0305	0.13	0.8395
CIMBL58	([ZM305/BETASYN]BC2-133-1-2-BBB)-B	CIMMYT	TST	tropical/subtropical	0.029	0.096	0.8749
CIMBL59	([ZM305/BETASYN]BC2-182-1-2-BB)-B	CIMMYT	TST	tropical/subtropical	0.018	0.0875	0.8945
CIMBL6	(Ac8730SR-##-124-1-5-B-1-#/[BETASYN]BC1-16-2-3-1-1)-B	CIMMYT	TST	tropical/subtropical	0.002	0.0445	0.9535
CIMBL62	(Carotenoid Syn3-FS4-2-4-BBB)-B	CIMMYT	TST	tropical/subtropical	0.003	0.0305	0.9665
CIMBL63	(Carotenoid Syn3-FS5-1-5-BB)-B	CIMMYT	TST	tropical/subtropical	0.013	0	0.987
CIMBL65	(CL-02841 Ac8928-40-1-1-1-1-B)-B	CIMMYT	TST	tropical/subtropical	0.0145	0.0735	0.912
CIMBL66	(CL-G1839 G18seqC3-17-1-1-2-2-B*5)-B	CIMMYT	TST	tropical/subtropical	0.0225	0.1055	0.872
CIMBL67	(CL-G2606 G26SeqC1-149-1-1-2-1-2-1-BB)-B	CIMMYT	TST	tropical/subtropical	0.035	0.0585	0.9065
CIMBL68	(CL-G2609 G26C23-75-1-1-2-1-B*5)-B	CIMMYT	TST	tropical/subtropical	0.0055	0.074	0.9205
CIMBL69	(CL-G2609-B)-B	CIMMYT	TST	tropical/subtropical	0.0275	0.1006	0.8719
CIMBL70	(CL-G2611 G26SEQF135-3-3-1-1-1-2-BB)-B	CIMMYT	TST	tropical/subtropical	0.0085	0.048	0.9435
CIMBL71	(CL-RCY007=PIO3011F2-B)-B	CIMMYT	TST	tropical/subtropical	0.0015	0.1105	0.888
CIMBL72	(CL-SCBY03)-B	CIMMYT	TST	tropical/subtropical	0.026	0.043	0.931
CIMBL73	(CML329/MBR C3 AmF25-2-1-1-BBB)-B	CIMMYT	TST	tropical/subtropical	0.0005	0	0.9995
CIMBL74	(CML445/[BETASYN]BC1-2-2-5-1-1)-B	CIMMYT	TST	tropical/subtropical	0.064	0	0.936
CIMBL75	(CML445/[BETASYN]BC1-9-2-3-1-1)-B	CIMMYT	TST	tropical/subtropical	0.114	0.058	0.828
CIMBL76	(CML488/[BETASYN]BC1-8-6-1-1-1)-B	CIMMYT	TST	tropical/subtropical	0.023	0.2156	0.7614
CIMBL77	(CML489/[BETASYN]BC1-2-#-B)-B	CIMMYT	TST	tropical/subtropical	0.024	0.0085	0.9675
CIMBL78	(CML489/[BETASYN]BC1-5-2-1-2-1)-B	CIMMYT	TST	tropical/subtropical	0.002	0	0.998
CIMBL79	(CML489/[BETASYN]BC1-7-2-1-1-1)-B	CIMMYT	TST	tropical/subtropical	0.0005	0	0.9995
CIMBL8	(((B104/NC300)x(CML-415/B104))-4-2-BB)-B	CIMMYT	TST	tropical/subtropical	0.3995	0.218	0.3825
CIMBL80	(CTS013174/SW(S)C11-42-1-BB-1-3-BBBB/Nei9202-B)-B	CIMMYT	TST	tropical/subtropical	0.0005	0.031	0.9685
CIMBL81	(Cuba / Guad C3 F125 -2-2-1-BBB)-B	CIMMYT	TST	tropical/subtropical	0.049	0.0415	0.9095
CIMBL82	(Cuba/Guad C3 F42-2-1-1-BBB)-B	CIMMYT	TST	tropical/subtropical	0.0325	0.012	0.9555
CIMBL84	(DTPYC9-74-1-1-1-1-B)-B	CIMMYT	TST	tropical/subtropical	0.0005	0.11	0.8895
CIMBL85	(DTPYC9-F11-2-3-1-2-B)-B	CIMMYT	TST	tropical/subtropical	0.0015	0.113	0.8855
CIMBL86	(DTPYC9-F116-2-1-1-1-B)-B	CIMMYT	TST	tropical/subtropical	0.0265	0.1149	0.8586
CIMBL87	(DTPYC9-F125-2-8-1-1-B)-B	CIMMYT	TST	tropical/subtropical	0.0295	0.083	0.8874
CIMBL88	(DTPYC9-F134-3-1-B)-B	CIMMYT	TST	tropical/subtropical	0.002	0.1074	0.8906
CIMBL89	(DTPYC9-F143-5-4-1-2-B)-B	CIMMYT	Mixed	tropical/subtropical	0.003	0.1575	0.8395
CIMBL9	(((B104/NC300X(CML285/B104))-2-3-B-B)-B	CIMMYT	TST	tropical/subtropical	0.2574	0.1719	0.5707
CIMBL90	(DTPYC9-F38-4-6-1-1-B)-B	CIMMYT	TST	tropical/subtropical	0.007	0.274	0.719
CIMBL91	(DTPYC9-F46-1-7-1-1-BBBB)-B	CIMMYT	TST	tropical/subtropical	0.001	0.1569	0.8421
CIMBL92	(DTPYC9-F46-3-9-1-2-B)-B	CIMMYT	TST	tropical/subtropical	0.006	0.095	0.8989
CIMBL93	(DTPYC9-F65-2-3-1-1-BBBBB)-B	CIMMYT	TST	tropical/subtropical	0.001	0.152	0.847
CIMBL94	(DTPYC9-F69-3-1-1-1-BBBBB)-B	CIMMYT	TST	tropical/subtropical	0.001	0.121	0.878
CIMBL95	(Florida A plus Syn-FS2-2-1-BB)-B	CIMMYT	Mixed	tropical/subtropical	0.0495	0.4635	0.487
CIMBL96	(KUI carotenoid syn-FS11-1-1-BBB)-B	CIMMYT	TST	tropical/subtropical	0.0005	0	0.9995
CIMBL97	(KUI carotenoid syn-FS17-3-1-BBB)-B	CIMMYT	TST	tropical/subtropical	0	0	1
CML113	P33C1F-B-129-B-###-2-B	CIMMYT	TST	tropical/subtropical	0.0185	0.126	0.8555
CML114	P45C2F-B-88-###1-1-2-BB	CIMMYT	TST	tropical/subtropical	0.057	0.2615	0.6815
CML115	P45C2F151(RIF)-#-5-1-2-BBB	CIMMYT	Mixed	tropical/subtropical	0.0155	0.1335	0.851
CML116	P45(STE)C1F36-5-1-3-1-BB	CIMMYT	Mixed	tropical/subtropical	0.0335	0.3277	0.6388
CML121	(PI218191/PI209135//PI226685/P1317328/3/P47/MPSWCB4) 6-3-1-5-1-B1-B1#B1(MP704/MP78:518)-8-3-4-B1-4-2-3-B1-B1-#B1	CIMMYT	TST	tropical/subtropical	0.0185	0	0.9815
CML122	(MP704/MP78:518)-8-3-4-B1-4-2-3-B1-B1#B1	CIMMYT	TST	tropical/subtropical	0.0115	0	0.9885
CML134	P45C2F151-1-2-5-3-1-2-4-B1-B1#B1	CIMMYT	TST	tropical/subtropical	0.038	0.3038	0.6582
CML139	MP78:518-15-B1-B1#B1	CIMMYT	TST	tropical/subtropical	0.013	0	0.987
CML162	G25QC1F18-8-1-2-BB-2-BBB	CIMMYT	TST	tropical/subtropical	0.024	0.033	0.943
CML165	P66C1F144-3-1-1-BB-1-BB-#	CIMMYT	TST	tropical/subtropical	0.014	0.0995	0.8865
CML166	P66C1F215-4-1-2-BB-2-BBB	CIMMYT	TST	tropical/subtropical	0.002	0.047	0.951
CML171	G25QS4B-H13-5-B-1-1-2-B-1-BBB	CIMMYT	TST	tropical/subtropical	0.0005	0.055	0.9445
CML172	G25QS4B-H35-2-B-1-1-2-B-4-BBBB	CIMMYT	TST	tropical/subtropical	0.0005	0.056	0.9435
CML189	G34QH17-2-1-1-B	CIMMYT	TST	tropical/subtropical	0.008	0.152	0.84
CML192	G34QH174-3-1-2-BB	CIMMYT	TST	tropical/subtropical	0.047	0.2859	0.6672
CML223	EV88SUWAN1SR(BC5)-3-1-2-BB	CIMMYT	TST	tropical/subtropical	0.0025	0	0.9975
CML225	EV88SUWAN1SR(BC5)-62-1-1-BB	CIMMYT	TST	tropical/subtropical	0	0	1
CML226	EV88SUWAN1SR(BC5)-78-1-1-BB	CIMMYT	TST	tropical/subtropical	0.003	0.0235	0.9735
CML228	EV88SUWAN1SR(BC5)-201-1-1-BB	CIMMYT	TST	tropical/subtropical	0.0005	0	0.9995
CML27	P27F1-1-3-B-###	CIMMYT	TST	tropical/subtropical	0.0015	0.0655	0.933
CML28	P27F35-8-3-B-####-B	CIMMYT	TST	tropical/subtropical	0.014	0.008	0.978
CML286	(CML- 286)-B	CIMMYT	TST	tropical/subtropical	0.05	0.1316	0.8184
CML287	(P24F26/27F1)-4-1-B-1-1-BB-F	CIMMYT	TST	tropical/subtropical	0.027	0.0215	0.9515
CML290	(P28/TSR)-33-3-7-3-1-BB-F	CIMMYT	TST	tropical/subtropical	0.0025	0.05	0.9475
CML298	SINTAMTSR-7-4-2-2-1-BB-F	CIMMYT	TST	tropical/subtropical	0.0065	0.0135	0.98
CML300	SINTAMTSR-76-1-2-3-1-BB-F	CIMMYT	TST	tropical/subtropical	0.0005	0	0.9995
CML304	SINTAMTSR-76-1-2-3-2-BB-F	CIMMYT	TST	tropical/subtropical	0.0005	0	0.9995
CML307	SINTAMTSR-61-3-2-8-2-BB-F	CIMMYT	TST	tropical/subtropical	0.0005	0	0.9995
CML32	P28(TSR)S2-11-2-4-B-1-##	CIMMYT	TST	tropical/subtropical	0.0025	0.066	0.9315
CML324	P33C2(STE)-12-1-B-2-B*4	CIMMYT	TST	tropical/subtropical	0.058	0.2629	0.6792
CML325	P45C6F28-1-2-B*6	CIMMYT	TST	tropical/subtropical	0.054	0.1874	0.7586
CML326	P45C6F6-2-1-1-B*5	CIMMYT	TST	tropical/subtropical	0.0835	0.254	0.6625
CML327	P45C6F83-3-1-B*5	CIMMYT	Mixed	tropical/subtropical	0.0465	0.2475	0.706
CML338	P590BF84-3-3-5-3-1-1-B-#-B	CIMMYT	TST	tropical/subtropical	0.027	0.045	0.928
CML360	SA4C2F(21/26)-1-2-2-2-B	CIMMYT	TST	tropical/subtropical	0.0025	0.028	0.9695
CML361	SA4C2F(21/26)-4-2-7-3-B	CIMMYT	TST	tropical/subtropical	0.011	0.0485	0.9405
CML364	SAF1-5-1-1-5-3-B	CIMMYT	TST	tropical/subtropical	0.0045	0.1201	0.8754
CML408	P24STEC2-29-BBBB-#-4-BBBBBBB	CIMMYT	TST	tropical/subtropical	0.001	0.0015	0.9975
CML411	P28C7-S4-#-BBBBBBBBBBB	CIMMYT	TST	tropical/subtropical	0.0035	0.014	0.9825
CML412	P36C5F279-1-1-B-F-##-B	CIMMYT	TST	tropical/subtropical	0.0035	0.071	0.9255
CML415	KC3001/KC3002-22-2-1-B-4-BBBBBBBB	CIMMYT	TST	tropical/subtropical	0.005	0.2264	0.7686
CML423	G18C19H100#-4-1-1-BBBBBBB	CIMMYT	TST	tropical/subtropical	0.025	0.084	0.8909
CML426	P31C4S5B-38-##-2-BBB	CIMMYT	TST	tropical/subtropical	0.013	0.0795	0.9075
CML428	SW91145-2P3S2-##-3-BBBB	CIMMYT	TST	tropical/subtropical	0.0125	0.119	0.8685
CML430	AMATLC0HS169-1-1-1-1-2-2-1-B*3	CIMMYT	TST	tropical/subtropical	0.041	0.0025	0.9565
CML432	KTX3752F2-7-1-1-1-BBB	CIMMYT	TST	tropical/subtropical	0.001	0.083	0.916
CML433	KTX3753F2-5-1-1-2-BBB	CIMMYT	TST	tropical/subtropical	0.0615	0.2545	0.684
CML451	[NPH28-1/G25)/NPH28]-1-2-1-1-3-1-B*6	CIMMYT	TST	tropical/subtropical	0.002	0.0225	0.9755
CML454	CAPITANMIRANDA8627-20-1-2-B*15	CIMMYT	TST	tropical/subtropical	0.0005	0	0.9995
CML465	AMATLC0HS71-1-1-2-1-1-1-BBB	CIMMYT	TST	tropical/subtropical	0.005	0.0275	0.9675
CML470	P31C4S5B-39-##-1-BB	CIMMYT	TST	tropical/subtropical	0.041	0.0765	0.8825
CML471	(CML- 471)-B	CIMMYT	TST	tropical/subtropical	0.021	0.118	0.861
CML473	P31C4S5B-23-##-4-BBBB	CIMMYT	TST	tropical/subtropical	0.0175	0.065	0.9175
CML479	(P24STE-5/24STE-17)-BBBB-###-B-3-B-1-B*4	CIMMYT	TST	tropical/subtropical	0.0005	0	0.9995
CML480	SINTAMTSRC2-88-2-2-B*8	CIMMYT	TST	tropical/subtropical	0.0165	0.001	0.9825
CML486	P45C8-76-1-2-1-2-BBBB	CIMMYT	TST	tropical/subtropical	0.0005	0.0075	0.992
CML493	P66C1F22-2-5-2-BBBB-3-BB	CIMMYT	TST	tropical/subtropical	0.024	0.023	0.953
CML496	P36C9F90-B-5-B*7	CIMMYT	TST	tropical/subtropical	0.0105	0.0835	0.906
CML497	[CL00331*v]-3-B-3-2-1-B*5	CIMMYT	TST	tropical/subtropical	0.011	0.008	0.981
CML50	AC8078-2-4-1-##	CIMMYT	TST	tropical/subtropical	0.005	0.1079	0.8871
CML51	STAROSA8079-1-2-3-###	CIMMYT	TST	tropical/subtropical	0.017	0.2404	0.7426
CML69	P36C5F37-2-1-1-B1#B1-B1#B1-B1	CIMMYT	TST	tropical/subtropical	0.003	0.0545	0.9425
D047	Landrace	China	Mixed	temperate	0.0005	0.2714	0.7281
D863F	D863F	China	NSS	temperate	0.174	0.588	0.238
Dan3130	American Hybrid P78599	China	NSS	temperate	0.1105	0.8455	0.044
Dan340	Lv9×Wide Pod Corn	China-V	NSS	temperate	0.284	0.6995	0.0165
Dan360	Lv9×Wide Pod Corn	China-V	NSS	temperate	0.6882	0.3118	0
Dan598	(Dan340×Danhuang11)×(Danhuang02×Dan599)	China	NSS	temperate	0.1076	0.5816	0.3108
Dan599	American Hybrid P78599	China	NSS	tropical/subtropical	0.082	0.5305	0.3875
DE.EX	The University of Illinois, USA	USA	NSS	temperate	0.2395	0.7275	0.033
DH3732	DH3732-1-1-2-2-1-1	China	Mixed	temperate	0.0255	0.5937	0.3808
Dong237	Synthetic	China	NSS	temperate	0.1365	0.65	0.2135
Dong46	M14	China	Mixed	temperate	0.0625	0.5485	0.389
DSB	Landrace	China	Mixed	temperate	0.0005	0.2521	0.7474
EN25	EN25	China	Mixed	temperate	0.039	0.4623	0.4988
FCD0602	FCD0602	China	Mixed	temperate	0.706	0.2695	0.0245
GEMS1	PI503806xB94///B94	USA	SS	temperate	0.343	0.5065	0.1505
GEMS10	2112-02_DK212T_S11_F2S4_9169-Blk20/00	USA	SS	temperate	0.7065	0	0.2935
GEMS11	2116-02_DK212T_S11_F2S4_9172-Blk28/00	USA	SS	temperate	0.713	0	0.287
GEMS12	2120-01_DK888_S11_F2S4_9175-Blk28/00	USA	SS	temperate	0.648	0	0.352
GEMS13	2121-04_DK888_S11_F2S4_9178-Blk29/00	USA	SS	temperate	0.6855	0	0.3145
GEMS14	2127-01_DK888_S11_F2S4_9181-Blk21/00	USA	SS	temperate	0.7215	0	0.2785
GEMS15	2131-01_DK888_S11_F2S4_9184-Blk20/00	USA	TST	temperate	0.6065	0	0.3935
GEMS16	2132-03_DK888_S11_F2S4_9187-Blk22/00	USA	TST	temperate	0.6925	0	0.3075
GEMS17	2142-01_DK888_S11_F2S4_9190-Blk19/00	USA	SS	temperate	0.7005	0	0.2995
GEMS18	2143-02_DK888_S11_F2S4_9193-Blk19/00	USA	SS	temperate	0.7325	0	0.2675
GEMS19	2146-01_DK888_S11_F2S4_9196-Blk29/00	USA	TST	temperate	0.5625	0	0.4375
GEMS2	FS8A(S):S09-43-2	USA	TST	temperate	0.3682	0.2806	0.3512
GEMS20	2150-01_DK888_S11_F2S4_9199-Blk16/00	USA	SS	temperate	0.7385	0	0.2615
GEMS21	2152-02_DK888_S11_F2S4_65/97-Blk/97-99	USA	SS	temperate	0.977	0	0.023
GEMS23	2156-02_DK888_S11_F2S4_h92847-Blk13/00	USA	SS	temperate	0.6425	0	0.3575
GEMS24	2201-01_DK830_S11_F2S4_9208-Blk27/00	USA	TST	temperate	0.3013	0.2164	0.4823
GEMS25	2226-02_XL370A_S11_F2S4_9211-Blk25/00	USA	Mixed	temperate	0.1704	0.2339	0.5957
GEMS27	2250-01_XL370A_S11_F2S4_9214-Blk21/00	USA	Mixed	temperate	0.28	0.1715	0.5485
GEMS28	2250-02_XL370A_S11_F2S4_3363-Blk03/00	USA	Mixed	temperate	0.658	0.088	0.254
GEMS29	2253-01_XL370A_S11_F2S4_9220-Blk24/00	USA	Mixed	temperate	0.3465	0.3205	0.333
GEMS3	2011-01_SE32-S17_F2S4_9148-Blk22/00	USA	Mixed	temperate	0.2911	0.3267	0.3822
GEMS30	2258-03_XL380_S11_F2S4_71/97-Blk/98	USA	TST	temperate	0.316	0.0955	0.5885
GEMS31	2282-01_XL380_S11_F2S4_9226-Blk26/00	USA	TST	temperate	0.26	0.1705	0.5695
GEMS32	2283-01_XL380_S11_F2S4_9229-Blk20/00	USA	Mixed	temperate	0.2095	0.2255	0.565
GEMS33	PE001n16F2S2-44	USA	NSS	temperate	0.101	0.7275	0.1715
GEMS36	PE001n16F2S2-176	USA	NSS	temperate	0.0635	0.644	0.2925
GEMS37	PE001n16F2S2-181	USA	NSS	temperate	0.0505	0.6687	0.2809
GEMS39	PE001n16F2S2-239	USA	NSS	temperate	0.0875	0.6465	0.266
GEMS4	2084-02_DK212T_S11_F2S4_9151-Blk38/00	USA	SS	temperate	0.6295	0	0.3705
GEMS40	PE001n16F2S2-431	USA	NSS	temperate	0.066	0.621	0.313
GEMS41	PE001n16F2S2-521	USA	NSS	temperate	0.044	0.7085	0.2475
GEMS42	PE001n16F2S2-705	USA	NSS	temperate	0.053	0.6242	0.3228
GEMS43	PE001n16F2S2-857	USA	NSS	temperate	0.072	0.767	0.161
GEMS44	CH05015:N12-140-1-B-B	USA	Mixed	temperate	0.0965	0.5755	0.328
GEMS45	CH05015:N12-20-1-B-B	USA	Mixed	temperate	0.0976	0.5428	0.3597
GEMS46	CH05015:N15-8-1-B-B	USA	Mixed	temperate	0.0595	0.619	0.3215
GEMS47	UR13085:N0125-014-001	USA	NSS	temperate	0.0835	0.784	0.1325
GEMS48	DKXL370:N11a20-31-1-B-B	USA	NSS	temperate	0.0945	0.7365	0.169
GEMS49	DKB844:S1601-512-1-B	USA	SS	temperate	0.7995	0.103	0.0975
GEMS5	2086-01_DK212T_S11_F2S4_9154-Blk20/00	USA	SS	temperate	0.7075	0	0.2925
GEMS50	DKB844:S1601-517-1-B	USA	SS	temperate	0.678	0.1635	0.1585
GEMS51	CUBA164:S2008a-83-1-B	USA	SS	temperate	0.8504	0.095	0.0545
GEMS52	CUBA164:S2008a-326-1-B	USA	SS	temperate	0.9055	0.006	0.0885
GEMS53	CUBA164:S15-192-2-B	USA	SS	temperate	0.823	0	0.177
GEMS54	ARI16035:S02-450-1-B	USA	TST	temperate	0.4932	0.1596	0.3472
GEMS55	ARI16035:S02-443-1-B-B	USA	SS	temperate	0.749	0.098	0.153
GEMS56	FS8B(T):N1809-946-1-B	USA	NSS	temperate	0.0565	0.8021	0.1414
GEMS57	ARI01150:N04-545-1-B	USA	NSS	temperate	0.044	0.9495	0.0065
GEMS58	ARI01150:N04-696-1-B	USA	NSS	temperate	0.069	0.8735	0.0575
GEMS59	SCROI:N1310-398-1-B	USA	NSS	temperate	0.138	0.7895	0.0725
GEMS6	2088-01_DK212T_S11_F2S4_9157-Blk29/00	USA	SS	temperate	0.6895	0	0.3105
GEMS60	CHIS775:N1912-519-1-B-B	USA	NSS	temperate	0.099	0.741	0.16
GEMS61	ARI16026:S17-10-1-B-B	USA	TST	temperate	0.5628	0.1426	0.2946
GEMS62	ARI16026:S16-10-1-B-B	USA	TST	temperate	0.7013	0.1131	0.1856
GEMS63	CUBA164:S1511b-325-001	USA	SS	temperate	0.9325	0	0.0675
GEMS64	CUBA164:S1511b-249-1-B-B	USA	SS	temperate	0.9505	0	0.0495
GEMS65	CUBA117:S1520-41-1-B-B	USA	SS	temperate	0.789	0.083	0.128
GEMS66	CUBA117:S1520-52-1-B-B	USA	SS	temperate	0.8235	0.058	0.1185
GEMS9	2111-01_DK212T_S11_F2S4_9166-Blk31/00	USA	SS	temperate	0.7235	0	0.2765
Gy1007	AIHO	China	NSS	temperate	0.0715	0.7809	0.1476
Gy1032	AIHO	China	NSS	temperate	0.1105	0.7755	0.114
Gy220	AIHO*	China	NSS	temperate	0.0055	0.993	0.0015
Gy237	AIHO	China	NSS	temperate	0.039	0.8454	0.1156
Gy386	AIHO	China	NSS	temperate	0.002	0.9975	0.0005
GY386B	Unknown	China	NSS	temperate	0.002	0.997	0.001
Gy462	AIHO	China	NSS	temperate	0.0225	0.8655	0.112
Gy923	AIHO	China	NSS	temperate	0.011	0.973	0.016
HB	Huojiabaimaya	China	Mixed	temperate	0.0275	0.391	0.5815
Hua83-2	Landrace	China	Mixed	temperate	0.052	0.4487	0.4992
HuangC	(HuangXiao162×Zi330/O2)×Tuxpenno	China-V	NSS	temperate	0.2615	0.5785	0.16
HYS	(HuangZaoSi×YeJiHong)×HuangZaoSi	China	Mixed	temperate	0.0005	0.5475	0.452
IRF291	A671×LH38	China	NSS	temperate	0.071	0.9035	0.0255
IRF314	(PA91/LH98A)-6-420-64-2-1-3-1-1-1	China	NSS	temperate	0.034	0.963	0.003
J4112	A619×U8112	China	Mixed	temperate	0.642	0.3555	0.0025
JH59	American Hybrid P78599	China	NSS	temperate	0.0545	0.9455	0
JH96C	Synthetic	China	NSS	temperate	0.102	0.5848	0.3132
Ji63	(127-32×Tie84)×(Wei24×Wei20)	China	NSS	temperate	0.1195	0.686	0.1945
Ji846	Ji63×Mo17	China	NSS	temperate	0.048	0.951	0.001
Ji853	(HuangZaoSi×Zi330)×Zi330	China	Mixed	temperate	0.0065	0.6505	0.343
Jiao51	Improved from Landrace	China	Mixed	temperate	0.0005	0.2931	0.7064
JY01	JiYan01-3-2-2-1-5-1	China	NSS	temperate	0.1845	0.6605	0.155
K10	(Chang3×Shen5003)×Chang3	China	NSS	temperate	0.1105	0.579	0.3105
K14	Shen5005×6917	China	NSS	temperate	0.2176	0.6543	0.1281
K22	K11×Ye478	China	NSS	temperate	0.351	0.602	0.047
L3180	Foreign hybrid	China	Mixed	temperate	0.464	0.5345	0.0015
LG001	辽 001	China	NSS	temperate	0.1146	0.5223	0.3632
Liao159	辽 159	China	Mixed	temperate	0.4605	0.5375	0.002
Liao5114	Tie7922×Shen5003	China	Mixed	temperate	0.664	0.3165	0.0195
Liao5262	Liao526-2-2-2-1-2-1	China	NSS	temperate	0.399	0.4405	0.1605
Liao5263	Liao526-2-2-2-1-3-1	China	NSS	temperate	0.363	0.518	0.119
LK11	Mo17×Zi330	China	NSS	temperate	0.0005	0.999	0.0005
Lv28	LvDaHongGu	China	NSS	temperate	0.1071	0.5923	0.3007
Lx9801	Xi502×H21	China	NSS	temperate	0.0005	0.6435	0.356
LXN	Landrace	China	NSS	temperate	0.0845	0.5107	0.4048
LY	LY	China	TST	temperate	0.0025	0.09	0.9075
LY042	LY042	China	NSS	temperate	0.2335	0.661	0.1055
M153	M153	China	NSS	temperate	0.2685	0.691	0.0405
M165	M165	China	NSS	temperate	0.2645	0.674	0.0615
M97	M97	China	NSS	temperate	0.264	0.656	0.08
MO113	Unknown	China	NSS	temperate	0.063	0.9205	0.0165
Mo17	187-2×C103	China-V	NSS	temperate	0.0005	0.9995	0
Nan21-3	Jugoslavian Hybrid	China	Mixed	tropical/subtropical	0.4146	0.4755	0.1099
NMJT	Landrace	China	Mixed	temperate	0.001	0.3445	0.6545
P138	American Hybrid P78599	China-V	NSS	tropical/subtropical	0.0855	0.6252	0.2894
P178	American Hybrid P78599	China-V	NSS	tropical/subtropical	0.0805	0.6987	0.2209
Q1261	Improved from K12	China	NSS	temperate	0.197	0.575	0.228
Qi319	American Hybrid P78599	China	NSS	tropical/subtropical	0.1315	0.5835	0.285
R08	American Hybrid P78641	China	NSS	temperate	0.1171	0.6303	0.2526
R15X1141	R15*X1141P-3-3-3-1-1-2	China	NSS	temperate	0.1375	0.5615	0.301
Ry697	RYD	China	Mixed	temperate	0.1631	0.6398	0.1971
Ry713	RYD	China	NSS	temperate	0.1834	0.6307	0.1859
Ry729	RYD	China	Mixed	temperate	0.143	0.7225	0.1345
Ry737	RYD	China	Mixed	temperate	0.1525	0.674	0.1735
S22	American Hybrid	China	NSS	temperate	0.0005	0.756	0.2435
S37	Suwan1	China	TST	tropical/subtropical	0.002	0.1031	0.8949
SC55	The University of Illinois, USA	USA	Mixed	tropical/subtropical	0.0565	0.3933	0.5502
Shen135	沈 135	China	Mixed	temperate	0.1555	0.4985	0.346
Shen137	American Hybrid 6JK611	China-V	NSS	tropical/subtropical	0.0585	0.4882	0.4532
Shen5003	American Single-cross 3147	China-V	NSS	temperate	0.2457	0.6476	0.1066
Si444	A619×HuangZaoSi	China	NSS	temperate	0.091	0.685	0.224
Si446	Qu43×Zi330	China	NSS	temperate	0.0015	0.9985	0
SW92E114	Landrace	China	TST	temperate	0.003	0.0965	0.9005
Sy1032	Syn.D.O	China	Mixed	temperate	0.1245	0.617	0.2585
Sy1035	Syn.D.O	China	NSS	temperate	0.2135	0.634	0.1525
Sy1039	Syn.D.O	China	NSS	temperate	0.124	0.742	0.134
Sy1077	Syn.D.O	China	Mixed	temperate	0.235	0.615	0.15
Sy1128	Syn.D.O	China	NSS	temperate	0.162	0.741	0.097
Sy3073	Syn.D.O	China	NSS	temperate	0.13	0.671	0.199
Sy999	Syn.D.O	China	NSS	temperate	0.1699	0.6947	0.1354
Tian77	(HuangXiao162×Mei1865)×(187-2×Nan55)	China	Mixed	temperate	0.003	0.4365	0.5605
Tie7922	American Hybrid 3382	China	SS	temperate	0.8305	0.1695	0
TT16	TianTai16-1-3-1-2-2-2	China	Mixed	temperate	0.195	0.512	0.293
TX5	Landrace	China	NSS	temperate	0.0075	0.5485	0.444
TY1	TY30331-2-4-2-1-3-2	China	Mixed	temperate	0.0415	0.4178	0.5407
TY10	TY30331-2-8-1-1-3-2	China	Mixed	temperate	0.0795	0.343	0.5775
TY3	TY30331-2-4-2-2-2-1	China	Mixed	temperate	0.0555	0.396	0.5485
TY4	TY30331-2-4-2-2-2-2	China	Mixed	temperate	0.047	0.404	0.549
TY5	TY30331-2-4-2-2-3-1	China	Mixed	temperate	0.054	0.3865	0.5595
TY6	TY30331-2-5-1-2-3-2	China	Mixed	temperate	0.0365	0.3045	0.659
TY8	TY30331-2-7-1-2-1-1	China	Mixed	temperate	0.0774	0.3452	0.5774
U8112	American Hybrid 3382	China	SS	temperate	0.9575	0.0425	0
WH413	HuangZaoSi×WenQing1331	China	Mixed	temperate	0.023	0.5075	0.4695
WMR	Landrace	China	Mixed	temperate	0.05	0.4135	0.5365
Wu109	XiDan7	China	Mixed	temperate	0.059	0.4882	0.4527
Xun971	Landrace	China	Mixed	temperate	0.6675	0.3325	0
XZ698	XinZhong698-3-1-1-2-1-2-3	China	NSS	temperate	0.119	0.595	0.286
Yan414	HuangZaoSi	China	Mixed	temperate	0.1036	0.5268	0.3697
Ye107	Foreign Hybrid XL80	China-V	Mixed	temperate	0.235	0.5795	0.1855
Ye478	U8112×Shen5003	China-V	Mixed	temperate	0.6583	0.3417	0
Ye515	(HuaFeng100×AiGo352)×HuangZaoSi	China-V	Mixed	temperate	0.0665	0.5975	0.336
Ye52106	(Ye1075×Ye106)×AiJin525	China-V	NSS	temperate	0.091	0.686	0.223
Ye8001	Ye488×3189	China-V	Mixed	temperate	0.6188	0.3807	0.0005
Yu374	Synthetic	China-V	NSS	temperate	0.087	0.8696	0.0435
Yu87-1	American Hybrid	China-V	NSS	temperate	0.19	0.488	0.322
Yun46	Yun46	China	TST	tropical/subtropical	0.0025	0	0.9975
Z2018F	Zheng2018F2*698-3-1-2-1-1	China	Mixed	temperate	0.3245	0.424	0.2515
ZaC546	Variant plants from C103	China	NSS	temperate	0.099	0.8125	0.0885
ZB648	ZhongBei648-1	China	NSS	temperate	0.008	0.657	0.335
ZH68	American Hybrid P78599	China	SS	temperate	0.8931	0.1064	0.0005
Zheng22	Dan340×E28	China	Mixed	temperate	0.1614	0.5232	0.3153
Zheng28	Ye478×Tuxpeno	China	NSS	temperate	0.1215	0.6555	0.223
Zheng29	Shen5003	China	Mixed	temperate	0.677	0.3225	0.0005
Zheng30	Zheng20×Ye478	China	NSS	temperate	0.169	0.7	0.131
Zheng32	American Single-cross 3382	China	SS	temperate	1	0	0
Zheng35	Unkown	China	Mixed	temperate	0.6778	0.3217	0.0005
Zheng58	Variant plants from Ye478	China-V	NSS	temperate	0.338	0.662	0
Zhi41	直41	China	NSS	temperate	0.0025	0.8365	0.161
Zhong69	American Hybrid P78599	China	Mixed	temperate	0.2011	0.4027	0.3962
Zi330	OH43×KeLi67	China	NSS	temperate	0.0005	0.999	0.0005
Zong31	Synthetic	China-V	NSS	temperate	0.0335	0.883	0.0835
ZZ01	American Hybrid P78641	China	NSS	temperate	0.058	0.693	0.249
ZZ03	中自03	China	NSS	temperate	0.105	0.7035	0.1915
Note: SS: Stiff stalk; NSS: Non-stiff stalk; TST: Tropical-subtropical; Mixed, mixed group.

## Sheet: Table S2
Table S2. The phenotypic data of eight root traits.
Lines	AREA (mm2)	AVG_DENSITY	WIDTH_MED (mm)	WIDTH_MAX (mm)	ANG_TOP (degrees)	ANG_BTM (degrees)	SKL_WIDTH (mm)	RTP_COUNT
CML465	20497	11.6661	144.732	171.695	67.3261	48.6424	177.981	336
CIMBL133	7734.38	5.65114	76.5756	99.8199	49.1078	32.7762	109.549	267.667
CIMBL62	13978.2	5.92604	112.681	129.84	62.8753	42.5545	132.254	476.333
CML69	12519.5	8.03886	120.554	158.994	66.1807	50.3718	162.417	572.333
CIMBL5	10950.4	9.70589	105.31	134.535	65.1552	48.9924	140.046	224.6
CIMBL33	10015.5	4.46075	154.597	203.773	68.0295	55.5983	215.905	535
CIMBL139	7327.92	3.64829	99.8173	145.904	64.4108	47.2987	149.121	300.667
CIMBL11	19016.6	8.48548	164.378	208.776	70.6648	53.5495	218.35	446.2
CIMBL63	11283.7	2.57542	142.166	196.447	68.7784	53.6025	198.716	417
CIMBL76	6833.21	3.11817	102.112	128.834	61.5639	44.1966	136.659	388.667
SC55	13849.6	7.21453	128.309	172.94	60.9235	45.8112	178.942	206.5
CIMBL148	11191.9	11.5194	98.5448	128.612	60.368	43.2925	135.985	359
CML493	13564.8	6.83023	114.46	158.609	57.4544	43.0251	163.779	333.667
CIMBL155	12734.1	10.0645	107.931	144.001	58.7779	41.6347	146.515	394
CIMBL149	8864.83	6.11649	96.84	126.013	61.4642	42.3228	129.791	219.667
CML479	14158.8	2.40375	133.718	157.947	63.8013	45.1092	159.849	656
CML139	12886.4	2.8828	123.364	163.397	65.581	49.8208	167.681	624.667
CML307	8410.54	4.37696	78.736	107.955	56.4327	37.2572	116.572	435.667
CIMBL107	14300.2	6.25965	103.264	137.178	56.1973	40.6664	144.03	526
CML480	11864.6	4.8146	108.824	133.577	61.4163	41.9557	138.531	602
CIMBL50	9171.95	4.03345	115.441	136.062	62.0546	46.4984	142.876	413.667
CIMBL52	7862.11	5.8214	78.0182	111.085	54.4132	39.3111	114.329	344.333
CML165	8260.7	3.73985	95.6177	123.492	61.3892	42.9415	136.36	194.5
CIMBL92	10021	5.78962	105.166	132.662	58.9013	42.4527	139.747	449.333
CIMBL27	14691.7	6.02048	137.834	162.581	65.8742	49.8571	171.841	731
CML430	16701.4	12.7887	131.264	162.559	64.3509	50.0071	170.62	650.667
CIMBL12	14474.2	11.4268	111.929	144.066	61.922	44.4343	151.549	611.333
CML426	9019.08	11.7492	88.9936	112.394	58.291	39.6659	116.485	263.667
CIMBL26	10854.5	8.93262	100.706	121.04	64.3158	45.5176	125.754	515.667
CIMBL14	10313.2	1.98277	140.219	228.408	68.3607	57.5113	249.737	608
CML304	15255.1	5.31815	125.633	159.731	62.9186	45.9604	163.733	518.333
CIMBL15	11138.3	5.56811	114.89	151.474	66.0577	49.1512	160.148	429.667
CML223	14516.4	10.4245	120.723	162.298	60.4089	46.5824	166.554	466.25
CIMBL28	12337.7	8.66904	120.573	142.101	65.4237	46.4333	148.831	264.667
P138	12415.1	3.35374	116.203	162.155	58.364	44.6595	169.256	414
CML134	10529	7.9974	115.99	168.964	57.6734	44.4094	178.24	440.333
CIMBL6	13341.3	6.14382	106.727	140.31	58.7813	38.7226	143.745	346.667
CML114	11907.8	14.4022	87.1656	105.94	54.3185	34.3219	111.344	306.667
CIMBL70	16405.3	6.13053	115.833	141.446	64.9979	41.1515	146.151	351
CIMBL65	17038	7.71299	122.479	164.989	62.1586	48.1224	167.113	446.667
CIMBL42	9045.94	2.91954	120.191	161.396	62.0439	46.2014	160.58	363
CIMBL106	14708	16.4285	110.932	140.472	63.4101	45.6404	147.034	410.667
CML496	13838.8	3.37541	130.925	189.599	65.0767	52.8467	196.56	586
CIMBL111	11133.9	7.15366	94.8824	123.355	57.3088	40.338	132.633	550.667
CIMBL144	8425.16	7.47096	98.7827	120.647	61.3244	40.7032	139.92	326.333
CIMBL79	9258.11	8.26298	86.947	115.644	55.4431	38.62	123.415	351.667
CIMBL91	10008.3	4.32069	95.9347	126.754	58.9349	42.5014	129.954	444
CML192	12073	7.86976	127.515	175.613	65.841	50.4061	184.157	293
CML486	12550	4.46514	120.245	155.272	67.0596	49.2097	163.713	302.8
CIMBL95	13056.4	1.91499	158.421	207.899	68.1245	56.5381	215.558	774.333
CML454	20737.3	13.8855	143.627	201.18	58.0643	47.5323	209.094	428.333
CIMBL152	13716.6	4.85663	110.678	141.554	58.4728	41.8232	147.53	330
CIMBL89	13494.3	8.88724	106.868	136.827	55.6215	38.2958	140.589	340
YUN46	14327.1	14.1045	102.52	132.591	64.2288	43.5622	138.088	239.667
CML121	10148.3	8.37561	91.4432	110.281	56.9295	37.351	113.399	313.333
CIMBL32	9400.18	9.17149	91.5067	122.466	57.3704	38.9504	126.434	331.667
CIMBL124	13882	2.43297	160.157	242.414	68.9564	57.8463	252.995	899
CIMBL115	11621.9	6.6971	96.6678	164.07	65.3661	37.3882	168.898	238
CIMBL128	14815.2	2.76549	160.916	229.539	69.1974	55.9073	230.399	546.333
CIMBL129	9978.5	5.25737	88.4031	112.883	58.7933	38.2362	120.279	430.667
CIMBL93	10278.2	3.53156	106.066	133.742	63.4704	43.7422	137.71	418.667
CIMBL10	14353.4	7.51036	128.128	151.509	64.9253	47.3034	161.298	524
CIMBL119	18346.3	13.7941	150.575	193.34	68.6855	53.4465	201.54	589
CIMBL40	12984.1	2.42768	117.846	170.875	62.0003	46.1617	180.381	604.333
CIMBL94	10285.2	5.32863	102.23	123.393	59.6265	40.3041	128.126	375
CIMBL105	13661.3	26.4864	86.0652	110.089	57.7313	35.5541	115.064	258.667
CIMBL3	17991.7	12.3867	114.544	140.839	59.826	41.4689	147.11	467
DAN599	16421.1	6.36142	122.587	176.453	62.0907	48.9388	188.225	447
CML171	16815.6	29.298	124.73	158.93	67.9265	50.2017	160.712	428
CML166	9205.97	3.78862	94.6889	120.618	57.6376	40.9212	129.015	449.667
CIMBL18	12564.8	7.08132	109.352	173.594	64.8402	52.273	177.226	515.5
CIMBL80	15217.8	8.94209	105.2	138.693	58.0977	40.2189	148.964	583
CML50	19157.3	16.2476	129.577	164.847	63.9692	47.4442	172.938	533.667
CIMBL34	13928	4.997	129.315	157.291	57.0468	43.9462	166.202	575.5
CIMBL109	15443.6	11.5442	117.452	152.985	63.2362	47.1289	158.253	641
S37	15565.9	5.44933	137.932	190.754	64.7156	52.7881	196.525	526.333
CIMBL84	8328.32	5.06084	78.2748	114.088	57.0862	41.3209	121.279	356
CIMBL97	17189.6	4.47937	133.611	164.354	65.8886	46.1667	170.541	660.667
CIMBL137	9202.5	11.0942	84.1152	107.754	52.9236	35.7512	113.428	286.667
CML51	15621.4	23.277	120.22	158.132	67.4786	53.0148	163.594	192.333
CIMBL67	10087	2.77016	104.681	137.956	60.4551	42.9255	142.998	483.333
CIMBL154	10810.5	2.23537	134.089	187.782	65.0126	53.3461	197.376	651.667
CIMBL72	12636.9	4.36322	109.472	144.917	65.9222	49.6537	152.977	277.333
CIMBL21	7755.28	5.94228	88.4704	109.615	61.501	40.19	118.562	226
CIMBL51	11214.5	15.4122	86.8532	116.087	60.0049	40.7809	119.389	421
CML324	14376.5	3.84537	106.291	149.481	54.2936	43.1611	153.321	576.667
CML412	9174.25	11.6102	99.162	125.654	62.1401	46.1506	133.173	325.333
CIMBL24	14478.9	3.35805	134.977	180.569	65.7291	53.5395	191.409	635.333
CML433	13742.2	10.4337	112.138	152.26	66.5007	50.1307	159.346	235
CIMBL71	11965.4	4.46149	113.944	138.825	66.5552	47.956	143.687	531.333
QI319	12356.5	2.82092	126.547	156.426	62.8772	46.5211	164.579	488
CIMBL102	10940.1	5.19212	121.687	146.03	66.6906	49.8092	155.763	539.5
CIMBL123	10769.8	4.33947	120.207	147.064	63.5577	45.1329	155.668	622.667
CIMBL88	9703.42	7.4345	83.4104	123.975	53.9059	39.7942	128.601	206
CML32	10483.8	6.17489	78.2602	102.973	52.0033	34.7261	107.747	454.667
CIMBL57	13052	3.98778	116.426	139.546	68.2684	46.9864	146.804	253.667
CML423	10924	7.2322	106.591	158.523	62.0179	44.0847	159.57	419
CML360	10976.8	7.9205	111.094	143.524	59.5986	43.7587	151.758	421.333
CIMBL117	11132.9	21.3035	92.5265	135.163	56.172	40.9504	141.439	295.5
CML471	10618.8	4.13249	92.2748	119.089	57.1308	37.3435	122.518	429.667
CML162	18705.6	7.67867	127.853	164.371	62.7311	46.09	168.596	450.333
CIMBL150	7280.69	3.07795	132.767	207.716	59.8343	51.9468	211.881	367.667
CIMBL118	12983.7	2.68467	141.296	206.942	63.5857	52.4905	212.416	703
CIMBL46	9760.25	5.05398	90.2327	119.345	61.8492	42.4537	128.604	466.667
CML300	11187.9	11.3351	112.402	146.006	64.254	48.8083	159.738	292.333
CML338	6947.12	8.68853	77.825	118.76	60.7231	44.2661	124.754	281.667
CIMBL120	8220.63	6.18409	98.5836	126.184	63.7719	44.9712	141.218	411.667
CML115	11505.5	14.9464	81.5206	101.732	52.39	33.3081	105.587	234
CIMBL9	11250.7	11.7518	105.495	144.978	65.3525	50.8941	154.496	260.333
CML172	15147.8	14.0755	112.104	146.514	64.581	47.2413	149.348	469
CIMBL38	11359	11.2553	92.8402	128.071	59.5125	42.5055	136.185	296
CIMBL1	11111.5	11.3314	83.7016	104.549	56.4505	34.2356	113.109	177
CIMBL86	11110.3	2.89447	116.888	149.943	64.0993	46.6031	153.235	538
CML327	12379.4	8.37987	113.738	149.246	63.9744	50.1268	153.419	501
CIMBL126	10410.2	3.2613	105.353	134.842	65.6681	47.4788	138.572	515
CIMBL96	7388.93	9.48562	74.7245	106.408	55.6116	35.2064	112.103	283.667
CIMBL114	14550.3	8.18158	114.401	145.975	69.0411	49.6408	149.532	559.333
CIMBL45	9214.16	6.14264	88.2737	122.32	58.8082	40.3841	128.474	197.6
CML122	12668.3	2.87561	139.247	180.795	67.3607	53.2594	185.134	413.667
CIMBL73	8976.27	4.89045	121.003	159.458	63.6996	48.4441	171.859	299.333
CIMBL30	11035.7	5.46948	137.154	173.813	68.1915	52.6394	177.998	597.333
CML116	9251.17	5.0227	105.239	138.581	62.5006	45.3021	142.353	584
CML361	11937.2	11.6483	105.305	139.981	61.7381	43.9959	145.491	292
CIMBL136	14021.8	3.35265	131.201	166.298	64.1181	48.1417	168.887	735.333
CIMBL101	14233.7	11.3441	121.435	151.999	64.4431	46.8838	159.816	459.667
CML415	13019.1	8.83015	102.204	131.64	58.2155	40.9585	137.386	431.333
CIMBL142	16213.4	9.47273	117.657	139.853	64.8391	43.8181	144.62	537
SHEN137	13225	3.19427	114.422	144.883	62.4186	44.6239	153.682	623.667
CIMBL127	12257.8	6.15992	121.859	153.01	63.3535	48.2745	159.513	624
CIMBL53	10741.9	3.36676	106.926	126.316	64.5318	42.4551	137.203	387.333
CML470	8110.79	7.9774	95.1758	114.611	62.2248	41.4628	116.769	264.667
CIMBL151	13286.4	7.81405	107.869	141.593	61.3136	43.7975	144.826	394
P178	8536.05	5.99539	91.2207	111.873	59.7651	38.4355	118.729	356
CIMBL68	12528.6	9.0246	115.965	146.17	64.1582	46.8024	151.684	323
CIMBL55	12773	2.70395	126.436	162.43	64.7127	49.127	167.336	332.667
CIMBL82	18312	7.20796	154.267	184.216	66.9531	51.2182	189.232	594
CIMBL121	16092.8	12.2962	113.866	147.65	63.4355	44.7968	157.167	281.667
CIMBL16	12164.7	12.059	107.352	131.675	63.9635	43.7178	135.901	465.667
CIMBL74	11867	5.86834	121.591	156.177	63.8795	45.5444	164.769	348.333
CML228	12132.8	3.54668	121.253	151.48	66.7875	47.9629	155.846	254
CIMBL8	9468	5.54536	127.704	148.168	68.4667	46.3211	154.559	392.667
647	8060.45	3.59805	101.846	128.964	61.3351	42.166	137.083	455
CIMBL25	16424.5	6.95147	124.581	176.234	58.3726	44.547	185.804	471.667
CML364	9981.09	4.4555	105.579	130.324	62.9888	43.2146	137.756	410
CIMBL78	13810.4	8.18618	116.216	136.169	64.2993	44.7456	139.632	393.667
CML411	16341.5	10.5009	115.641	144.296	60.1667	40.2386	150.182	225.333
CIMBL138	10561.6	11.1992	91.8046	122.558	63.7358	45.1538	126.076	350
CIMBL112	8916.96	11.5202	80.5073	98.1459	60.6588	37.1106	105.454	246.333
CIMBL122	9121.21	2.89005	132.5	156.911	71.7278	56.4016	160.167	500
CML27	17543.9	8.78878	134.469	184.053	64.3838	51.3304	191.569	346
CML497	8546.42	7.97545	101.709	126.771	69.3196	48.1469	131.917	482.5
CIMBL90	7452.47	5.13358	68.1937	79.2544	55.0118	29.788	89.6105	367.5
CIMBL77	19732.8	4.99596	168.604	199.721	70.239	55.3968	205.24	670.333
CIMBL47	8936.13	2.3038	141.808	186.8	67.5825	51.967	192.048	354
CIMBL43	9891.3	3.77424	97.3639	118.554	64.7771	43.5268	125.59	284.667
CIMBL157	7804.92	5.2346	93.5807	111.084	58.0413	38.1553	124.295	329.333
CML298	6062.48	5.32602	85.0008	112.799	59.0295	40.4217	115.571	227
CIMBL108	19483.3	11.588	151.464	192.972	69.1351	53.6786	199.34	344.333
CML226	8070.94	6.74434	92.9911	122.035	57.6397	40.09	126.255	268.5
CIMBL19	17723.7	10.4526	128.883	162.542	64.8178	48.4583	169.706	586.333
CIMBL147	12633.3	14.2396	93.9136	113.713	57.0049	37.0122	119.602	278.667
NAN21-3	9965.73	4.5353	132.133	166.328	66.6467	48.9473	166.543	446
CML28	15694.8	5.80522	128.541	157.163	61.1923	44.0367	162.86	504
CML225	10487.1	5.88706	81.91	101.606	55.7343	34.4943	111.666	265.667
CML189	11335.7	2.88013	116.207	159.568	62.2602	46.4504	167.158	376.333
CML451	11837.6	3.47572	106.427	134.67	61.2277	42.3292	139.408	402.667
CIMBL85	20569.2	8.65257	156.407	208.3	65.1629	52.9906	213.283	595.333
CIMBL58	10933.4	11.7721	92.5921	112.119	60.2448	37.4876	116.892	372
CML408	10831.4	7.06938	99.9778	125.91	65.6549	45.169	131.599	420
CIMBL13	12985.1	12.1583	100.499	122.597	62.5333	40.1114	125.137	346.667
CIMBL81	12081.3	5.94464	119.336	150.163	64.6401	46.7739	156.164	403.333
CIMBL44	10876.3	4.04349	125.475	187.093	62.1426	48.7749	192.084	408
CIMBL48	7652.4	4.64059	98.8695	123.092	61.1266	44.6093	127.151	277.333
CIMBL59	11088.2	10.2711	87.6337	103.68	54.5533	33.4594	109.073	254.667
CIMBL87	11128.6	7.60927	103.022	147.195	60.3462	44.3884	153.679	410.667
CIMBL22	13896.1	6.31846	129.848	169.896	66.0784	50.2064	176.85	479
CIMBL56	13988.2	3.46874	97.8261	141.597	60.0904	44.3299	146.405	464
CIMBL20	22132	8.06612	165.067	190.577	70.2702	53.7865	195.177	640.333
B11	12812.7	7.08335	108.714	141.639	64.5841	45.6295	148.162	452.667
CML432	9863.34	6.36873	93.0024	143.522	64.5857	51.1855	153.53	329.5
CIMBL66	9846.92	6.35616	109.09	132.736	62.7019	43.9887	136.806	362
CML113	8873.48	6.49258	87.3603	116.358	55.0236	36.7754	120.417	318
CML473	11189	11.4266	93.3696	116.503	58.1478	39.1936	126.294	394.667
CIMBL125	14832.8	7.34273	115.831	153.827	65.0483	45.052	156.895	464.333
CML286	11818	15.8817	111.796	132.864	63.2255	44.9868	135.462	348.5
CIMBL153	8960.44	5.38275	92.4449	118.735	58.3028	38.8346	122.774	388.333
CIMBL69	9036.23	4.17615	106.706	131.691	65.3279	43.8551	137.959	345
CIMBL75	11296.4	10.31	109.667	152.5	65.2785	48.6121	159.25	405
CIMBL110	15158.6	9.69119	126.366	155.852	64.9706	46.0423	162.546	500.667
CIMBL17	11327.7	6.53767	103.934	142.022	62.3656	44.6486	149.406	498
CML326	11533	10.3316	114.378	144.928	67.4278	52.6663	154.141	316
CML428	7425.2	6.38801	81.6988	104.381	65.8878	44.2939	108.608	142
CML287	12353.2	13.9091	102.119	137.754	60.2349	45.8132	137.203	280
CML325	6749.83	10.846	73.9226	113.774	58.0487	41.57	118.503	402.667
CML290	10372.4	5.10752	97.709	136.301	63.5418	46.3476	137.283	538
CIMBL140	12083	8.39448	104.721	131.394	60.3956	43.1594	134.727	460
812	9421.63	9.80341	79.1097	98.1631	61.1371	34.294	101.943	176.667
S22	16546.1	12.0096	132.859	158.167	64.821	47.2927	164.93	443.667
DAN360	19286.3	3.4306	174.404	209.237	68.1971	56.5139	212.646	842
177	8905.87	4.1195	91.74	111.217	61.9495	39.7541	116.94	348.667
8902	11052.1	8.50995	90.6452	131.025	56.825	39.7277	136.143	453.667
WMR	7301.09	3.05595	101.606	130.843	61.1383	42.9113	133.229	486
TY5	17561.2	6.31119	151.773	203.877	61.6197	50.6469	213.556	601.667
SY1077	9484.47	4.8804	140.262	200.504	66.6746	56.2403	204.994	386
CI7	11599.1	5.72234	143.097	212.496	63.3601	53.0529	215.322	604.333
CHUAN48-2	10203.9	15.784	87.543	118.371	57.1069	38.4958	124.497	475
M97	14046.8	12.3151	119.258	144.435	64.8159	44.5404	160.276	532
R15X1141	18154.4	8.81604	134.2	168.314	65.5279	49.2731	176.056	683
DH3732	12022.5	2.49933	150.449	189.938	69.3172	54.3859	194.301	566.667
RY737	11611.9	11.3574	97.8107	122.294	63.6148	41.1289	125.477	493.667
K22	11867.9	8.89748	115.712	138.987	64.1982	43.9594	146.02	432.333
YU374	11027.4	9.79491	112.516	146.557	66.3411	44.518	158.524	332
D863F	12740.6	4.65108	111.299	169.696	58.9401	45.7835	173.914	456
HUANGC	8748.83	4.88835	97.2067	125.029	62.2739	42.1726	128.496	316
HB	15104.7	18.7362	129.903	155.769	70.7023	48.5645	162.601	339.5
LIAO5263	11633.6	7.46132	108.546	154.878	64.4722	49.2483	163.168	374.333
LX9801	8724.64	12.5555	93.0348	105.6	62.3479	41.2334	111.74	182.5
ZZ01	11917.5	7.83213	113.843	159.988	64.2668	51.0406	164.452	558
ZHENG29	12002	4.43065	133.269	175.605	61.887	52.0541	179.541	573.333
GY462	7465.22	5.44568	95.7606	126.247	55.8015	37.3926	130.059	262
JY01	13044.1	7.28731	120.997	153.945	62.6249	46.4668	162.015	419.333
B113	8550.67	5.24966	119.218	163.926	64.7996	49.4567	175.493	402
SHEN135	9226.79	9.46014	94.8103	116.094	60.1498	38.1874	121.516	354.667
RY713	9662.21	9.24023	98.0164	122.673	62.4539	43.7466	130.341	276
5311	13614.3	12.8939	124.711	171.457	63.7926	50.4666	177.625	548.333
835A	10798.7	2.50271	115.605	150.302	59.2281	43.6475	150.104	441
Q1261	10389.3	5.27466	125.612	191.712	69.5811	49.8211	197.256	565.333
GY386	12273.8	10.6037	103.44	143.733	60.246	43.0026	147.28	306
M153	12561.3	18.8924	99.394	122.829	67.2006	43.1671	130.751	211.667
ZHENG58	10931.2	12.4846	106.673	131.948	64.6326	46.5063	137.834	431
TY3	8998.47	3.39447	120.502	144.716	64.5795	48.1594	156.276	406.667
TT16	8852.55	4.10211	106.385	145.447	62.7555	45.9325	148.964	368.5
ZZ03	9391.29	3.95215	104.476	135.517	60.8318	42.5861	142.541	376.333
DAN340	10029.7	4.52123	124.498	152.278	60.882	45.4679	160.467	393.333
TIE7922	9792.11	7.2963	107.709	151.219	64.4684	46.3689	160.667	432.333
ZB648	7062.57	4.66719	102.231	130.927	63.6202	46.3496	136.663	411.667
975-12	10403.1	7.24493	108.224	150.754	51.5897	39.5864	154.092	388.667
JI846	12622.6	5.00389	109.483	162.297	62.1927	46.0768	173.181	473
TY8	10155.8	9.70001	109.329	148.909	66.299	51.6508	156.459	484
LXN	14159.3	17.9021	116.218	145.618	62.5466	45.1752	154.286	379
238	12825.1	15.78	105.605	165.461	60.8396	48.4637	171.801	549
K14	13910.5	6.50778	145.984	185.399	66.1659	53.872	195.458	602.667
IRF314	10296.2	2.60789	154.695	195.205	67.4354	51.131	202.908	696.667
R08	16279.1	3.75806	159.717	200.733	71.2635	59.4152	206.229	622.667
BY807	12706.5	9.73917	110.757	139.45	61.9776	44.3237	145.858	507
SY1035	11964	2.8399	134.43	172.736	64.3999	48.7789	176.756	818
DE.EX	13632.5	11.7447	133.691	170.341	65.9725	51.4206	176.111	582.667
SI446	15192.2	7.23875	118.495	169.918	57.707	44.9496	178.559	919
05W002	11515.3	5.06408	105.411	144.219	59.8402	43.7238	147.982	521.333
18-599	10486	14.031	80.5319	97.8106	57.4495	35.0841	99.071	126.667
IRF291	12426.3	9.47887	129.923	156.564	66.4605	46.6547	168.733	476
ZH68	11380.4	11.9301	109.16	145.344	59.453	43.5137	149.212	538.333
BY4839	13753.4	14.1425	113.494	142.022	59.819	43.7864	147.121	377.667
DONG46	11280.6	2.9902	161.343	216.833	70.1335	59.3954	227.567	544.667
SI444	9116.6	7.18615	82.4313	107.892	57.2058	35.0952	111.643	300.333
C8605	11151.2	7.55985	86.8012	109.449	55.8598	35.9277	115.945	398
7884-4HT	12943	11.3415	119.02	164.604	65.9988	51.4865	178.271	552.333
TY4	16083.3	4.39187	156.641	190.389	66.9909	52.1218	200.8	649.667
TY10	15136.4	8.23323	139.277	190.385	65.6024	53.6524	191.559	553.667
501	12306.4	3.96605	131.519	167.338	66.9735	52.0916	177.3	491.667
MO113	9838.56	4.28879	133.564	169.17	68.2622	47.0342	174.579	385.667
LIAO5262	12546.1	2.4075	142.028	186.311	65.4006	51.2407	189.113	597.333
ZI330	13702.1	20.0975	112.097	137.332	65.7727	45.0562	148.526	371.667
05WN230	15268.4	10.4278	116.955	141.582	64.2593	45.6637	147.054	410.667
B114	13564.2	1.94132	165.05	195.368	70.1947	51.7589	200.118	622.333
9642	14981.7	14.7483	118.179	149.423	63.3164	47.3375	153.859	417
B77	11391.5	9.73883	114.187	135.404	65.5309	41.0531	148.791	420.333
7381	8886.27	5.67183	107.099	148.107	60.1883	43.5273	153.438	397.667
JH96C	16225.8	13.0435	128.117	181.33	65.4128	53.5744	185.867	595
XUN971	16867.5	5.39056	139.386	182.292	62.1171	50.3101	188.908	529.333
LIAO5114	10787.7	4.88181	102.732	132.348	62.506	40.6545	136.306	468.333
07KS4	13173	6.34371	126.877	166.204	64.0118	48.2636	178.022	541.667
BY4944	14128.2	10.3045	132.303	156.869	70.6201	49.7722	162.633	474
K10	12369.5	4.94245	121.922	139.204	66.3145	44.9681	155.139	611.667
ZHENG30	13165.7	5.23196	120.707	136.753	64.9738	44.075	142.4	288.333
9782	9736.68	9.25611	100.212	130.078	57.4381	39.6952	134.184	268
DAN3130	9884.88	6.01705	119.122	158.576	64.8837	45.6242	165.304	524.667
YE8001	13092.2	5.98776	113.031	134.501	60.9701	40.9619	139.13	376
LY	9608.23	4.53487	102.054	127.396	60.0301	40.9682	134.943	348.667
GY237	6449.51	2.86844	107.994	127.03	68.2079	46.2116	133.208	344
WH413	5624.23	4.15536	72.4157	94.3661	60.3184	37.8629	98.6653	367
SY999	14426.7	6.84976	118.347	153.114	67.0381	49.9287	161.223	511.333
NMJT	10714.7	5.45823	132.965	163.616	67.3215	52.106	172.722	557
YAN414	12129	4.45397	170.66	237.599	69.7806	55.0192	241.375	447.667
JIAO51	8614.52	5.42863	95.5455	124.962	57.3553	34.8561	122.302	254.667
A619	9150.96	9.92708	99.4475	125.252	59.9755	38.3972	136.837	386.667
B111	9255.22	12.6877	87.5862	108.937	60.5492	36.8346	112.5	329.667
HUA83-2	10593.6	3.38716	152.234	205.393	69.5183	56.7332	209.664	448.667
JH59	11492	4.85229	150.062	193.213	69.2075	55.9629	202.941	563.333
BY843	9836.67	7.73756	105.185	139.612	63.4113	42.6889	147.929	400.333
LIAO159	17115.3	5.94873	163.429	202.179	70.7419	53.4841	204.626	651.667
YE478	21173.5	13.2753	115.797	149.738	56.9188	41.5684	154.325	363.333
GY220	12981.3	11.7253	117.716	151.953	63.9164	46.8567	154.273	334.667
268	18379.1	4.06164	167.168	180.582	68.2697	50.3442	188.076	900.667
DSB	11615	5.21791	157.425	201.259	67.0896	53.5282	212.214	488
TY6	15631.1	7.09702	154.688	199.572	71.5567	54.2708	208.909	563.667
YE52106	10615.9	7.24422	117.441	145.701	62.4496	43.4757	156.828	501.667
LY042	13999.5	8.83535	110.381	142.331	55.7887	38.141	144.781	410.667
GY386B	12839.1	7.29629	112.787	144.644	61.0603	41.08	152.536	221.667
ZAC546	11030.4	7.90764	118.357	149.157	69.3593	45.8286	157.008	435
3411	13824.5	13.5582	101.61	151.224	56.9611	41.5866	155.043	374.667
GY1032	12183.2	4.19177	126.685	148.099	60.1314	43.085	154.527	468
B151	8639.93	6.43553	96.1195	118.454	60.5867	41.3971	129.602	349.5
XZ698	12637	7.90103	131.67	170.13	64.6005	44.375	180.918	433.333
4F1	19299	4.47916	174.783	222.214	67.7623	57.8528	229.648	854.333
LG001	12799.6	6.3069	117.423	164.726	61.963	47.6353	167.311	468.667
5213	16641.2	8.732	135.174	163.178	63.9947	48.3374	172.007	729.333
MO17	14418	5.90237	115.685	154.633	60.8819	46.0768	160.928	567
D047	15934.5	4.44724	143.14	200.744	66.3131	48.5406	207.335	431.333
ZHENG22	11331.3	4.46259	111.347	135.66	64.7292	44.4532	141.899	547.333
ZHI41	11959.6	10.7604	104.31	120.456	60.2258	39.7717	129.187	300.333
J4112	12332.1	11.9188	101.717	125.639	61.4764	38.7408	132.199	431
ZHONG69	19198.2	13.4087	140.845	165.324	66.2982	46.7201	174.668	446.333
SY1039	12699.5	6.7667	136.9	199.346	66.8143	51.5225	198.661	473
TIAN77	15559.4	4.51245	150.427	188.473	66.5554	52.56	200.084	797.5
CF3	19755.4	4.61296	177.353	208.233	68.4281	54.884	216.233	730.333
BZN	9318.7	3.88987	105.41	136.443	64.3073	45.789	145.076	493
1462	18578.2	13.6661	110.269	144.739	53.0404	37.9747	155.844	446.333
SY1032	13127.2	5.31006	144.221	168.705	64.5786	47.6999	181.223	569.333
SHEN5003	11239.6	3.73834	117.214	150.958	62.3655	44.8357	160.016	408.667
B73	12532.1	6.91607	98.1198	120.328	54.1026	34.1845	123.954	247.667
TY1	17243.2	9.46665	142.06	175.305	62.914	48.3781	188.582	454.333
M165	10026.5	8.08818	97.0104	126.779	61.8462	42.6609	139.185	410
SY1128	11999.8	4.63815	107.511	134.524	59.1979	40.33	143.388	459.667
JI63	10288.2	4.52921	133.711	164.6	65.8433	48.4419	173.797	574.667
BEM	18241	7.75301	145.082	175.104	65.3634	46.6237	180.828	598.667
RY729	5862.05	2.61851	77.8502	120.521	59.4766	44.9184	121.498	353
HYS	6759.65	9.07443	88.3409	115.955	63.675	42.7676	122.064	335
JI853	13771.4	16.4634	131.976	152.576	64.6806	45.0424	157.048	423.667
7327	21025.2	24.2748	121.78	164.563	58.4308	43.0678	170.648	391
4019	12010.1	3.84637	107.455	135.312	58.1691	41.2852	140.05	347.667
BS16	10124.9	4.78232	103.353	129.498	65.9509	44.7751	137.814	476.667
BY809	18944.3	7.7527	135.325	157.891	65.5794	45.5561	170.001	572.667
ZHENG28	10470.8	9.82928	99.7868	141.881	57.3758	40.7965	150.174	468.667
GY923	12555.9	6.72874	115.267	148.154	62.6583	44.0138	158.846	362
GY1007	11423	8.95166	88.2204	109.901	53.0605	33.2191	121.112	271
FCD0602	14607.1	3.55004	132.036	168.362	59.93	45.6344	178.222	527.333
LV28	10191.7	4.5542	113.277	138.89	62.8731	44.158	141.876	495.667
ZHENG32	19799.1	2.35971	143.711	188.23	64.4754	48.3567	194.136	855.667
TX5	14497.8	3.82677	150.042	201.093	66.9799	55.3692	206.94	545
81162	7984.37	6.9695	84.4206	98.8543	54.3119	33.3896	104.128	253.333
04K5702	9419.94	4.18817	107.305	162.414	65.5748	51.3898	165.824	393.667
SW92E114	12919.9	8.70018	121.077	153.796	62.7266	47.0486	158.413	300
BY813	14963.5	9.14713	115.063	148.675	61.061	43.6972	153.771	427
YE515	14086.7	6.00825	92.8379	113.974	55.6296	33.6945	121.467	468.667
150	12108.8	7.98979	95.3275	124.757	58.1398	37.2122	127.958	306.333
BY804	20270.9	3.50148	142.139	182.363	65.3377	49.0184	192.226	709.667
ZHENG35	13109.5	3.45655	148.152	179.049	67.5496	49.7547	188.787	432.333
Z2018F	14044.3	20.0738	92.8749	121.881	55.9094	36.3458	128.888	254.667
SY3073	15718.1	13.3712	111.087	134.185	58.1279	38.901	139.786	384
YU87-1	12971.6	6.0865	111.604	167.308	57.1764	44.1034	170.412	509
U8112	12299	8.3292	109.038	137.064	61.5403	41.0333	146.932	398.667
EN25	14899.8	13.7417	114.506	163.019	59.2345	44.3721	171.83	435
LK11	13898.8	3.87641	139.911	190.313	64.3334	50.7601	199.857	683
RY697	14543.2	2.28646	122.553	156.423	59.3224	39.7078	161.176	612.667
YE107	17478.3	3.45493	170.688	218.619	67.0941	53.0281	225.804	744.667
DONG237	11300.3	6.93986	132.896	145.22	68.4672	49.0487	154.977	480.5
3H-2	14582.4	6.08543	149.052	185.441	64.3004	50.0345	190.466	488.667
WU109	8136.41	7.47932	91.2838	110.056	63.9313	35.2826	119.304	221.333
ZONG31	8530.37	8.43001	95.5036	131.771	61.6417	43.8945	133.851	320
L3180	20403.3	2.284	190.561	242.756	70.1955	53.9943	244.64	1044
DAN598	7481.32	8.09308	101.691	166.226	50.9487	47.2353	167.436	388
GEMS1	9736.12	4.6197	102.589	120.68	62.8785	41.0288	124.245	539
GEMS2	12443.7	11.9871	92.9954	122.585	51.2292	34.6906	125.237	462.333
GEMS3	10330.5	6.39436	105.485	137.824	58.3269	42.868	148.052	515.333
GEMS4	10836.1	7.72896	89.8427	109.029	57.9806	34.9698	114.384	250
GEMS5	7754.45	1.47871	142.181	180.609	69.856	56.0708	194.547	708
GEMS6	9149.97	3.71431	109.729	136.842	61.6448	44.0528	141.229	333.667
GEMS9	11078.5	8.99081	92.8157	119.232	55.1391	34.5747	120.34	402.333
GEMS10	9233.09	7.92152	85.9028	106.418	54.2221	33.5066	112.966	355.333
GEMS11	11965.8	5.89626	102.059	125.545	55.849	36.7214	128.3	398
GEMS12	13524.5	8.47181	119.988	161.021	64.4808	45.3517	164.976	395.333
GEMS13	14635.2	5.40323	119.746	153.671	60.6551	41.5482	159.093	623.667
GEMS14	13940.7	14.0657	114.196	139.165	62.7665	44.9832	145.207	434.333
GEMS15	14189.2	10.4244	104.827	150.015	54.3734	38.2799	157.326	424
GEMS16	9638.37	6.15179	133.105	154.198	66.6415	50.1114	165.552	483.667
GEMS17	9111.9	5.24191	121.629	169.214	58.6754	40.7464	171.924	380
GEMS18	10921.2	9.64416	95.9578	123.242	58.1618	38.3451	129.79	445
GEMS19	16131.2	16.0269	106.559	133.649	56.639	38.6747	141.247	497.667
GEMS20	17096.2	3.60136	149.663	175.539	67.3695	50.6909	181.354	976.667
GEMS21	10434	3.56539	116.728	144.28	55.0316	40.3835	150.606	565.333
GEMS23	13665.2	3.93074	119.742	142.861	64.3867	44.5838	149.473	570.667
GEMS24	12785.9	2.95538	111.103	128.612	60.7841	39.7252	132.279	567.333
GEMS25	11112.4	7.93876	115.469	147.492	64.2999	46.5951	153.846	584
GEMS27	17315.7	19.8489	128.707	147.771	66.6322	48.658	152.007	358.667
GEMS28	12052	6.78835	113.355	135.743	59.6889	40.3641	138.167	469.333
GEMS29	9956.44	8.6366	103.726	131.188	59.669	40.1524	139.01	472.667
GEMS30	12237.8	1.77697	149.018	185.738	69.7624	54.9614	196.714	833.667
GEMS31	10027.9	10.5844	102.619	120.442	59.3448	36.9792	123.056	306
GEMS32	9452.06	5.31708	89.1153	117.691	55.8914	36.6181	126.734	240.667
GEMS33	14204.4	15.3002	122.311	150.522	61.0005	42.7858	157.407	414.333
GEMS36	20194.6	4.08218	170.837	220.4	65.2603	50.9818	225.742	970
GEMS37	12159.2	6.22202	137.285	213.833	63.3125	45.2449	214.777	502.667
GEMS39	18864.3	3.74848	146.531	178.08	67.1485	52.0486	192.319	758.667
GEMS40	16530.6	4.66281	161	219.262	64.1516	50.9726	221.862	843.333
GEMS41	9787.95	6.39581	98.8266	119.356	62.5945	39.6529	131.343	410
GEMS42	13536.2	9.02698	120.807	169.378	62.0766	48.6183	174.467	402
GEMS43	10168.9	3.62734	100.574	120.615	54.5962	39.1864	124.144	497
GEMS44	9949.1	2.72626	130.689	157.883	66.649	48.5645	171.746	431.5
GEMS45	6833.78	4.1875	85.6358	100.122	60.299	36.0347	104.159	198.667
GEMS46	11179	8.26343	124.555	175.505	60.7222	46.4765	179.72	370
GEMS47	6193.9	3.13152	81.0911	114.894	56.2586	40.2183	115.088	246
GEMS48	12973.3	2.38256	134.786	169.548	62.7134	44.8226	175.134	500.333
GEMS49	10268.2	3.40291	103.041	123.784	62.6481	41.8736	135.276	396
GEMS50	13135.1	9.00262	107.856	135.288	59.6934	41.0529	139.981	418
GEMS51	10504.5	12.1485	93.9157	114.032	57.2397	38.0387	118.986	433.667
GEMS52	12396.7	5.75374	130.261	170.659	63.1511	47.5806	177.662	435.667
GEMS53	7889.49	10.5975	73.0665	91.0222	58.4345	33.696	93.342	251.333
GEMS54	5442.36	6.03797	71.8907	93.7224	53.7019	32.4252	97.4392	233.667
GEMS55	4828.88	4.48914	89.3369	114.974	54.7228	35.5547	102.265	257.333
GEMS56	7506.75	1.54444	119.357	147.734	67.189	45.1175	155.229	464.667
GEMS57	8174.53	3.11567	99.6973	124.385	61.1163	38.7596	126.254	385.333
GEMS58	7703.94	5.0109	106.827	161.798	59.7094	44.7583	173.474	350
GEMS59	15092.4	3.49567	123.138	167.123	59.4353	43.7026	171.182	652.667
GEMS60	12370.5	5.80151	95.0666	123.127	56.1023	39.5651	126.794	262.667
GEMS61	13393.8	4.44969	126.377	149.975	60.1878	41.3973	152.736	361.333
GEMS62	11446.3	3.409	127.894	152.091	64.3988	45.1298	164.701	498.333
GEMS63	12048.6	3.7745	107.111	128.517	60.1673	37.8669	131.217	440
GEMS64	14419.8	8.10105	121.03	147.74	59.6856	39.6352	153.734	259.333
GEMS65	12354	10.1256	99.7988	134.386	59.4065	41.5708	138.305	237
GEMS66	11168.5	4.46507	107.004	126.904	60.3888	39.4488	131.731	181

## Sheet: Table S3
Table S3. Description of eight aboveground traits.
Aboveground traits	Abbreviations	Definition	Units
Plant height	PH	The average height of selected individuals from ground to the tassel tip with six plants scored randomly in each plot.	cm
Ear height	EH	The average height of selected individuals from ground to the insertion of the top (uppermost) ear with six plants scored randomly in each plot.	cm
Ear leaf width	ELW	Width of the ear leaf measured at the widest portion of ear leaf lamina	cm
Ear leaf length	ELL	Length of the ear leaf measured from leaf base to leaf tip	cm
Ear length	EL	The length of uppermost ear from the base to the tip	cm
Ear diameter	ED	The diameter of uppermost ear measured in the middle of ear	cm
100 grain weight	HKW	Average weight of three samples of 100 kernels randomly selected from the shelled lot of grains in each plot	g
Days to silking	SD	Number of days from sowing to when 50% of the plants silk	day
Note: Phenotype data on aboveground traits are derived from published literature (Yang et al., 2014)
Reference
Yang N, Lu Y, Yang X, Huang J, Zhou Y, Ali F, et al. (2014) Genome wide association studies using a new nonparametric model reveal the genetic architecture of 17 agronomic traits in an enlarged maize association panel. PLoS Genet 10(9): e1004573. https://doi.org/10.1371/journal.pgen.1004573

## Sheet: Table S4
Table S4. The phenotypic data of aboveground traits used in this study.
Lines	PH (cm)	EH (cm)	ELW (cm)	ELL (cm)	EL (cm)	ED (cm)	HKW (g)	SD (days)
150	199.407	84.0924	8.41555	62.576	13.1655	3.81446	18.6644	69.5634
177	167.738	62.3267	8.33679	75.8469	13.2418	3.66473	22.1752	69.1351
238	195.178	65.9003	9.38908	78.9746	13.8455	3.7085	21.9434	74.5957
268	160.796	52.6939	8.84489	70.4296	10.7383	3.66728	18.8663	71.2765
501	170.018	62.2548	8.79621	67.8307	10.3314	4.08638	25.8311	71.2765
647	143.483	68.9695	6.51881	65.5521	6.87504	2.55771	11.7899	72.2401
812	164.782	57.3005	8.43524	71.9707	11.7343	3.67823	22.9926	68.7068
1323	183.039	70.5583	10.5376	70.9926	12.4923	4.13654	22.2563	75.4523
1462	211.175	88.146	9.69973	84.8912	17.1356	4.34043	25.7713	70.9553
3411	164.577	61.6852	8.99529	77.9487	13.245	4.06415	23.3708	74.5957
4019	185.08	61.4748	8.48118	67.3462	13.4174	4.06869	21.129	65.9229
5213	182.328	50.135	8.33023	69.5618	11.8237	4.01982	24.7318	67.4219
5237	136.779	46.8874	8.73058	63.0196	11.4204	4.22007	19.3385	64.7452
5311	159.203	67.0861	8.29605	79.6756	11.3326	3.97604	25.4822	73.7868
7327	170.128	73.2965	9.43502	74.689	12.7223	3.75464	23.4099	73.525
7381	164.402	67.2838	9.18096	70.8066	11.7278	3.89853	21.4476	68.2785
8902	148.308	43.6987	8.514	64.7029	12.1757	3.47141	26.2085	69.2422
9642	161.421	66.9779	9.56082	80.0556	11.3178	3.96875	23.8697	75.9876
9782	141.273	45.7429	9.06092	59.5506	8.33189	3.99465	20.3664	69.9916
81162	113.66	37.0577	8.44837	57.4692	12.0706	3.4322	24.0798	70.8482
526018	174.651	52.7843	8.75683	70.8333	12.1704	3.98808	23.8772	72.026
04K5672	145.857	60.4552	6.85371	68.2231	10.4793	3.49239	19.8753	67.529
04K5686	152.548	46.9958	6.67304	64.4413	10.8234	3.38934	19.0227	64.2098
04K5702	160.701	53.9258	7.40702	71.3452	13.0141	3.92279	23.063	59.7128
05W002	170.997	64.8619	8.63156	69.3922	13.688	3.84778	26.1191	67.2078
05WN230	202.615	78.0008	8.66932	75.7127	11.5141	4.04644	27.3696	71.5977
07KS4	190.099	76.4976	8.44837	71.9935	11.9838	4.07036	23.8482	75.3452
18-599	184.219	82.4547	8.50087	83.3558	11.9811	4.50092	24.7468	73.6321
303WX	126.028	49.5652	7.23364	61.1685	9.83721	3.87319	19.3939	63.8886
384-2	213.158	86.6026	10.5923	74.2568	13.872	4.16626	23.4074	72.5614
3H-2	121.266	40.6095	7.82461	65.8805	10.7022	2.73924	18.7657	73.2497
4F1	169.54	54.9679	8.48556	66.6706	13.8349	3.61166	24.969	69.2422
7884-4HT	138.663	37.257	7.2145	74.3023	11.5725	3.48655	21.0037	69.7775
835A	176.069	60.8242	8.56431	67.2438	12.3832	4.26931	21.8885	67.4219
835B	161.385	67.9368	9.13531	64.4982	11.9164	3.86516	18.795	68.4927
975-12	164.563	65.4304	8.69995	72.5849	12.5856	4.25247	24.0459	68.3856
A619	162.899	44.8295	7.67319	62.6215	10.8517	3.99483	23.3678	67.1007
B11	158.45	68.705	7.91422	78.2771	13.8331	3.61275	21.3455	77.9149
B110	197.701	68.9562	8.45055	75.2532	12.0943	3.64412	22.9353	73.9533
B111	183.196	64.4446	7.70455	67.6533	11.0284	3.31512	22.5155	68.7068
B113	175.4	59.1278	9.12218	75.4283	12.671	3.34904	17.8714	71.8119
B114	178.869	55.0712	8.31054	68.8589	11.5353	3.46868	26.7616	70.2058
B151	141.176	71.2129	8.68026	62.4509	13.3884	3.76923	21.262	73.0967
B73	173.319	66.592	8.0502	67.353	11.2158	3.61369	19.1801	73.8462
B77	191.824	74.7046	8.06585	73.5034	12.6254	3.27628	17.8125	73.5199
BEM	154.463	54.3224	8.1574	66.2725	11.4274	3.75592	24.3945	71.2765
BGY	142.986	57.1478	6.73977	66.9663	10.0477	3.57774	21.0296	64.3169
BS16	175.994	69.9199	7.72424	72.3802	10.5996	3.70102	23.6118	71.5977
BY4839	189.836	73.186	8.49212	67.6373	11.3445	3.69136	19.3324	68.7068
BY4944	206.525	79.8781	9.15718	74.3478	17.3507	3.97925	24.5946	70.7893
BY4960	175.99	61.1026	9.14187	70.7878	13.1045	3.32387	18.7266	73.0967
BY804	200.635	64.4829	9.01279	67.6715	13.5129	3.58503	22.5143	75.4217
BY807	163.459	64.6128	10.4129	62.6329	13.4661	3.62096	22.1386	73.7391
BY809	167.847	63.4766	9.65702	64.5553	13.1157	3.31034	20.1955	73.1055
BY813	180.129	77.5911	10.0528	60.8452	12.5532	3.85523	22.5786	74.4886
BY815	165.639	73.0054	10.0435	59.0343	12.7753	3.80747	20.6722	74.3318
BY843	147.746	55.281	9.5058	65.1442	11.195	3.77949	-999	75.9411
BY855	202.603	84.8884	8.87278	63.6565	14.1497	3.60072	20.9924	72.5614
BZN	136.936	17.6313	7.7359	56.4683	9.60549	3.11669	16.9228	60.5787
C8605	144.344	52.3841	8.01042	59.579	11.1844	3.48762	22.8169	72.833
CA47	169.891	58.8743	7.62798	67.2392	10.3714	3.70412	20.7782	73.2038
CF3	187.466	80.2428	9.26219	67.8762	11.0195	4.2828	24.9307	71.1694
CHANG3	165.09	34.9683	7.86425	62.4964	10.9109	3.36673	20.0706	64.9593
CHANG7-2	128.744	50.7339	8.19131	60.3354	9.41445	3.76686	19.6466	68.0644
CHENG698	172.819	64.0099	9.20969	73.5062	11.4246	3.84072	19.8756	75.4523
CHUAN48-2	178.654	62.5944	8.98873	63.0992	12.3579	3.87446	23.624	73.0967
CI7	193.947	71.0852	7.80879	73.1681	10.4366	3.86211	20.3703	72.6968
CIMBL1	184.709	64.4257	9.17906	68.3539	11.3905	3.64175	22.7273	68.3856
CIMBL10	180.261	61.0901	8.0502	90.8738	13.1758	3.68498	22.8932	74.3816
CIMBL100	167.843	62.4119	10.6033	77.123	13.0654	3.76668	25.386	75.2934
CIMBL101	182.973	81.763	9.27313	82.066	13.168	3.83671	24.2511	74.2745
CIMBL102	158.298	60.325	8.93841	72.0276	12.5011	3.71999	22.9011	71.7048
CIMBL103	110.17	38.3119	8.76121	58.7272	10.1715	4.03393	22.0918	73.0138
CIMBL105	179.466	72.7926	8.89247	77.3459	13.8853	3.84582	22.4226	75.1311
CIMBL106	208.136	68.8936	8.31492	85.2848	14.01	3.8234	22.9499	73.3109
CIMBL107	199.081	63.2773	8.10708	91.8338	14.0875	3.84492	28.3817	76.2018
CIMBL108	184.726	55.0693	8.13083	85.55	12.2532	3.81448	22.194	78.7503
CIMBL109	189.641	66.4905	7.64077	81.0448	12.4419	3.59782	25.4742	74.3763
CIMBL11	191.768	84.3265	9.51159	70.4557	10.6217	3.93045	22.3429	77.2725
CIMBL110	192.867	57.4794	8.46204	89.791	14.7884	3.32419	24.5946	76.9513
CIMBL111	137.381	48.5398	9.25344	65.1965	11.6638	3.50326	24.5171	75.024
CIMBL112	170.549	58.9346	7.42671	66.2975	13.122	3.14277	24.3957	68.5997
CIMBL113	189.506	68.2992	8.96466	78.5447	12.162	3.63701	22.4708	73.6321
CIMBL114	173.786	71.0127	8.26241	77.305	12.0501	3.69884	25.5694	75.3452
CIMBL115	194.778	88.8445	10.041	73.6313	12.5156	3.90893	24.0047	75.6664
CIMBL116	179.048	71.4923	7.94957	72.2437	12.9681	3.26806	23.7514	75.2381
CIMBL117	154.459	80.2243	8.40899	75.9288	12.2765	3.62917	20.7576	73.7391
CIMBL118	197.869	87.0547	9.43739	75.0302	12.8394	3.88194	21.0568	82.4119
CIMBL119	220.463	95.8396	7.25607	86.7907	12.0669	3.63464	18.5272	75.6664
CIMBL12	187.458	81.3171	10.5683	77.0889	11.0047	3.6775	20.2078	76.0947
CIMBL120	161.812	55.9375	7.90582	74.2	13.1096	3.68206	24.9214	73.9533
CIMBL121	201.428	78.3324	8.36961	79.4546	13.4348	3.50989	21.7986	74.2745
CIMBL122	195.722	80.5788	8.24929	64.248	12.4109	3.49056	22.2667	70.527
CIMBL123	178.727	61.0546	8.67589	74.2682	9.48874	3.1652	17.8836	69.7775
CIMBL124	194.012	85.6252	8.89247	70.8788	11.7763	3.47634	21.3358	73.3109
CIMBL125	197.843	76.3111	8.90122	83.5287	13.6545	3.6485	19.9974	71.2765
CIMBL126	192.76	79.2111	8.25366	65.1738	11.8548	3.64777	21.8244	72.2401
CIMBL127	162.715	64.1849	9.27532	59.9578	14.8732	3.47634	20.4939	74.7028
CIMBL128	209.359	77.6494	8.56869	87.7005	13.7907	3.51755	24.6428	78.7715
CIMBL129	165.429	65.787	8.52494	69.166	12.8562	3.56552	20.5677	72.1331
CIMBL13	175.185	67.0303	10.0323	83.9017	11.6618	4.21952	27.3818	78.5573
CIMBL133	161.746	68.1557	7.96051	64.1115	11.4149	3.39883	20.6342	72.6684
CIMBL134	167.907	59.4898	7.93426	68.2515	10.8242	3.44679	23.6301	69.9916
CIMBL136	186.334	71.6715	7.87738	76.0539	13.7399	3.45518	24.3341	72.4543
CIMBL137	129.968	45.147	7.75461	65.5566	10.5563	3.41232	20.7375	76.3834
CIMBL138	139.769	47.4401	7.47177	75.4798	12.2151	3.65572	20.8101	75.9876
CIMBL139	158.405	69.7646	8.12896	68.206	12.1758	4.14017	24.6836	73.7391
CIMBL14	163.328	58.1074	8.69776	72.9716	11.3231	3.67823	22.5103	74.0604
CIMBL140	146.791	49.5394	7.93207	70.7765	13.0123	3.81629	27.6563	74.8099
CIMBL141	176.796	51.7093	8.23397	68.6837	13.2214	3.56073	18.5119	75.024
CIMBL142	169.969	59.1223	8.74808	70.5263	12.1368	3.89226	24.459	73.2038
CIMBL143	145.64	62.043	8.82684	62.4668	11.368	3.48947	21.6122	72.4543
CIMBL144	170.149	60.6099	8.44107	81.0424	14.0126	3.67043	20.4339	75.7735
CIMBL145	161.216	56.1855	8.16469	74.2523	13.0425	3.71175	20.3663	70.9553
CIMBL146	160.61	45.7313	7.6958	73.8929	10.3281	3.34193	19.4463	68.9209
CIMBL147	160.502	59.6526	9.51597	76.6339	12.5691	4.14784	24.3646	71.3836
CIMBL148	150.555	59.7268	9.36501	69.1614	14.1957	3.62041	25.0118	72.1331
CIMBL149	160.013	58.5545	9.97976	69.274	12.931	3.89817	23.6423	71.8119
CIMBL15	179.983	75.1104	8.83121	79.6821	11.1886	3.70795	22.2697	76.523
CIMBL150	164.569	64.1877	9.45034	73.9702	11.1568	3.83525	22.2941	72.7755
CIMBL151	160.665	60.1056	9.12437	71.1746	12.1421	3.7499	20.3473	73.9533
CIMBL152	136.881	48.5468	7.89269	70.367	10.7314	3.66619	17.145	69.4563
CIMBL153	155.673	58.6278	7.89706	65.5696	10.2959	3.63136	23.6586	70.3129
CIMBL154	178.559	67.3077	8.88372	80.4782	12.8284	3.28867	22.6235	70.7411
CIMBL155	163.88	60.5658	10.5573	64.7985	12.242	3.54309	24.0437	71.3836
CIMBL156	164.546	54.9576	9.05874	70.0372	12.556	3.44041	23.3447	74.2745
CIMBL157	186.823	73.1535	6.63913	70.9971	11.4089	3.2097	21.2474	74.4886
CIMBL16	171.725	54.4081	8.55119	75.2873	12.2279	4.19873	26.4662	72.2401
CIMBL17	167.315	43.9185	7.49015	81.5587	12.1031	3.55658	21.0887	68.9209
CIMBL18	181.156	71.3296	10.5398	78.3741	13.8579	3.60473	23.5069	77.5937
CIMBL19	197.133	77.5541	7.80518	81.4564	10.6093	3.70194	21.7284	78.7715
CIMBL2	172.115	63.7722	9.72161	84.3681	12.0978	4.29758	24.8654	72.9896
CIMBL20	201.465	78.4232	8.27918	86.8627	11.4833	3.56242	21.1223	82.6874
CIMBL21	158.032	62.6133	8.05896	77.5029	11.939	3.78966	23.6417	73.525
CIMBL22	193.662	80.106	7.72424	85.2438	13.9304	3.41032	21.337	77.2725
CIMBL23	197.436	80.8454	9.10468	75.9913	13.3272	3.51281	20.4183	76.8442
CIMBL24	145.374	44.7328	8.72256	76.9653	16.0234	2.92469	22.4751	74.3816
CIMBL25	186.064	67.6509	9.46127	80.137	12.6705	3.36709	22.5308	79.4139
CIMBL26	203.728	78.068	9.48534	75.3055	13.7341	3.51974	25.2687	71.2765
CIMBL27	162.498	63.8847	11.369	72.2687	14.4494	3.64825	26.8298	76.7371
CIMBL28	167.641	63.7593	9.85944	66.0223	12.0601	3.64825	24.9174	73.8462
CIMBL29	190.413	75.6691	7.88394	85.7215	14.8025	3.48947	21.9586	78.6644
CIMBL3	152.836	53.205	9.155	69.7642	10.7122	3.60619	23.7308	74.4886
CIMBL30	188.719	67.844	8.93622	75.0621	12.9328	3.71853	20.9795	72.8826
CIMBL31	207.142	97.084	8.18147	78.3013	11.2152	3.38023	20.5098	78.5573
CIMBL32	177.3	78.7992	9.36064	62.253	11.324	3.42235	21.8732	74.3816
CIMBL33	210.034	97.2817	10.2401	79.284	13.0454	3.48692	21.5761	76.3089
CIMBL34	210.444	82.2322	7.89706	74.6663	12.1757	3.60801	23.6362	76.8442
CIMBL38	169.146	70.9316	8.27718	72.8863	13.482	3.92863	22.6192	73.9533
CIMBL39	191.589	91.3325	8.8881	71.3793	12.1215	3.81884	19.4076	79.521
CIMBL4	177.043	56.9413	9.44158	66.9026	12.4199	3.70303	24.0388	72.7755
CIMBL40	171.708	61.7269	7.80518	75.7104	11.1205	3.44442	20.644	72.2401
CIMBL42	176.827	62.7185	7.96051	73.5403	12.6913	3.8234	28.7422	70.9553
CIMBL43	150.416	52.1026	9.03905	69.1273	11.2788	3.76376	22.4497	72.4543
CIMBL44	192.086	64.6653	7.15325	75.0644	11.3084	3.23268	20.7149	69.9916
CIMBL45	180.194	58.6409	8.35758	67.444	11.726	3.92571	20.8504	69.4563
CIMBL46	164.145	65.4103	7.68705	75.053	11.0878	3.86407	25.1229	69.3492
CIMBL47	162.184	62.3004	8.43743	67.6715	11.4725	3.40211	21.4065	66.7795
CIMBL48	168.449	57.5791	6.89728	72.5053	11.8935	3.68516	24.611	69.4563
CIMBL49	171.007	63.2889	8.23616	76.7704	10.4496	3.7375	20.708	71.2765
CIMBL5	157.752	50.5716	7.09637	85.8011	9.13496	3.53324	19.2817	74.5957
CIMBL50	153.478	49.6835	6.38062	74.0221	13.2413	3.09539	19.4806	68.7456
CIMBL51	189.579	71.7889	8.6937	72.8001	12.2622	3.44933	21.3871	77.0583
CIMBL52	165.385	57.4678	9.04342	73.1922	13.1795	3.5936	20.9978	72.7755
CIMBL53	171.715	77.0718	9.18125	70.367	13.0566	3.79932	23.754	78.8786
CIMBL54	198.014	72.4606	8.46368	77.6462	14.6627	3.94431	26.4546	66.8866
CIMBL55	161.817	52.5511	8.34773	73.3128	12.2871	3.57373	23.0388	70.0987
CIMBL56	193.396	86.602	8.95154	70.5899	12.5583	3.46138	23.1938	69.5634
CIMBL57	175.673	67.5828	8.39586	79.375	12.3906	3.57081	21.6597	70.8482
CIMBL58	152.056	55.0163	7.86862	75.3078	12.3826	3.39208	21.7237	71.7048
CIMBL59	185.194	53.3037	7.52297	78.5675	11.9457	3.75136	27.0859	66.1371
CIMBL6	166.235	48.005	7.7483	69.0135	10.5642	3.62333	23.1841	70.9553
CIMBL60	175.602	69.2535	8.50087	70.7992	11.1073	3.81191	27.1836	69.5634
CIMBL61	177.126	67.6121	8.74808	69.7301	12.6462	3.6226	23.3056	70.527
CIMBL62	166.128	54.9783	9.24469	72.4712	9.63379	3.06453	22.9926	72.026
CIMBL63	178.777	66.8658	9.27094	70.2715	12.8928	3.70303	20.7855	74.3816
CIMBL65	196.205	95.3171	9.89225	69.15	11.7296	3.90966	19.9473	78.6644
CIMBL66	131.246	41.5226	8.87278	70.9698	11.7202	3.07967	20.1072	68.2785
CIMBL67	173.26	68.5226	8.40024	77.6462	12.1314	3.51208	20.9612	74.9169
CIMBL68	175.916	67.7301	8.6912	76.0561	10.7708	3.35633	21.2794	77.4866
CIMBL69	135.174	44.5836	8.80059	71.8115	12.2385	3.13128	21.9861	68.9209
CIMBL7	203.934	95.1689	10.1176	76.3155	13.0141	4.07435	25.1448	80.0563
CIMBL70	180.41	91.409	9.18125	68.6268	11.3301	3.60619	21.5011	77.5937
CIMBL71	190.903	73.4735	8.1049	80.6602	13.7517	3.79075	23.8985	74.0604
CIMBL72	194.172	78.3925	8.41555	76.1335	13.3962	3.30527	22.6144	76.7371
CIMBL73	210.193	70.4199	7.60829	80.2621	11.7193	3.73713	22.3033	68.8139
CIMBL74	161.259	57.8132	9.55097	62.8831	13.3237	3.37567	20.5098	73.7391
CIMBL75	171.303	55.8741	9.25782	61.905	12.4463	3.93592	27.3568	71.8119
CIMBL76	143.139	54.8741	7.0723	66.0632	9.90089	3.58066	23.3032	67.3149
CIMBL77	195.3	69.0658	9.29938	86.6997	12.8098	3.47579	24.3945	73.9533
CIMBL78	144.034	61.4356	9.6516	64.9804	10.543	3.10575	22.0813	71.8119
CIMBL79	145.042	48.699	8.50306	67.2825	11.7373	3.59543	21.8506	71.0624
CIMBL8	181.842	70.884	8.2471	69.332	10.8225	4.04571	25.1979	73.0967
CIMBL80	182.436	70.7268	8.01739	77.5666	11.651	3.76157	26.4167	77.9149
CIMBL81	157.461	57.1532	7.54047	67.5008	11.5495	3.78054	22.0837	72.026
CIMBL82	192.148	83.4347	8.76777	70.9334	12.7408	3.65032	22.1935	74.8099
CIMBL83	107.198	28.8147	8.8334	72.9261	11.9815	3.83315	22.8395	68.7068
CIMBL84	165.254	52.5795	7.10949	73.9725	12.0224	3.57213	22.2424	68.2785
CIMBL85	147.734	60.0726	8.05802	71.796	9.85771	3.24387	21.6254	71.3343
CIMBL86	186.929	76.0312	9.24257	68.7366	12.8842	3.2266	20.9105	72.026
CIMBL87	175.553	55.1353	7.77966	70.7803	12.4711	3.01456	24.4851	69.8846
CIMBL88	157.625	59.7639	8.72183	75.8378	10.3513	3.95456	21.3871	72.5614
CIMBL89	147.861	51.2172	7.65861	70.7992	12.3493	3.36341	21.1137	69.6704
CIMBL9	150.155	57.1124	8.08521	78.3309	11.6711	3.50515	19.5459	76.4159
CIMBL90	144.945	56.6733	7.81284	79.9892	10.9923	2.77528	18.0806	74.0604
CIMBL91	183.719	71.1688	7.77674	77.8577	12.2102	3.79823	22.1386	72.026
CIMBL92	148.145	48.979	7.28451	73.3924	11.9811	3.48637	21.4279	69.7775
CIMBL93	160.365	63.3461	6.86884	71.7319	9.49582	3.33737	21.3638	71.4906
CIMBL94	151.641	50.5701	7.29982	76.452	9.79299	3.48035	21.7726	69.9916
CIMBL95	178.097	63.8515	8.89028	80.3418	13.3024	3.37895	21.2235	69.028
CIMBL96	168.889	65.6406	9.91194	69.1955	12.6542	3.80261	25.2589	69.9916
CIMBL97	154.473	60.2082	9.91745	71.2018	12.389	3.50333	21.6005	72.2401
CIMBL98	167.105	59.4446	9.41899	66.7957	11.7529	3.66072	23.2897	70.2058
CIMBL99	152.696	63.2765	9.97976	59.4323	12.0748	3.98407	24.4231	77.0583
CML113	162.343	53.4945	7.99551	72.2892	11.4982	3.77434	24.156	72.3472
CML114	195.505	75.5733	7.70017	79.9892	12.0457	3.55768	27.5618	71.4906
CML115	188.637	76.1614	7.94082	78.5106	11.9086	3.62041	25.3809	71.2765
CML116	183.487	68.6617	8.13771	72.3233	10.8663	3.93228	25.692	70.527
CML118	158.928	55.878	8.85966	74.2227	12.6175	3.19548	22.0739	73.525
CML121	187.56	77.0246	8.59932	62.0597	11.3876	3.03371	20.4244	72.5614
CML122	173.318	63.9625	7.94301	68.5359	13.1848	2.51595	17.3681	73.9533
CML130	149.944	56.9378	7.43546	74.1203	10.4531	3.62005	20.0193	68.8139
CML134	166.17	76.423	8.41336	78.6243	11.8911	3.83325	25.0606	72.6684
CML139	180.113	66.9645	8.44618	71.7432	13.5536	2.6334	17.6975	72.9896
CML162	197.883	92.974	9.64942	73.3401	12.1633	3.57993	19.804	72.7755
CML163	204.625	97.5848	8.80059	79.4205	12.02	3.7623	22.1142	79.521
CML165	173.044	71.7523	7.82268	88.872	11.1373	3.44059	17.5839	78.8786
CML166	213.134	101.055	8.9231	78.7949	12.6745	3.89325	22.2642	78.7715
CML168	199.612	82.5544	7.47921	81.627	12.6402	3.51865	24.5372	74.8099
CML169	197.65	82.1261	8.60369	88.7811	11.997	3.55294	23.4453	78.2361
CML170	167.178	69.8372	8.82246	82.0364	13.2317	3.56534	20.0523	73.9533
CML171	218.928	84.5553	8.87278	79.3591	12.5884	3.83088	22.0324	77.0583
CML172	202.314	76.1328	9.01061	77.1571	12.5056	3.78364	23.1439	77.8078
CML189	168	63.9365	7.83143	72.7555	10.1521	3.49567	19.2122	70.4199
CML191	154.644	46.4361	8.05458	65.7664	8.96338	3.64741	19.0132	71.3836
CML192	149.26	60.859	9.05655	76.759	9.87966	3.83379	17.9049	75.8806
CML20	194.967	85.5	9.11343	82.6961	12.0069	3.51682	26.235	76.523
CML223	199.916	73.9441	7.86425	88.5308	13.4563	3.96219	26.9944	74.9169
CML225	188.855	65.7519	10.1023	81.9113	12.2022	4.00304	24.6519	74.9169
CML226	195.633	82.5614	8.0152	90.9193	11.434	4.14511	24.5635	76.9513
CML228	169.087	74.7077	9.24032	75.053	12.1589	4.16298	27.2781	73.0967
CML27	171.744	61.653	9.03686	85.2211	12.3879	3.78929	23.1207	78.6644
CML28	177.123	75.7857	8.6212	77.4642	12.296	2.97809	18.396	82.0907
CML286	177.577	73.1822	8.95154	77.1571	11.1529	3.26788	21.8988	76.8442
CML287	196.563	82.2909	9.27751	80.3236	13.9322	3.72838	23.5355	78.022
CML290	176.024	87.445	9.00186	68.8657	12.1095	3.34753	18.8331	77.9149
CML298	155.123	62.4819	8.79184	67.287	10.7353	3.66786	21.6816	78.3432
CML300	199.111	93.644	8.65839	83.2193	12.6126	3.81519	24.1084	80.9129
CML304	200.774	79.0272	7.99114	71.9366	12.9101	3.1725	22.4893	74.1674
CML305	197.014	94.168	8.77944	84.497	11.8493	3.64285	24.3316	82.1424
CML307	181.556	79.1771	8.22522	78.0534	11.9121	3.12763	23.0597	80.9162
CML31	187.519	74.472	8.46587	80.6261	11.4195	3.36527	21.4553	74.5957
CML32	164.474	74.1427	8.28432	80.1507	11.1787	3.57867	23.1905	76.7371
CML323	152.576	62.1752	7.79986	79.2271	12.4172	3.55065	20.2371	73.525
CML324	175.198	59.0366	9.84412	75.3078	11.5857	3.6164	28.5836	72.1331
CML325	159.291	49.0477	8.38274	70.3898	11.8785	3.93191	25.628	70.3129
CML326	172.856	54.4519	8.09396	77.9647	12.3331	3.53306	21.5712	71.9189
CML327	174.409	76.675	8.0327	77.8373	11.0188	3.22028	20.3352	74.7028
CML338	183.497	71.1773	8.22522	79.102	11.6326	3.72747	18.7401	73.3109
CML360	205.423	92.4944	7.72205	74.4388	11.7255	3.43476	21.495	76.3089
CML361	176.43	65.9528	7.78987	74.3933	11.4296	3.43913	20.9731	73.2038
CML364	208.171	76.8121	9.16156	70.6991	11.4046	3.59087	21.1022	77.7008
CML408	192.778	78.5344	9.02373	83.1511	12.4313	3.41743	23.0274	77.1654
CML411	163.422	62.3765	8.69339	84.8344	12.0412	3.93702	26.4485	73.3109
CML412	176.906	72.4255	8.52275	74.7914	11.01	3.7437	26.2472	77.1654
CML415	189.871	73.8382	8.55775	81.2175	12.9186	3.47324	25.1735	77.4866
CML422	167.842	57.0049	6.95854	63.9773	12.7567	3.18144	24.3164	68.7068
CML423	156.174	65.119	8.01301	71.5613	10.4174	3.35451	22.529	68.3856
CML426	175.428	70.6417	8.35867	66.6933	10.8525	4.0231	27.6563	67.8502
CML428	171.154	74.5029	8.75683	58.8909	8.95578	3.74479	20.7342	74.9169
CML430	199.192	96.5607	10.122	70.1964	10.5005	4.19362	24.919	78.2361
CML431	181.145	85.4526	7.77893	75.103	11.9928	3.9155	21.6383	81.3412
CML432	129.348	52.6235	9.21406	74.1658	12.0635	3.58631	23.3068	72.1331
CML433	151.648	62.2993	9.23594	72.1868	12.41	3.50643	22.881	82.519
CML451	169.202	51.3655	10.3495	71.766	12.994	3.6361	24.7099	79.3068
CML454	197.498	73.5902	8.4068	93.831	13.727	3.54345	21.8915	75.1311
CML465	199.232	94.7555	9.8835	73.6313	12.3994	4.13891	23.8741	78.7715
CML470	165.014	66.4606	7.8205	72.1754	10.6023	3.63738	24.3276	67.3149
CML471	152.067	62.8584	8.31273	66.0564	11.6857	3.75683	20.5769	70.4199
CML473	147.992	60.1967	8.2646	60.0511	9.71781	3.7127	24.0602	68.4927
CML474	163.436	51.8143	7.12043	68.8907	9.09605	3.01639	25.1765	72.026
CML479	206.085	71.219	9.19219	81.5133	14.2072	3.86626	23.6759	73.6321
CML480	186.81	93.3905	8.43086	80.567	11.5	3.58449	22.0654	76.0947
CML486	198.477	80.0798	8.89028	75.2691	14.8856	3.96656	22.1447	73.9533
CML493	188.891	77.0324	8.87059	68.3084	11.51	3.6733	18.3747	74.7028
CML496	167.777	67.8805	9.31689	79.0679	12.3756	3.54947	22.2087	79.521
CML497	170.855	74.761	9.25344	73.927	10.8893	3.62716	24.8831	78.5573
CML50	189.455	98.256	7.72642	74.6549	10.2458	3.70394	21.3028	74.8099
CML51	196.401	78.4545	8.52275	79.9323	13.4942	3.2936	22.4509	74.8099
CML69	173.051	61.9271	9.56191	84.8116	13.061	3.49968	25.4358	74.1674
D047	186.797	75.4411	7.6411	74.2455	12.0734	3.14879	21.0649	66.8866
D863F	177.524	57.7769	9.20969	73.563	12.7833	4.11119	26.4137	70.8482
DAN3130	139.268	44.6369	8.18803	59.8964	11.2125	3.40758	24.9752	68.1714
DAN340	153.398	63.4883	9.75224	72.0731	10.7655	4.26785	21.2003	72.4543
DAN360	189.456	68.426	8.26022	76.5088	12.1261	4.22189	23.1573	70.527
DAN4245	202.653	74.5562	8.72621	73.9338	11.1621	4.30396	23.5725	72.9896
DAN598	149.086	47.6742	8.42211	66.1815	10.2582	4.67801	20.8807	70.4199
DAN599	171.801	66.2558	9.3147	73.5972	12.1939	4.13471	24.6629	69.9916
DE.EX	160.519	62.3801	8.89533	71.1217	11.8014	3.75377	27.1203	76.6301
DH29	163.112	54.4475	8.83559	65.3171	11.7078	3.79094	25.0454	69.1351
DH3732	157.939	70.1185	8.29523	74.4684	12.3747	3.79203	23.0964	69.3492
DONG237	128.1	28.6743	7.70564	62.4339	11.0905	2.98265	16.7232	67.9573
DONG46	154.436	61.5269	6.78107	57.8025	11.8095	3.93028	19.6642	66.03
DSB	171.985	63.0021	7.84018	75.6353	13.2715	3.50242	22.4802	66.4583
EN25	186.321	79.7784	9.04342	65.3285	12.9112	3.88978	21.9733	67.529
ES40	190.87	85.7478	8.27554	84.3908	12.0908	4.31308	22.1508	72.5614
FCD0602	192.352	71.3002	8.72621	74.9165	11.997	4.09222	25.4145	67.9573
GEMS1	215.451	68.7034	8.48981	74.7554	12.1843	4.01091	23.2935	71.647
GEMS10	183.6	50.8558	7.96472	68.8709	11.3621	3.67847	22.3403	72.7707
GEMS11	184.318	65.093	7.53298	73.7121	12.0322	3.69793	22.102	69.7742
GEMS12	203.023	77.7172	8.51314	70.415	11.276	3.81728	23.5318	73.5199
GEMS13	200.157	90.6854	9.17825	76.3344	12.7883	3.59252	22.5786	74.269
GEMS14	188.729	68.6621	9.39607	72.8356	13.4984	3.9428	22.5786	70.5234
GEMS15	181.964	69.2027	8.90988	74.3172	10.8841	3.24709	23.7702	73.8944
GEMS16	190.248	61.4992	8.61816	67.0763	12.8022	3.95253	23.0552	69.0251
GEMS17	210.27	70.3208	7.59521	82.9145	12.6408	3.45143	20.6722	74.6435
GEMS18	217.633	74.9466	8.87487	77.656	15.8729	3.96226	22.5786	72.3962
GEMS19	200.614	82.472	8.6765	81.5581	12.6362	3.66549	22.5786	76.5163
GEMS2	160.609	52.9787	8.13586	70.7072	11.2945	3.49035	20.6722	67.9014
GEMS20	205.593	79.1608	9.645	79.7844	13.1941	3.9574	23.5318	75.7672
GEMS21	186.448	50.2239	8.01139	70.415	11.3682	3.68495	20.6722	73.8944
GEMS23	179.674	64.0228	8.23699	77.3221	12.4256	3.82247	22.3403	72.7707
GEMS24	186.875	72.09	8.94877	73.4617	12.2074	3.9321	23.2935	72.0216
GEMS25	204.389	77.6619	9.39607	73.9833	13.6552	3.8095	23.5318	70.5234
GEMS27	209.744	74.3323	8.55982	71.0202	13.3647	3.3298	19.7189	72.3962
GEMS28	190.939	65.582	8.43146	70.6655	13.4154	3.42224	20.4339	72.3962
GEMS29	178.907	62.82	8.47328	64.7392	10.2617	3.55262	23.5318	70.8979
GEMS3	185.09	74.4981	7.18292	71.1245	10.8933	3.45629	19.2423	74.269
GEMS30	176.077	54.6435	8.15531	71.3958	14.1992	3.64214	23.7702	73.1453
GEMS31	173.575	56.9472	8.93321	62.8194	12.6039	3.82118	25.6766	69.3997
GEMS32	198.773	78.3806	8.81653	71.0828	14.2146	3.50981	21.8637	72.3962
GEMS33	216.243	103.365	8.7893	79.3879	14.2822	3.93405	22.5786	77.64
GEMS35	191.675	84.009	8.67261	71.4167	13.7382	3.57306	23.5318	71.2725
GEMS36	209.164	93.118	9.48942	75.3814	14.9415	4.04011	24.2468	72.7707
GEMS37	201.034	80.0086	9.1627	80.7652	13.2171	3.97199	23.5318	72.7707
GEMS39	214.611	90.3308	8.5676	81.6416	14.711	3.72095	23.0552	70.1488
GEMS4	216.141	76.4139	7.2296	74.8389	13.2771	3.87177	23.0552	72.3962
GEMS40	200.719	93.1549	8.74263	76.6126	14.4344	3.84064	22.8169	76.5163
GEMS41	189.581	75.5609	9.24049	78.9289	13.0927	4.00118	22.5786	72.3962
GEMS42	202.128	86.6923	8.29922	76.9256	14.0425	3.98659	27.3448	71.647
GEMS43	194.224	82.1525	9.3105	71.5419	14.5281	4.09362	26.1532	74.6435
GEMS44	175.781	61.9809	8.80486	67.5354	13.2909	3.97783	24.4851	68.6506
GEMS45	186.192	60.619	7.86748	73.5034	14.7968	3.78031	24.0085	68.276
GEMS46	181.062	52.4012	8.77277	74.7241	10.2279	3.77252	24.7234	72.0216
GEMS47	170.778	56.3916	8.69984	69.5804	14.1393	3.81339	24.4851	66.7778
GEMS48	204.277	68.7482	9.73057	72.9608	13.7781	4.21817	23.5318	70.8979
GEMS49	216.478	81.7041	8.27977	72.9191	12.0383	3.89902	22.3403	72.0216
GEMS5	196.431	66.742	9.05768	80.8069	13.0419	3.89415	23.7702	69.7742
GEMS50	187.376	70.3778	8.23699	71.2497	12.5901	3.80172	24.9617	72.7707
GEMS51	209.059	81.0529	8.34978	79.6383	13.1879	3.91199	23.5318	73.8944
GEMS52	188.506	66.6718	7.59521	75.7362	12.1613	3.74333	22.5786	72.7707
GEMS53	182.267	54.3977	8.61038	73.1904	11.7602	3.82766	23.2935	71.647
GEMS54	183.49	69.6205	7.96083	64.1966	14.2453	3.47089	20.1955	73.5199
GEMS55	185.67	74.872	8.75041	57.4774	11.6495	3.67522	20.9105	68.6506
GEMS56	195.079	69.6758	7.59521	70.3316	12.6224	3.78225	29.0129	72.0216
GEMS57	200.009	73.7855	7.80817	72.5957	13.7197	3.53413	25.9149	70.8979
GEMS58	179.055	66.2909	8.57927	71.8549	12.9666	4.10011	25.4383	70.5234
GEMS59	206.1	77.4899	8.9371	70.2064	15.3703	3.78874	24.7234	72.7707
GEMS6	192.17	67.0772	8.63761	78.3028	13.0527	3.76766	24.0085	70.8979
GEMS60	195.542	73.6934	8.52481	73.6703	12.8467	3.6882	21.8637	69.7742
GEMS61	212.858	89.2601	8.08529	71.0411	13.5491	3.94572	19.4806	72.3962
GEMS62	195.184	84.3272	7.5991	70.0812	12.1751	3.611	22.102	69.0251
GEMS63	192.343	62.777	8.19031	69.9142	11.4005	3.9175	21.6254	73.5199
GEMS64	206.943	70.2655	7.60688	68.8709	11.0793	3.67847	19.9572	74.6435
GEMS65	200.158	71.7425	7.66911	71.0619	12.1428	3.91848	21.3871	72.7707
GEMS66	178.089	64.7744	7.92193	70.1507	11.7786	4.21038	24.2468	72.7707
GEMS9	188.76	65.0008	7.45519	73.4617	13.0604	3.71901	22.8169	72.7707
GY1007	150.628	58.3817	8.90778	62.7504	10.8812	4.02857	21.2723	71.4785
GY1032	163.163	64.0105	8.19186	67.063	11.3107	3.32898	20.6775	73.2038
GY220	172.462	63.5135	8.34366	67.706	11.9737	3.53781	22.6687	70.8845
GY237	194.719	55.3843	7.30613	65.7111	10.6724	3.86771	21.7098	67.2548
GY246	220.067	74.9609	8.97934	76.1598	12.4643	4.17925	23.5318	69.2906
GY386	203.928	73.4054	8.91213	71.1511	13.3446	3.71998	24.0085	67.9573
GY386B	197.183	71.5444	8.46354	68.0304	12.5752	3.86852	24.9362	70.1526
GY462	188.226	61.2319	7.49836	68.8884	13.8655	3.72145	22.7449	67.7432
GY798	186.339	67.38	7.48676	73.6834	12.2824	3.6347	19.7189	73.5143
GY923	165.222	54.9887	7.96281	62.5923	11.9838	3.52964	21.1488	72.7047
HB	154.29	51.6946	6.93447	55.0921	9.56303	3.47597	20.4213	65.6017
HSBN	134.985	43.8103	6.7157	65.6962	12.3198	3.46065	19.0396	64.531
HTH-17	132.541	35.3179	8.00645	58.4474	10.4775	3.50698	27.4297	71.0624
HU803	129.31	44.0978	9.00842	70.6059	13.0743	3.74954	25.6969	72.026
HUA83-2	171.984	57.3178	8.61244	61.6889	11.7637	3.01367	19.9386	78.8786
HUANGC	136.176	45.4469	7.27794	63.7532	13.2699	3.83721	25.3236	74.7028
HYS	123.691	43.6013	7.5164	59.0047	10.3823	3.42972	20.4295	64.9593
HZS	137.971	48.2593	7.0909	60.6596	8.93471	3.62195	20.373	66.7795
IRF291	179.369	51.9983	9.0303	64.9804	12.5118	3.71124	23.624	70.6341
IRF314	168.145	45.1076	7.78987	64.919	12.6214	3.42819	23.4471	67.1007
J4112	160.112	55.1973	8.82812	65.0412	12.7596	3.63821	25.567	69.9916
JH59	196.718	56.2206	8.50525	74.7231	13.8455	4.00049	22.7303	72.026
JH96C	196.13	65.772	9.72817	77.4187	16.595	4.15769	26.529	69.6704
JI53	134.738	37.2223	9.62316	60.3809	10.8225	3.93483	27.696	68.1714
JI63	156.775	49.6597	8.04583	61.0178	11.8343	3.67111	20.4427	70.3129
JI842	151.856	38.207	7.11763	56.3344	15.0512	3.14792	20.1955	69.9481
JI846	193.109	59.7831	7.59954	70.2419	16.4387	3.57591	27.4528	69.6704
JI853	162.408	58.6837	9.03905	63.0082	11.5268	4.2415	25.801	71.7048
JIAO51	198.366	99.2076	8.45847	69.0678	11.7761	3.91487	18.4113	78.2361
JY01	201.262	77.5169	9.60129	67.7056	13.122	4.24961	26.1465	70.4199
K10	161.192	38.584	7.52333	62.0036	11.1361	3.55556	23.0735	64.531
K12	163.696	54.9867	8.23835	62.3144	10.8879	3.49239	17.8571	74.0604
K14	143.493	49.5176	7.12551	65.3062	12.8483	3.40778	24.0085	72.0156
K22	132.604	44.0082	8.87278	60.6084	11.071	4.49983	25.6005	69.8846
L3180	182.267	57.7855	9.05956	75.3885	14.3894	4.24925	25.3321	70.3885
LG001	168.676	59.7709	8.03708	68.7087	11.6673	3.40763	22.0522	70.527
LIAO138	182.18	68.3425	10.4698	75.5079	14.158	4.34736	26.8724	67.8502
LIAO159	175.958	53.3585	8.66276	73.1536	14.5106	4.27405	28.0834	70.9553
LIAO5114	170.476	47.447	7.84675	63.4518	12.3985	3.47634	19.4361	70.6341
LIAO5262	194.033	66.3099	9.58379	72.2573	11.6786	4.7061	26.9883	69.7775
LIAO5263	164.88	60.0777	9.15281	56.8573	9.84676	4.31508	23.5941	71.9189
LK11	139.826	45.8128	7.38952	56.0816	13.3726	3.24247	22.8234	68.7068
LV28	141.489	50.4804	7.07011	58.6294	11.5115	3.47232	20.2475	71.1694
LX9801	172.058	55.3683	7.7308	69.5026	10.2334	3.89981	20.3542	71.2765
LXN	166.833	69.8797	9.72653	65.0168	11.9475	3.92425	27.3153	74.3816
LY	189.283	74.4596	8.91726	66.0761	14.592	4.15623	27.0737	74.0604
LY042	184.605	60.2245	9.98195	72.2437	15.3941	3.43384	26.2197	69.7775
M153	167.541	67.8773	7.92769	67.2279	11.2921	4.26274	25.7163	71.2765
M165	160.467	65.908	8.45493	65.2147	10.9823	4.36173	27.0961	70.8482
M97	176.445	63.6444	8.61026	69.8211	11.9613	4.23846	26.9549	67.3149
MN	155.38	57.6378	7.33756	76.2671	11.307	3.98071	21.7665	60.2482
MO113	140.463	40.9105	7.57985	60.3354	13.1795	3.28229	20.7568	62.8179
MO17	176.563	55.4197	8.30179	61.4159	13.3484	3.32095	23.5779	71.1694
NAN21-3	171.458	71.187	8.91955	70.8863	12.2243	3.56041	25.3773	70.6341
NMJT	156.583	60.4412	7.31076	72.6213	9.82357	3.4596	19.9572	66.6724
P138	155.013	64.5717	9.00076	70.0618	11.1002	4.03039	24.6148	73.7947
P178	153.03	57.5848	9.83537	61.1998	10.1397	3.39035	19.9911	73.2038
Q1261	165.999	62.1607	8.94498	64.9759	11.4504	4.20876	23.0048	68.9209
QI205	170.666	55.2172	8.74589	75.9174	12.1421	4.08146	18.8017	73.0967
QI319	170.491	58.0694	8.03051	74.4274	13.7273	3.99848	24.5311	68.5997
QTHHSBTS	135.422	40.6799	6.22562	55.8936	11.0002	3.09207	16.0199	61.2118
R08	194.132	70.4547	9.80365	71.4248	13.1609	4.08146	24.3987	71.7048
R15	155.605	41.6105	6.6993	57.7346	13.6032	3.3319	19.5195	71.4906
R15X1141	173.639	56.3093	8.16615	72.2892	13.2936	3.81592	21.5407	68.8139
RY684	180.962	72.0537	8.24764	66.318	11.8891	3.68023	18.9298	71.2765
RY697	132.12	32.419	7.37877	65.7265	12.8443	3.38661	18.3411	68.2785
RY713	160.259	62.3896	8.11053	64.2609	9.68534	3.86983	24.0085	69.8356
RY729	155.246	59.2613	8.74971	75.9507	12.4643	3.54873	19.7189	71.7431
RY732	138.993	46.5866	6.94629	60.2121	9.8252	3.96064	17.8125	71.3343
RY737	153.443	45.2877	8.65292	67.7473	10.7517	3.49603	21.6719	69.2422
S22	161.533	79.5992	9.53692	59.9235	12.3826	3.66549	23.0937	71.206
S37	130.126	48.7949	8.87789	61.0785	11.4062	3.8529	24.2706	74.2745
SC55	185.207	89.9275	7.74393	67.5236	9.92212	4.18906	20.1346	77.2725
SHEN135	135.057	46.456	7.20575	64.9986	11.0595	3.51135	21.2955	66.3512
SHEN137	164.426	69.8797	8.68245	73.1991	12.7629	4.00377	21.606	68.8139
SHEN5003	122.94	37.4476	7.70236	60.3582	10.9177	3.4778	18.9389	72.4543
SI273	177.203	68.3031	8.19897	61.1202	10.3053	4.25435	23.5734	65.9229
SI434	119.873	34.7128	7.16728	59.0723	10.2002	3.83791	22.102	71.4706
SI444	144.326	43.503	8.21246	63.0574	11.4044	3.50223	24.0785	66.8866
SI446	167.938	56.7032	8.54528	68.6482	11.9456	3.65572	20.9105	72.6968
SW92E114	182.356	74.4978	9.30157	76.6226	14.1073	3.80261	22.9713	74.3816
SY1032	190.81	71.6246	8.95413	68.0593	12.7439	3.47829	-999	76.9205
SY1035	179.996	56.3036	7.21536	68.6949	11.1024	4.11075	-999	71.5977
SY1039	181.322	67.8693	8.31054	76.9751	12.2482	3.3629	22.3403	74.9169
SY1052	168.61	64.3523	8.21209	69.15	11.396	3.83161	25.1887	68.2785
SY1077	164.894	71.6845	9.45252	68.1719	12.112	3.53178	19.4807	73.9533
SY1128	160.295	76.1805	9.4744	67.8648	13.8579	3.92279	18.4448	74.5957
SY3073	166.734	58.1822	8.8509	68.206	9.98226	3.67841	20.1955	72.1331
SY998	164.471	42.7187	7.64439	72.5963	10.2193	3.63738	17.057	72.6684
SY999	164.154	49.4028	7.53996	72.8295	11.2046	3.43197	19.004	72.1518
TIAN77	147.668	68.5757	8.1749	61.0406	13.2727	3.86351	20.4066	74.2745
TIE7922	187.107	63.9907	7.70017	67.4781	11.7413	3.87051	22.1294	71.2765
TT16	188.253	75.7588	7.98895	72.9847	12.6223	4.11885	26.6345	69.5634
TX5	150.502	61.4286	6.71352	66.6023	12.1456	3.54382	26.3112	67.7432
TY1	174.117	67.8193	8.3893	78.6812	11.8548	3.91623	23.3379	73.8462
TY10	187.001	71.0274	8.42211	75.4738	12.3977	3.93921	25.0027	67.2078
TY11	189.022	71.124	8.91872	73.5562	12.6165	4.00924	25.1997	69.5634
TY2	166.494	63.0176	8.3893	69.4344	11.8058	4.05392	24.1011	70.9553
TY3	164.496	59.4045	8.72402	74.3433	13.4961	4.05848	26.762	68.7068
TY4	175.344	62.2865	8.96466	78.7221	14.1515	3.85349	25.3474	70.8482
TY5	167.332	67.3981	7.88175	71.4111	12.1155	4.12778	22.4588	72.3472
TY6	169.407	65.9776	8.99311	74.8756	12.4684	4.13708	22.956	72.2401
TY7	178.309	63.3584	8.89247	77.1912	12.5445	3.97915	24.2645	71.0624
TY8	198.137	74.4534	8.34117	78.0556	13.2494	3.92644	23.746	71.3836
TY9	185.761	69.6494	8.51837	74.2455	12.0881	3.9113	25.2192	67.4219
U8112	166.014	51.3697	7.7658	67.8079	13.4411	3.56933	21.9196	71.7048
W138	136.219	40.1032	7.98242	54.4025	12.8029	3.50443	28.2743	69.1544
WH413	131.316	56.7289	7.49234	61.8822	9.25949	3.62078	19.674	66.6724
WMR	131.654	48.2249	6.54342	65.9483	10.9868	3.27749	16.848	68.0644
WU109	140.688	51.696	8.03161	64.2366	12.0147	3.70741	20.095	69.5634
XI502	131.787	43.4054	8.1873	59.7866	11.0727	3.87924	20.0543	64.9593
XUN971	155.27	53.6942	9.78965	66.4658	13.2883	4.0428	25.6235	67.8502
XZ698	161.372	58.0126	7.29982	85.585	9.12789	4.30961	22.5747	72.8826
YAN414	156.709	56.4441	9.85725	64.7484	12.4242	3.74206	19.7747	68.2785
YE107	144.704	47.9928	8.92053	65.6595	11.2576	4.00605	27.8214	76.2392
YE478	142.422	49.7339	8.47899	65.2261	12.1235	3.79604	23.8361	70.9553
YE515	152.31	56.5782	7.80518	62.0301	10.8145	4.03678	22.1965	71.7048
YE52106	168.35	74.091	10.146	59.2777	13.2078	3.89088	20.0614	71.2765
YE8001	136.264	43.1367	7.4289	69.6846	11.3328	3.56078	22.5528	68.9209
YU374	164.196	53.1885	7.95395	63.3949	14.5902	3.32095	26.2989	72.6684
YU87-1	144.612	45.7382	8.77871	70.7537	10.4599	4.04225	30.5579	68.7068
YUN46	205.982	98.6776	8.4198	78.5533	13.5076	4.19092	27.1065	76.1418
Z2018F	178.395	66.6005	9.82662	66.1587	12.0271	4.1152	24.6367	71.1694
ZAC546	153.412	45.7165	8.47899	64.737	12.1261	3.60965	23.4623	66.6724
ZB648	168.079	61.8784	8.33297	65.8062	10.4492	4.10152	25.6676	69.028
ZH68	135.02	41.7627	7.49234	60.8813	11.1916	3.43403	21.2235	65.8159
ZHENG22	154.903	60.8057	9.57941	69.4912	12.8174	4.13362	23.0574	70.4199
ZHENG28	152.776	68.8537	9.50065	71.8229	11.9864	4.29739	24.9289	72.4543
ZHENG29	165.446	56.8085	8.39367	62.758	13.023	3.74771	22.3704	71.2765
ZHENG30	171.05	60.6426	7.89488	75.426	14.0348	3.74808	23.8101	68.2785
ZHENG32	156.445	56.3852	7.81393	63.4973	12.4525	3.12909	21.8397	72.4543
ZHENG35	168.375	52.8557	8.04802	65.2625	13.0088	3.65543	20.3329	70.2058
ZHENG58	137.926	39.6773	8.22303	68.6041	12.8443	4.03404	27.8643	66.9937
ZHENG653	154.242	50.921	7.94301	62.9172	9.93804	3.69482	19.1799	73.3109
ZHI41	179.177	73.6752	8.42868	57.1326	10.8738	3.74954	20.9063	75.024
ZHONG69	167.528	69.2684	10.017	75.2918	11.2444	3.97349	23.3159	75.1311
ZI330	169.86	59.5197	8.87716	71.3338	13.6651	3.63847	20.7407	71.4906
ZONG3	153.084	46.6653	7.87519	67.1141	11.5831	3.21189	24.4816	70.661
ZONG31	149.567	52.4647	7.8571	63.5947	12.4475	3.40123	22.6499	71.8119
ZZ01	185.823	57.4222	9.04123	69.4003	15.3167	3.73276	24.5086	66.7795
ZZ03	178.903	66.694	8.17272	78.3059	14.5916	3.71853	23.6807	68.7068

## Sheet: Table S5
Table S5. The number of significant SNPs and candidate genes associated with eight root traits.
Root traits	Number of significant SNPs	Number of candidate genes
ANG_BTM	11	20
ANG_TOP	5	19
AREA	6	30
AVG_DEN	8	34
RTP_COUNT	16	39
SKL_WIDTH	12	33
WIDTH_MAX	12	22
WIDTH_MED	13	26
Total	63	189

## Sheet: Table S6
Table S6. SNPs significantly associated with eight root traits and the candidate genes within 50 kb up- and downstream of each unique significant association SNPs.
Trait	Marker	Chr	-log10(p)	Pos (bp)	Candidate genes
ANG_BTM	chr1.S_202401064	1	5.09872	202401064	GRMZM2G328309、AC198871.3_FG002
ANG_BTM	chr1.S_20642708	1	5.18219	20642708	GRMZM2G145544、GRMZM5G808775
ANG_BTM	chr3.S_2061844	3	5.5193	2061844	GRMZM2G153127、GRMZM2G153138、GRMZM2G153181、GRMZM2G470307
ANG_BTM	chr3.S_206184680	3	5.63283	206184680	GRMZM2G122296、GRMZM2G055450、AC189044.2_FG005、GRMZM2G516369
ANG_BTM	chr3.S_206186260	3	5.46854	206186260	GRMZM2G122296、GRMZM2G055450、AC189044.2_FG005、GRMZM2G516369
ANG_BTM	chr3.S_206201659	3	5.15884	206201659	GRMZM2G055450、AC189044.2_FG005、GRMZM2G516369
ANG_BTM	chr3.S_206202608	3	5.01153	206202608	GRMZM2G055450、AC189044.2_FG005、GRMZM2G516369
ANG_BTM	chr4.S_157114681	4	5.22396	157114681	GRMZM2G133146、GRMZM2G146337、GRMZM2G146422
ANG_BTM	chr6.S_142873590	6	5.12784	142873590	GRMZM2G354338、GRMZM5G869840、GRMZM2G085042
ANG_BTM	chr7.S_36370224	7	5.59966	36370224	NA
ANG_BTM	chr7.S_79266199	7	5.40018	79266199	AC209723.3_FG003、GRMZM2G363169
ANG_TOP	chr2.S_199173677	2	5.00747	199173677	GRMZM2G165949、GRMZM2G371695、GRMZM2G172917、GRMZM2G172945、GRMZM2G703322、GRMZM2G114322、GRMZM2G146761、GRMZM2G448332、GRMZM2G146745
ANG_TOP	chr5.S_64762937	5	5.33524	64762937	GRMZM2G361518、GRMZM2G060659、GRMZM2G060583、GRMZM2G361442、GRMZM2G361391
ANG_TOP	chr7.S_169443422	7	5.0265	169443422	GRMZM2G148249、GRMZM2G120971、GRMZM2G120954
ANG_TOP	chr7.S_79266199	7	5.21673	79266199	AC209723.3_FG003、GRMZM2G363169
ANG_TOP	chr7.S_79485661	7	5.13853	79485661	NA
AREA	chr1.S_295428504	1	5.28339	295428504	GRMZM2G156756、GRMZM2G156739、GRMZM2G156729、GRMZM2G458549、GRMZM2G458533、GRMZM2G156656
AREA	chr1.S_5088005	1	5.04034	5088005	GRMZM2G159477、GRMZM2G327059
AREA	chr10.S_147254668	10	5.0125	147254668	GRMZM5G814035、GRMZM2G125083、GRMZM2G033375、GRMZM2G033388、GRMZM2G405662、GRMZM2G107620、GRMZM2G107557
AREA	chr2.S_20541417	2	5.24319	20541417	GRMZM2G328781、GRMZM2G026050、GRMZM2G175816、GRMZM2G475678
AREA	chr3.S_222583737	3	6.4772	222583737	GRMZM2G702279、GRMZM2G033867、GRMZM2G034183、GRMZM2G333775、GRMZM2G333811、GRMZM2G122762
AREA	chr4.S_162560306	4	5.21381	162560306	AC195796.3_FG001、GRMZM2G169911、AC185226.4_FG001、GRMZM2G020438、GRMZM2G325589
AVG_DENSITY	chr1.S_251144024	1	5.28439	251144024	GRMZM2G383338、GRMZM2G081099、GRMZM2G103672、GRMZM5G859316、GRMZM2G103657、GRMZM2G103610、GRMZM2G103559
AVG_DENSITY	chr1.S_75144374	1	5.32185	75144374	GRMZM2G042881、GRMZM2G043141、GRMZM2G425430
AVG_DENSITY	chr2.S_194940387	2	5.59176	194940387	GRMZM2G155337
AVG_DENSITY	chr2.S_2035342	2	5.86082	2035342	GRMZM2G039996、GRMZM2G040115、GRMZM2G040247、GRMZM2G040300、GRMZM2G040513、GRMZM2G343317、GRMZM2G040627、GRMZM2G040736
AVG_DENSITY	chr2.S_207238339	2	5.70477	207238339	GRMZM5G807835、AC194970.5_FG002、GRMZM2G703348、AC194970.5_FG001、AC194970.5_FG005、AC194970.5_FG009
AVG_DENSITY	chr3.S_178993092	3	5.32463	178993092	GRMZM2G085577、GRMZM2G449033
AVG_DENSITY	chr5.S_50091130	5	5.2758	50091130	GRMZM2G113655、GRMZM2G113613
AVG_DENSITY	chr7.S_162324227	7	5.64323	162324227	AC185108.3_FG010、AC185108.3_FG011、GRMZM2G092739、GRMZM2G092752、GRMZM2G181219
RTP_COUNT	chr1.S_10694058	1	5.23229	10694058	GRMZM2G043799、GRMZM2G329159
RTP_COUNT	chr1.S_251385242	1	5.24469	251385242	GRMZM5G812926
RTP_COUNT	chr1.S_27171924	1	5.08978	27171924	AC208897.3_FG004、GRMZM5G879116、GRMZM5G891739、GRMZM5G842306
RTP_COUNT	chr1.S_28404641	1	5.0813	28404641	GRMZM2G140991、GRMZM2G140549、GRMZM2G099797、GRMZM2G397754、GRMZM2G703531、GRMZM2G099860
RTP_COUNT	chr1.S_28414990	1	5.03889	28414990	GRMZM2G140991、GRMZM2G140549、GRMZM2G099797、GRMZM2G397754、GRMZM2G703531、GRMZM2G099860
RTP_COUNT	chr10.S_9594628	10	5.0408	9594628	GRMZM2G443495、GRMZM2G142019
RTP_COUNT	chr2.S_21786682	2	5.31199	21786682	GRMZM2G016649、GRMZM2G168917
RTP_COUNT	chr2.S_223797370	2	6.38491	223797370	GRMZM2G027001、GRMZM2G027130、GRMZM2G056088
RTP_COUNT	chr3.S_152452985	3	5.13906	152452985	GRMZM2G170689、GRMZM2G155334、GRMZM2G155348
RTP_COUNT	chr3.S_152494453	3	5.54861	152494453	GRMZM2G170689、GRMZM2G155334、GRMZM2G155348
RTP_COUNT	chr4.S_163014740	4	5.44415	163014740	GRMZM2G175983、GRMZM2G036905
RTP_COUNT	chr5.S_215924070	5	5.43697	215924070	GRMZM2G003028、GRMZM2G342327、GRMZM2G064386
RTP_COUNT	chr6.S_150519417	6	5.28297	150519417	GRMZM2G118037、GRMZM2G011169、GRMZM2G011222
RTP_COUNT	chr7.S_165470055	7	5.24719	165470055	GRMZM2G089736、GRMZM5G898768、GRMZM2G114461、GRMZM2G414043
RTP_COUNT	chr7.S_165470109	7	5.23048	165470109	GRMZM2G089736、GRMZM5G898768、GRMZM2G114461、GRMZM2G414043
RTP_COUNT	chr7.S_22583039	7	5.00259	22583039	AC190851.3_FG003、GRMZM2G158188、GRMZM2G159931、GRMZM2G159899
SKL_WIDTH	chr1.S_28387787	1	5.10881	28387787	GRMZM2G140991、GRMZM2G140549、GRMZM2G099797、GRMZM2G397754
SKL_WIDTH	chr1.S_28400877	1	7.08981	28400877	GRMZM2G140991、GRMZM2G140549、GRMZM2G099797、GRMZM2G397754、GRMZM2G703531、GRMZM2G099860
SKL_WIDTH	chr1.S_28404183	1	5.5283	28404183	GRMZM2G140991、GRMZM2G140549、GRMZM2G099797、GRMZM2G397754、GRMZM2G703531、GRMZM2G099860
SKL_WIDTH	chr1.S_28404641	1	6.19054	28404641	GRMZM2G140991、GRMZM2G140549、GRMZM2G099797、GRMZM2G397754、GRMZM2G703531、GRMZM2G099860
SKL_WIDTH	chr1.S_28414990	1	5.44191	28414990	GRMZM2G140991、GRMZM2G140549、GRMZM2G099797、GRMZM2G397754、GRMZM2G703531、GRMZM2G099860
SKL_WIDTH	chr1.S_28415233	1	5.69151	28415233	GRMZM2G140991、GRMZM2G140549、GRMZM2G099797、GRMZM2G397754、GRMZM2G703531、GRMZM2G099860
SKL_WIDTH	chr1.S_28415629	1	5.53073	28415629	GRMZM2G140991、GRMZM2G140549、GRMZM2G099797、GRMZM2G397754、GRMZM2G703531、GRMZM2G099860
SKL_WIDTH	chr1.S_290143632	1	5.18979	290143632	GRMZM2G062394、GRMZM2G062377、GRMZM2G062357、GRMZM2G062289、GRMZM2G047299、GRMZM2G047223、GRMZM2G349062、GRMZM2G022662、GRMZM2G046231、GRMZM2G046267
SKL_WIDTH	chr3.S_219483193	3	5.05179	219483193	GRMZM2G005815、GRMZM2G306357
SKL_WIDTH	chr7.S_136329563	7	5.01393	136329563	GRMZM5G806833、GRMZM2G168332
SKL_WIDTH	chr8.S_167128966	8	5.16399	167128966	AC203392.3_FG004、GRMZM2G162329、GRMZM2G061043、GRMZM2G363408、GRMZM2G123394、GRMZM2G087875
SKL_WIDTH	chr9.S_154310503	9	5.14192	154310503	GRMZM2G153152、GRMZM5G829967、GRMZM2G467007、GRMZM2G466984、GRMZM2G064612、GRMZM2G064600、GRMZM2G064563
WIDTH_MAX	chr1.S_20642708	1	5.10386	20642708	GRMZM2G145544、GRMZM5G808775
WIDTH_MAX	chr1.S_28400877	1	6.81097	28400877	GRMZM2G140991、GRMZM2G140549、GRMZM2G099797、GRMZM2G397754、GRMZM2G703531、GRMZM2G099860
WIDTH_MAX	chr1.S_28404183	1	5.23558	28404183	GRMZM2G140991、GRMZM2G140549、GRMZM2G099797、GRMZM2G397754、GRMZM2G703531、GRMZM2G099860
WIDTH_MAX	chr1.S_28404641	1	5.8528	28404641	GRMZM2G140991、GRMZM2G140549、GRMZM2G099797、GRMZM2G397754、GRMZM2G703531、GRMZM2G099860
WIDTH_MAX	chr1.S_28414990	1	5.28764	28414990	GRMZM2G140991、GRMZM2G140549、GRMZM2G099797、GRMZM2G397754、GRMZM2G703531、GRMZM2G099860
WIDTH_MAX	chr1.S_28415233	1	5.51616	28415233	GRMZM2G140991、GRMZM2G140549、GRMZM2G099797、GRMZM2G397754、GRMZM2G703531、GRMZM2G099860
WIDTH_MAX	chr1.S_28415629	1	5.31063	28415629	GRMZM2G140991、GRMZM2G140549、GRMZM2G099797、GRMZM2G397754、GRMZM2G703531、GRMZM2G099860
WIDTH_MAX	chr2.S_146440096	2	5.10623	146440096	GRMZM2G026556
WIDTH_MAX	chr3.S_219483193	3	5.26089	219483193	GRMZM2G005815、GRMZM2G306357
WIDTH_MAX	chr6.S_9505039	6	5.1455	9505039	GRMZM2G301884、GRMZM2G301803、GRMZM2G531699
WIDTH_MAX	chr7.S_136329563	7	5.08744	136329563	GRMZM5G806833、GRMZM2G168332
WIDTH_MAX	chr8.S_167128966	8	5.06098	167128966	AC203392.3_FG004、GRMZM2G162329、GRMZM2G061043、GRMZM2G363408、GRMZM2G123394、GRMZM2G087875
WIDTH_MED	chr1.S_202401064	1	5.49818	202401064	GRMZM2G328309、AC198871.3_FG002
WIDTH_MED	chr1.S_28400877	1	7.39089	28400877	GRMZM2G140991、GRMZM2G140549、GRMZM2G099797、GRMZM2G397754、GRMZM2G703531、GRMZM2G099860
WIDTH_MED	chr1.S_28404149	1	5.00699	28404149	GRMZM2G140991、GRMZM2G140549、GRMZM2G099797、GRMZM2G397754、GRMZM2G703531、GRMZM2G099860
WIDTH_MED	chr1.S_28404183	1	6.14976	28404183	GRMZM2G140991、GRMZM2G140549、GRMZM2G099797、GRMZM2G397754、GRMZM2G703531、GRMZM2G099860
WIDTH_MED	chr1.S_28404545	1	5.38709	28404545	GRMZM2G140991、GRMZM2G140549、GRMZM2G099797、GRMZM2G397754、GRMZM2G703531、GRMZM2G099860
WIDTH_MED	chr1.S_28404641	1	7.1201	28404641	GRMZM2G140991、GRMZM2G140549、GRMZM2G099797、GRMZM2G397754、GRMZM2G703531、GRMZM2G099860
WIDTH_MED	chr1.S_28414990	1	6.26904	28414990	GRMZM2G140991、GRMZM2G140549、GRMZM2G099797、GRMZM2G397754、GRMZM2G703531、GRMZM2G099860
WIDTH_MED	chr1.S_28415233	1	5.88792	28415233	GRMZM2G140991、GRMZM2G140549、GRMZM2G099797、GRMZM2G397754、GRMZM2G703531、GRMZM2G099860
WIDTH_MED	chr1.S_28415629	1	6.05542	28415629	GRMZM2G140991、GRMZM2G140549、GRMZM2G099797、GRMZM2G397754、GRMZM2G703531、GRMZM2G099860
WIDTH_MED	chr1.S_51294468	1	5.17207	51294468	GRMZM2G385931、GRMZM2G084783、GRMZM2G084821、GRMZM5G833991、GRMZM2G084940
WIDTH_MED	chr1.S_51443471	1	5.40483	51443471	GRMZM2G070849
WIDTH_MED	chr4.S_239640913	4	5.01939	239640913	GRMZM2G074423、GRMZM2G074414、GRMZM2G074278、GRMZM2G074252、GRMZM2G074015、GRMZM2G006234、GRMZM2G006197
WIDTH_MED	chr8.S_171408290	8	5.08591	171408290	GRMZM2G310115、GRMZM2G012160、AC204359.3_FG004、AC204359.3_FG005、GRMZM2G409635

## Sheet: Table S7
Table S7. The number of significant SNPs and candidate genes associated with eight aboveground traits.
Aboveground traits	Number of significant SNPs	Number of candidate genes
HKW	13	29
ED	9	16
EH	21	41
ELL	12	27
ELW	19	55
EL	80	49
PH	8	23
SD	45	40
Total	207	280

## Sheet: Table S8
Table S8. SNPs significantly associated with eight aboveground traits and the candidate genes within 50 kb up- and downstream of each unique significant association SNPs.
Trait	Marker	Chr	-log10(p)	Pos (bp)	Candidate genes
HKW	chr1.S_59123019	1	5.57914	59123019	GRMZM2G552278、AC205888.4_FG004、GRMZM2G117228
HKW	chr1.S_59123018	1	5.57701	59123018	GRMZM2G552278、AC205888.4_FG004、GRMZM2G117228
HKW	chr1.S_59123020	1	5.57701	59123020	GRMZM2G552278、AC205888.4_FG004、GRMZM2G117228
HKW	chr1.S_46860941	1	5.14852	46860941	GRMZM2G010545、GRMZM2G313934、GRMZM2G010328、GRMZM2G129302
HKW	chr1.S_58732094	1	5.12227	58732094	GRMZM2G177532、GRMZM2G097843
HKW	chr1.S_208095004	1	5.04965	208095004	GRMZM2G479318、GRMZM2G178913
ED	chr1.S_270604088	1	5.4015	270604088	GRMZM2G133198、GRMZM2G704053
EH	chr1.S_52564867	1	5.23389	52564867	GRMZM2G421779、GRMZM2G033519、GRMZM2G033570
ELL	chr1.S_255152908	1	5.22676	255152908	GRMZM2G172555、GRMZM2G172506
ELL	chr1.S_255152902	1	5.03387	255152902	GRMZM2G172555、GRMZM2G172506
ELW	chr1.S_282895979	1	5.61105	282895979	GRMZM2G067964、GRMZM2G471348、GRMZM2G170727、GRMZM5G838226
ELW	chr1.S_282790993	1	5.43296	282790993	GRMZM2G367092、GRMZM2G068179、GRMZM2G068158、GRMZM2G068028
ELW	chr1.S_197605262	1	5.28438	197605262	GRMZM2G380227、GRMZM2G081160、GRMZM2G379773
ELW	chr1.S_295890119	1	5.28393	295890119	GRMZM2G057973、GRMZM2G058075、GRMZM2G058089
ELW	chr1.S_277845908	1	5.2183	277845908	GRMZM2G123700、GRMZM2G123714、GRMZM2G123732
ELW	chr1.S_282895808	1	5.05209	282895808	GRMZM2G067964、GRMZM2G471348、GRMZM2G170727、GRMZM5G838226
EL	chr1.S_50679974	1	7.10842	50679974	GRMZM2G703565、GRMZM2G008490、AC208571.4_FG001
EL	chr1.S_50679148	1	6.97258	50679148	GRMZM2G703565、GRMZM2G008490、AC208571.4_FG001
EL	chr1.S_50677503	1	6.94397	50677503	GRMZM2G329040、GRMZM2G703565、GRMZM2G008490、AC208571.4_FG001
EL	chr1.S_50679226	1	6.70016	50679226	GRMZM2G703565、GRMZM2G008490、AC208571.4_FG001
EL	chr1.S_50653084	1	6.54096	50653084	GRMZM2G329040、GRMZM2G703565、GRMZM2G008490
EL	chr1.S_50681587	1	6.4563	50681587	GRMZM2G703565、GRMZM2G008490、AC208571.4_FG001
EL	chr1.S_50680611	1	6.44577	50680611	GRMZM2G703565、GRMZM2G008490、AC208571.4_FG001
EL	chr1.S_50645592	1	6.43089	50645592	GRMZM2G329040、GRMZM2G703565、GRMZM2G008490
EL	chr1.S_50667224	1	6.42617	50667224	GRMZM2G329040、GRMZM2G703565、GRMZM2G008490、AC208571.4_FG001
EL	chr1.S_50667280	1	6.42617	50667280	GRMZM2G329040、GRMZM2G703565、GRMZM2G008490、AC208571.4_FG001
EL	chr1.S_50668089	1	6.42617	50668089	GRMZM2G329040、GRMZM2G703565、GRMZM2G008490、AC208571.4_FG001
EL	chr1.S_50646148	1	6.42014	50646148	GRMZM2G329040、GRMZM2G703565、GRMZM2G008490
EL	chr1.S_50631071	1	6.37177	50631071	GRMZM2G329040、GRMZM2G703565
EL	chr1.S_50631115	1	6.37177	50631115	GRMZM2G329040、GRMZM2G703565
EL	chr1.S_50628791	1	6.37177	50628791	GRMZM2G329040、GRMZM2G703565
EL	chr1.S_50628996	1	6.37177	50628996	GRMZM2G329040、GRMZM2G703565
EL	chr1.S_50644110	1	6.36946	50644110	GRMZM2G329040、GRMZM2G703565、GRMZM2G008490
EL	chr1.S_50643680	1	6.24348	50643680	GRMZM2G329040、GRMZM2G703565、GRMZM2G008490
EL	chr1.S_50643684	1	6.22691	50643684	GRMZM2G329040、GRMZM2G703565、GRMZM2G008490
EL	chr1.S_50645623	1	6.18393	50645623	GRMZM2G329040、GRMZM2G703565、GRMZM2G008490
EL	chr1.S_50668554	1	6.17709	50668554	GRMZM2G329040、GRMZM2G703565、GRMZM2G008490、AC208571.4_FG001
EL	chr1.S_50680188	1	6.11891	50680188	GRMZM2G703565、GRMZM2G008490、AC208571.4_FG001
EL	chr1.S_50680165	1	6.11891	50680165	GRMZM2G703565、GRMZM2G008490、AC208571.4_FG001
EL	chr1.S_50653083	1	6.05152	50653083	GRMZM2G329040、GRMZM2G703565、GRMZM2G008490
EL	chr1.S_50651715	1	6.03657	50651715	GRMZM2G329040、GRMZM2G703565、GRMZM2G008490
EL	chr1.S_50680844	1	6.02916	50680844	GRMZM2G703565、GRMZM2G008490、AC208571.4_FG001
EL	chr1.S_50681152	1	6.02916	50681152	GRMZM2G703565、GRMZM2G008490、AC208571.4_FG001
EL	chr1.S_50681683	1	6.02916	50681683	GRMZM2G703565、GRMZM2G008490、AC208571.4_FG001
EL	chr1.S_50681705	1	6.02916	50681705	GRMZM2G703565、GRMZM2G008490、AC208571.4_FG001
EL	chr1.S_50681720	1	6.02916	50681720	GRMZM2G703565、GRMZM2G008490、AC208571.4_FG001
EL	chr1.S_50681621	1	6.02916	50681621	GRMZM2G703565、GRMZM2G008490、AC208571.4_FG001
EL	chr1.S_50667301	1	6.02751	50667301	GRMZM2G329040、GRMZM2G703565、GRMZM2G008490、AC208571.4_FG001
EL	chr1.S_50649085	1	6.02376	50649085	GRMZM2G329040、GRMZM2G703565、GRMZM2G008490
EL	chr1.S_50652876	1	5.91703	50652876	GRMZM2G329040、GRMZM2G703565、GRMZM2G008490
EL	chr1.S_50628618	1	5.91672	50628618	GRMZM2G329040、GRMZM2G703565
EL	chr1.S_50681368	1	5.91577	50681368	GRMZM2G703565、GRMZM2G008490、AC208571.4_FG001
EL	chr1.S_50668188	1	5.87159	50668188	GRMZM2G329040、GRMZM2G703565、GRMZM2G008490、AC208571.4_FG001
EL	chr1.S_50645219	1	5.8473	50645219	GRMZM2G329040、GRMZM2G703565、GRMZM2G008490
EL	chr1.S_50645263	1	5.81305	50645263	GRMZM2G329040、GRMZM2G703565、GRMZM2G008490
EL	chr1.S_50649765	1	5.80451	50649765	GRMZM2G329040、GRMZM2G703565、GRMZM2G008490
EL	chr1.S_50646115	1	5.78122	50646115	GRMZM2G329040、GRMZM2G703565、GRMZM2G008490
EL	chr1.S_50639762	1	5.69254	50639762	GRMZM2G329040、GRMZM2G703565、GRMZM2G008490
EL	chr1.S_50628954	1	5.68752	50628954	GRMZM2G329040、GRMZM2G703565
EL	chr1.S_50645624	1	5.60776	50645624	GRMZM2G329040、GRMZM2G703565、GRMZM2G008490
EL	chr1.S_50681866	1	5.57194	50681866	GRMZM2G703565、GRMZM2G008490、AC208571.4_FG001
EL	chr1.S_50681957	1	5.57194	50681957	GRMZM2G703565、GRMZM2G008490、AC208571.4_FG001
EL	chr1.S_50683213	1	5.56924	50683213	GRMZM2G703565、GRMZM2G008490、AC208571.4_FG001
EL	chr1.S_50687653	1	5.56924	50687653	GRMZM2G703565、GRMZM2G008490、AC208571.4_FG001
EL	chr1.S_50700847	1	5.56924	50700847	GRMZM2G703565、GRMZM2G008490、AC208571.4_FG001
EL	chr1.S_50684960	1	5.56924	50684960	GRMZM2G703565、GRMZM2G008490、AC208571.4_FG001
EL	chr1.S_50694259	1	5.56924	50694259	GRMZM2G703565、GRMZM2G008490、AC208571.4_FG001
EL	chr1.S_50707101	1	5.56924	50707101	GRMZM2G703565、GRMZM2G008490、AC208571.4_FG001
EL	chr1.S_50682285	1	5.55554	50682285	GRMZM2G703565、GRMZM2G008490、AC208571.4_FG001
EL	chr1.S_50711607	1	5.52147	50711607	GRMZM2G703565、GRMZM2G008490、AC208571.4_FG001
EL	chr1.S_50712442	1	5.52034	50712442	GRMZM2G008490、AC208571.4_FG001
EL	chr1.S_50710980	1	5.46636	50710980	GRMZM2G703565、GRMZM2G008490、AC208571.4_FG001
EL	chr1.S_50712249	1	5.45058	50712249	GRMZM2G008490、AC208571.4_FG001
EL	chr1.S_50712263	1	5.45058	50712263	GRMZM2G008490、AC208571.4_FG001
EL	chr1.S_50653090	1	5.4249	50653090	GRMZM2G329040、GRMZM2G703565、GRMZM2G008490
EL	chr1.S_50628643	1	5.24832	50628643	GRMZM2G329040、GRMZM2G703565
EL	chr1.S_50667093	1	5.24006	50667093	GRMZM2G329040、GRMZM2G703565、GRMZM2G008490、AC208571.4_FG001
EL	chr1.S_49656587	1	5.21858	49656587	GRMZM5G824629、GRMZM2G056373、GRMZM2G011483
EL	chr1.S_49656821	1	5.20054	49656821	GRMZM5G824629、GRMZM2G056373、GRMZM2G011483
EL	chr1.S_50667095	1	5.15739	50667095	GRMZM2G329040、GRMZM2G703565、GRMZM2G008490、AC208571.4_FG001
EL	chr1.S_50682754	1	5.10681	50682754	GRMZM2G703565、GRMZM2G008490、AC208571.4_FG001
EL	chr1.S_182357950	1	5.0705	182357950	GRMZM2G703832、GRMZM2G703834、GRMZM2G379179、GRMZM2G048616
EL	chr1.S_265064272	1	5.0224	265064272	GRMZM2G400092
PH	chr1.S_24671088	1	5.72493	24671088	GRMZM2G003506
PH	chr1.S_24671082	1	5.27765	24671082	GRMZM2G003506
PH	chr1.S_290108100	1	5.21396	290108100	GRMZM2G062394、GRMZM2G062377、GRMZM2G062357、GRMZM2G062289、GRMZM2G047299、GRMZM2G047223、GRMZM2G349062、GRMZM2G046231、GRMZM2G046267
PH	chr1.S_287940898	1	5.0573	287940898	GRMZM2G080034
SD	chr1.S_296904992	1	5.85011	296904992	GRMZM2G035017、GRMZM2G704150、AC217358.3_FG005、GRMZM5G881369、GRMZM5G891724、AC217358.3_FG003
SD	chr1.S_296905171	1	5.30944	296905171	GRMZM2G035017、GRMZM2G704150、AC217358.3_FG005、GRMZM5G881369、GRMZM5G891724、AC217358.3_FG003
SD	chr1.S_296905299	1	5.30944	296905299	GRMZM2G035017、GRMZM2G704150、AC217358.3_FG005、GRMZM5G881369、GRMZM5G891724、AC217358.3_FG003
SD	chr1.S_245904835	1	5.252	245904835	GRMZM2G438960、GRMZM2G013832
SD	chr1.S_296905178	1	5.07367	296905178	GRMZM2G035017、GRMZM2G704150、AC217358.3_FG005、GRMZM5G881369、GRMZM5G891724、AC217358.3_FG003
HKW	chr2.S_37133183	2	5.46342	37133183	GRMZM2G165633、GRMZM2G057637
HKW	chr2.S_186159905	2	5.14804	186159905	GRMZM2G001973、GRMZM2G002043、GRMZM2G002053、GRMZM2G002075、GRMZM2G002104、GRMZM2G002131、GRMZM2G002142
EH	chr2.S_6200993	2	6.34935	6200993	GRMZM2G702909、GRMZM2G072850、GRMZM2G072820、GRMZM2G072264、AC199343.3_FG013
EH	chr2.S_165105143	2	5.00865	165105143	GRMZM2G386138、GRMZM2G047727
ELW	chr2.S_31045035	2	6.19244	31045035	GRMZM2G056036、GRMZM2G055957
ELW	chr2.S_31044301	2	5.79807	31044301	GRMZM2G056036、GRMZM2G055957
ELW	chr2.S_33077034	2	5.45172	33077034	GRMZM2G022974、GRMZM2G023033、GRMZM2G031398、AC194325.3_FG006
ELW	chr2.S_31042503	2	5.34362	31042503	GRMZM2G056036、GRMZM2G055957
ELW	chr2.S_33076323	2	5.33055	33076323	GRMZM2G022974、GRMZM2G023033、GRMZM2G031398、AC194325.3_FG006
ELW	chr2.S_61852592	2	5.31673	61852592	GRMZM2G093826、AC191073.2_FG003、GRMZM2G395267
SD	chr2.S_221008779	2	6.45086	221008779	GRMZM2G124802、GRMZM2G033937
SD	chr2.S_221068015	2	6.31374	221068015	GRMZM2G412911、GRMZM2G112839
SD	chr2.S_221068581	2	5.90092	221068581	GRMZM2G412911、GRMZM2G112839
SD	chr2.S_12630085	2	5.89685	12630085	GRMZM2G176225、GRMZM2G180160、GRMZM2G180190
SD	chr2.S_221009010	2	5.81483	221009010	GRMZM2G124802、GRMZM2G033937
SD	chr2.S_221080347	2	5.81045	221080347	GRMZM2G412911、GRMZM2G112839
SD	chr2.S_70724089	2	5.66737	70724089	AC177924.2_FG001、AC177924.2_FG003
SD	chr2.S_221068862	2	5.6156	221068862	GRMZM2G412911、GRMZM2G112839
SD	chr2.S_221074459	2	5.5524	221074459	GRMZM2G412911、GRMZM2G112839
SD	chr2.S_221071120	2	5.47685	221071120	GRMZM2G412911、GRMZM2G112839
SD	chr2.S_221068398	2	5.40808	221068398	GRMZM2G412911、GRMZM2G112839
SD	chr2.S_221009038	2	5.38459	221009038	GRMZM2G124802、GRMZM2G033937
SD	chr2.S_221073654	2	5.3823	221073654	GRMZM2G412911、GRMZM2G112839
SD	chr2.S_221007298	2	5.37641	221007298	GRMZM2G124802、GRMZM2G033937
SD	chr2.S_221009968	2	5.30838	221009968	GRMZM2G124802、GRMZM2G033937
SD	chr2.S_221074584	2	5.26621	221074584	GRMZM2G412911、GRMZM2G112839
SD	chr2.S_70685492	2	5.2457	70685492	AC177924.2_FG001
SD	chr2.S_221007889	2	5.22879	221007889	GRMZM2G124802、GRMZM2G033937
SD	chr2.S_221068992	2	5.22634	221068992	GRMZM2G412911、GRMZM2G112839
SD	chr2.S_70689212	2	5.21101	70689212	AC177924.2_FG001
SD	chr2.S_70658005	2	5.15303	70658005	GRMZM5G872150
SD	chr2.S_70689660	2	5.14921	70689660	AC177924.2_FG001
SD	chr2.S_221072766	2	5.11687	221072766	GRMZM2G412911、GRMZM2G112839
SD	chr2.S_221010031	2	5.09231	221010031	GRMZM2G124802、GRMZM2G033937
SD	chr2.S_221069067	2	5.0535	221069067	GRMZM2G412911、GRMZM2G112839
SD	chr2.S_221009759	2	5.04605	221009759	GRMZM2G124802、GRMZM2G033937
SD	chr2.S_221080231	2	5.0111	221080231	GRMZM2G412911、GRMZM2G112839
SD	chr2.S_221009686	2	5.0015	221009686	GRMZM2G124802、GRMZM2G033937
SD	chr2.S_221009271	2	5.0015	221009271	GRMZM2G124802、GRMZM2G033937
ED	chr3.S_166997322	3	5.79116	166997322	GRMZM2G047572、GRMZM2G346138、GRMZM2G346132、GRMZM2G438045
ED	chr3.S_166997611	3	5.56394	166997611	GRMZM2G047572、GRMZM2G346138、GRMZM2G346132、GRMZM2G438045
ED	chr3.S_166997633	3	5.46646	166997633	GRMZM2G047572、GRMZM2G346138、GRMZM2G346132、GRMZM2G438045
ED	chr3.S_166817227	3	5.14163	166817227	GRMZM2G141638、GRMZM2G141632、GRMZM2G141600
EH	chr3.S_40446475	3	5.89455	40446475	GRMZM2G063156
ELL	chr3.S_189698414	3	5.82761	189698414	GRMZM2G085005、GRMZM2G386261、GRMZM2G386276、GRMZM2G085392
ELL	chr3.S_189698537	3	5.61948	189698537	GRMZM2G085005、GRMZM2G386261、GRMZM2G386276、GRMZM2G085392
ELL	chr3.S_189698437	3	5.41197	189698437	GRMZM2G085005、GRMZM2G386261、GRMZM2G386276、GRMZM2G085392
ELL	chr3.S_204590788	3	5.19851	204590788	GRMZM2G091540、AC194298.3_FG005、GRMZM2G091494、GRMZM2G392345、GRMZM2G159948
ELL	chr3.S_194011012	3	5.15526	194011012	GRMZM2G320013、GRMZM2G454081、GRMZM2G152451、GRMZM2G454085、GRMZM2G152461
ELW	chr3.S_114435250	3	6.44851	114435250	GRMZM2G370425、GRMZM2G069886、AC219079.3_FG005
ELW	chr3.S_6956420	3	5.0931	6956420	GRMZM2G166603、GRMZM2G166646、GRMZM2G166721、GRMZM2G138358、AC194895.3_FG004、GRMZM2G371176
EL	chr3.S_1690966	3	5.2207	1690966	GRMZM2G011636、GRMZM2G011553、GRMZM2G010460、GRMZM2G308628、GRMZM2G308619、GRMZM2G123558、GRMZM2G123540、GRMZM2G123519、GRMZM2G701269
EL	chr3.S_199307203	3	5.05252	199307203	GRMZM5G856653、GRMZM2G177883、GRMZM5G818186、GRMZM2G057067
PH	chr3.S_162748392	3	5.08789	162748392	GRMZM2G401050、GRMZM2G164475
PH	chr3.S_162298329	3	5.07682	162298329	GRMZM2G115152、GRMZM2G115133、GRMZM2G413711
SD	chr3.S_217140040	3	5.9285	217140040	GRMZM2G014395、GRMZM2G129860、GRMZM2G560358
SD	chr3.S_217140067	3	5.43829	217140067	GRMZM2G014395、GRMZM2G129860、GRMZM2G560358
SD	chr3.S_217140028	3	5.43105	217140028	GRMZM2G014395、GRMZM2G129860、GRMZM2G560358
SD	chr3.S_217140031	3	5.33797	217140031	GRMZM2G014395、GRMZM2G129860、GRMZM2G560358
EH	chr4.S_239432810	4	5.39064	239432810	GRMZM2G073571、GRMZM2G073731、GRMZM2G374074、GRMZM2G374084、GRMZM2G374088、GRMZM5G878541、GRMZM2G094579
ELW	chr4.S_240618125	4	5.01916	240618125	GRMZM2G495337、GRMZM2G167103、GRMZM2G167149
EH	chr5.S_196032904	5	5.0818	196032904	GRMZM2G037200、GRMZM2G166976、GRMZM2G166906
EL	chr5.S_183315990	5	5.2434	183315990	GRMZM2G012841、GRMZM2G014716、GRMZM2G014750
EL	chr5.S_1046780	5	5.18093	1046780	GRMZM2G014986、GRMZM2G013750、GRMZM2G013695、GRMZM2G313678、GRMZM2G013200、GRMZM2G313656、GRMZM2G013042、GRMZM2G313481、GRMZM2G313460、GRMZM2G012229、GRMZM2G159950、GRMZM2G112015、GRMZM2G112003
EL	chr5.S_183317313	5	5.02453	183317313	GRMZM2G012841、GRMZM2G014716、GRMZM2G014750
SD	chr5.S_182033002	5	6.15827	182033002	GRMZM2G005229、GRMZM2G300771、GRMZM2G482946
SD	chr5.S_66029942	5	5.07409	66029942	GRMZM2G034143、GRMZM2G033829
HKW	chr6.S_6891408	6	5.28034	6891408	GRMZM2G180659、GRMZM2G180625、GRMZM2G481280
EH	chr6.S_72476275	6	5.77507	72476275	GRMZM5G880025、GRMZM2G039009
EH	chr6.S_26156797	6	5.10417	26156797	NA
EH	chr6.S_26180147	6	5.07026	26180147	GRMZM2G380619
EH	chr6.S_168405006	6	5.05981	168405006	GRMZM2G157034、AC197143.3_FG007、GRMZM2G141925、GRMZM2G141818
EL	chr6.S_122584736	6	5.98347	122584736	GRMZM2G161102、GRMZM2G462046、AC203774.3_FG004、GRMZM2G071162
EL	chr6.S_54029717	6	5.47297	54029717	NA
EL	chr6.S_54029699	6	5.33789	54029699	NA
EL	chr6.S_122584746	6	5.05983	122584746	GRMZM2G161102、GRMZM2G462046、AC203774.3_FG004、GRMZM2G071162
ED	chr7.S_147195851	7	5.50352	147195851	GRMZM2G168588、GRMZM2G168614、GRMZM2G168618、GRMZM2G019363
ED	chr7.S_147195829	7	5.44186	147195829	GRMZM2G168588、GRMZM2G168614、GRMZM2G168618、GRMZM2G019363
EH	chr7.S_3249905	7	5.04021	3249905	GRMZM2G456997
ELL	chr7.S_170840804	7	5.95424	170840804	GRMZM2G152963、GRMZM2G136580、GRMZM2G136578、GRMZM2G136522、GRMZM2G136367、GRMZM2G045039、GRMZM2G546834
ELL	chr7.S_170841011	7	5.45675	170841011	GRMZM2G152963、GRMZM2G136580、GRMZM2G136578、GRMZM2G136522、GRMZM2G136367、GRMZM2G045039、GRMZM2G546834
ELL	chr7.S_170855392	7	5.34307	170855392	GRMZM2G152963、GRMZM2G136580、GRMZM2G136578、GRMZM2G136522、GRMZM2G136367、GRMZM2G045039、GRMZM2G546834
ELL	chr7.S_170841162	7	5.1025	170841162	GRMZM2G152963、GRMZM2G136580、GRMZM2G136578、GRMZM2G136522、GRMZM2G136367、GRMZM2G045039、GRMZM2G546834
EL	chr7.S_67013918	7	6.21102	67013918	NA
EL	chr7.S_49209756	7	5.55815	49209756	NA
SD	chr7.S_51507065	7	5.31812	51507065	GRMZM5G814981、GRMZM2G050550、GRMZM2G351672、AC191098.3_FG002
ED	chr8.S_73748753	8	5.13261	73748753	GRMZM2G063069、GRMZM2G063025、GRMZM2G363805
ED	chr8.S_73750938	8	5.03876	73750938	GRMZM2G063069、GRMZM2G063025、GRMZM2G363805
EH	chr8.S_1831927	8	5.75824	1831927	GRMZM2G456923、GRMZM2G157007、GRMZM2G456960
EH	chr8.S_163281634	8	5.41585	163281634	GRMZM5G878615、GRMZM2G065893、GRMZM2G065971、GRMZM2G066024
EH	chr8.S_163281633	8	5.41585	163281633	GRMZM5G878615、GRMZM2G065893、GRMZM2G065971、GRMZM2G066024
EH	chr8.S_163281638	8	5.41585	163281638	GRMZM5G878615、GRMZM2G065893、GRMZM2G065971、GRMZM2G066024
EH	chr8.S_163281897	8	5.41585	163281897	GRMZM5G878615、GRMZM2G065893、GRMZM2G065971、GRMZM2G066024
ELW	chr8.S_64704655	8	5.81268	64704655	GRMZM2G355610、GRMZM2G054689、GRMZM2G159592
EL	chr8.S_110988709	8	5.42795	110988709	AC203424.3_FG001、GRMZM2G327741
EL	chr8.S_100871718	8	5.10669	100871718	GRMZM2G026470、GRMZM2G322953
PH	chr8.S_171893902	8	5.22941	171893902	GRMZM2G159643、GRMZM2G159636、GRMZM2G106702、GRMZM2G106690、GRMZM2G404056、GRMZM2G404043、GRMZM2G135244
PH	chr8.S_171893552	8	5.17292	171893552	GRMZM2G159643、GRMZM2G159636、GRMZM2G106702、GRMZM2G106690、GRMZM2G404056、GRMZM2G404043、GRMZM2G135244
SD	chr8.S_150927175	8	5.22125	150927175	GRMZM2G052296、GRMZM2G311680、GRMZM2G009732、GRMZM5G873581、AC202181.3_FG010
SD	chr8.S_130755408	8	5.03825	130755408	GRMZM2G034043
EH	chr9.S_119710585	9	5.72694	119710585	GRMZM2G151387
EH	chr9.S_18725387	9	5.16557	18725387	GRMZM2G107926
EH	chr9.S_18724964	9	5.1325	18724964	GRMZM2G107926
EH	chr9.S_9465181	9	5.12322	9465181	GRMZM5G864689
EH	chr9.S_9407762	9	5.0115	9407762	GRMZM5G808624、AC213896.2_FG005
ELL	chr9.S_128958865	9	5.32475	128958865	GRMZM2G045178、GRMZM5G820626、GRMZM2G007922、GRMZM2G008066
ELW	chr9.S_111548421	9	5.28131	111548421	GRMZM2G173871、GRMZM2G475594
SD	chr9.S_27096549	9	5.2088	27096549	GRMZM2G084739、GRMZM2G084944、GRMZM2G084968
SD	chr9.S_77026182	9	5.09636	77026182	GRMZM2G001816
HKW	chr10.S_142793080	10	5.42468	142793080	GRMZM2G028902、GRMZM2G029039、GRMZM2G029242、GRMZM2G029478、AC183938.4_FG011
HKW	chr10.S_68727925	10	5.16091	68727925	GRMZM2G090594
HKW	chr10.S_68727027	10	5.13134	68727027	GRMZM2G090594
HKW	chr10.S_68728429	10	5.0103	68728429	GRMZM2G090594
ELW	chr10.S_148101920	10	5.36262	148101920	GRMZM2G343144、GRMZM2G343149、GRMZM2G040876、GRMZM5G892522、GRMZM2G043903、GRMZM2G043776、GRMZM5G835039、GRMZM5G857930
ELW	chr10.S_126586414	10	5.0787	126586414	GRMZM2G702229、GRMZM2G546315、GRMZM2G167295、GRMZM2G167280

## Sheet: Table S9
Table S9. List of high-priority candidate genes generated from co-expression network analysis.
Gene_ID	Score	Zscore	WindowSize	FlankLimit	Method	SNP2Gene
GRMZM5G879116	0.203372	1.86974	50000	2	density	effective
GRMZM5G869840	0.192929	1.7751	50000	2	density	effective
GRMZM2G414043	0.17808	1.64052	50000	2	density	effective
GRMZM2G055450	0.159697	1.47392	50000	2	density	effective
GRMZM2G026050	0.137126	1.26936	50000	2	density	effective
GRMZM2G333811	0.135647	1.25595	50000	2	density	effective
GRMZM2G107620	0.0922345	0.862515	50000	2	density	effective
GRMZM2G113655	0.0914838	0.855712	50000	2	density	effective
GRMZM2G153138	0.0910242	0.851546	50000	2	density	effective
GRMZM2G397754	0.0890259	0.833436	50000	2	density	effective
GRMZM2G425430	0.0868433	0.813655	50000	2	density	effective
GRMZM2G043141	0.0836053	0.784309	50000	2	density	effective
GRMZM5G859316	0.0819315	0.769141	50000	2	density	effective
GRMZM2G064612	0.070141	0.662284	50000	2	density	effective
GRMZM2G467007	0.0599357	0.569795	50000	2	density	effective
GRMZM5G898768	0.0591821	0.562965	50000	2	density	effective
GRMZM2G114461	0.0588619	0.560063	50000	2	density	effective
GRMZM2G703348	0.0550063	0.525121	50000	2	density	effective
GRMZM2G103672	0.0538027	0.514213	50000	2	density	effective
GRMZM2G142019	0.0526625	0.503879	50000	2	density	effective
GRMZM2G056088	0.0451417	0.435719	50000	2	density	effective
GRMZM2G118037	0.0408487	0.396812	50000	2	density	effective
GRMZM2G092752	0.0396644	0.386079	50000	2	density	effective
GRMZM2G342327	0.0374832	0.36631	50000	2	density	effective
GRMZM2G140549	0.0344178	0.338529	50000	2	density	effective
GRMZM2G039996	0.0299699	0.298219	50000	2	density	effective
GRMZM2G016649	0.025935	0.261651	50000	2	density	effective
GRMZM2G181219	0.0219082	0.225157	50000	2	density	effective
GRMZM2G155348	0.0216933	0.223209	50000	2	density	effective
AC189044.2_FG005	0.0215432	0.221848	50000	2	density	effective
GRMZM2G042881	0.0189694	0.198522	50000	2	density	effective
GRMZM2G046231	0.0183883	0.193256	50000	2	density	effective
GRMZM2G060659	0.0171467	0.182004	50000	2	density	effective
GRMZM2G443495	0.0152787	0.165074	50000	2	density	effective
GRMZM2G103657	0.0112949	0.128969	50000	2	density	effective
GRMZM2G040115	0.00672685	0.0875695	50000	2	density	effective
GRMZM2G022662	0.00476764	0.0698134	50000	2	density	effective
GRMZM2G153181	0.00309737	0.0546759	50000	2	density	effective
GRMZM2G168917	0.00209197	0.0455641	50000	2	density	effective
AC194970.5_FG005	0.00117398	0.0372445	50000	2	density	effective
GRMZM2G354338	-0.00207679	0.00778309	50000	2	density	effective
GRMZM2G466984	-0.0029527	-0.000155153	50000	2	density	effective
GRMZM2G449033	-0.00532945	-0.0216953	50000	2	density	effective
GRMZM2G153127	-0.00930654	-0.0577393	50000	2	density	effective
GRMZM2G146422	-0.013841	-0.0988348	50000	2	density	effective
AC208897.3_FG004	-0.0145099	-0.104897	50000	2	density	effective
GRMZM2G046267	-0.0151472	-0.110673	50000	2	density	effective
GRMZM5G891739	-0.0160248	-0.118626	50000	2	density	effective
GRMZM2G175816	-0.0240348	-0.19122	50000	2	density	effective
GRMZM2G107557	-0.0243156	-0.193765	50000	2	density	effective
AC195796.3_FG001	-0.0291	-0.237125	50000	2	density	effective
GRMZM2G333775	-0.0307107	-0.251723	50000	2	density	effective
GRMZM2G085042	-0.0330277	-0.272722	50000	2	density	effective
GRMZM2G361518	-0.0372362	-0.310862	50000	2	density	effective
GRMZM2G036905	-0.0391326	-0.328049	50000	2	density	effective
GRMZM2G005815	-0.0440094	-0.372247	50000	2	density	effective
GRMZM2G327059	-0.0464838	-0.394673	50000	2	density	effective
GRMZM2G034183	-0.0465935	-0.395667	50000	2	density	effective
GRMZM2G169911	-0.0497209	-0.42401	50000	2	density	effective
GRMZM2G085577	-0.0512251	-0.437642	50000	2	density	effective
GRMZM2G140991	-0.0567444	-0.487663	50000	2	density	effective
GRMZM2G043799	-0.0616454	-0.53208	50000	2	density	effective
GRMZM2G159477	-0.0658287	-0.569993	50000	2	density	effective
GRMZM5G812926	-0.0672018	-0.582437	50000	2	density	effective
GRMZM2G306357	-0.0803274	-0.701393	50000	2	density	effective
GRMZM2G133146	-0.0822855	-0.719139	50000	2	density	effective
GRMZM2G099797	-0.0826031	-0.722017	50000	2	density	effective
GRMZM5G808775	-0.0866305	-0.758517	50000	2	density	effective
GRMZM2G155334	-0.0916942	-0.804409	50000	2	density	effective
GRMZM2G011222	-0.100435	-0.883627	50000	2	density	effective
AC194970.5_FG001	-0.102247	-0.900047	50000	2	density	effective
GRMZM2G092739	-0.102645	-0.903659	50000	2	density	effective
AC194970.5_FG009	-0.10467	-0.922008	50000	2	density	effective
GRMZM2G122296	-0.107388	-0.94664	50000	2	density	effective
GRMZM2G040247	-0.117561	-1.03883	50000	2	density	effective
GRMZM2G155337	-0.119714	-1.05835	50000	2	density	effective
GRMZM2G103610	-0.130475	-1.15588	50000	2	density	effective
AC185226.4_FG001	-0.138303	-1.22682	50000	2	density	effective
GRMZM2G475678	-0.14636	-1.29984	50000	2	density	effective
GRMZM2G159899	-0.154753	-1.3759	50000	2	density	effective
GRMZM2G011169	-0.159407	-1.41808	50000	2	density	effective
GRMZM2G328309	-0.18084	-1.61233	50000	2	density	effective
GRMZM2G146337	-0.184928	-1.64938	50000	2	density	effective
GRMZM2G113613	-0.187053	-1.66863	50000	2	density	effective
GRMZM2G040300	-0.197973	-1.7676	50000	2	density	effective
GRMZM2G329159	-0.20042	-1.78978	50000	2	density	effective
GRMZM2G064386	-0.219348	-1.96132	50000	2	density	effective
GRMZM2G003028	-0.263494	-2.36141	50000	2	density	effective
